# Supplementary material for: Aniline mediated oxidative C–C bond cleavage of α-alkoxy aldehydes in air and a model reaction for the synthesis of α-(d)-amino acid derivatives
Source: Royal Society of Chemistry journal article supplement (doi:10.1039/c3ob40685g), 2013-01-01
Supplement: c3ob40685g.pdf [file c3ob40685g.pdf]

# Aniline mediated oxidative C-C bond cleavage of $\alpha$ -alkoxy aldehydes in air and a model reaction for the synthesis of $\alpha$ -(D)-amino acid derivatives

## Supporting information

Bin Hu, Yunfeng Li, Zhongjun Li\*, and Xiangbao Meng\*

*The State Key Laboratory of Natural and Biomimetic Drugs, School of Pharmaceutical Sciences,*

*Peking University, Beijing 100191, P R China*

[xbmeng@bjmu.edu.cn](mailto:xbmeng@bjmu.edu.cn), [zjli@bjmu.edu.cn](mailto:zjli@bjmu.edu.cn)

## Table of Contents

|                                                                                                   |    |
|---------------------------------------------------------------------------------------------------|----|
| 1. General Information .....                                                                      | 2  |
| 2. Preparation of $\alpha$ -alkoxy aldehydes .....                                                | 2  |
| Procedure A for the synthesis of $\alpha$ -benzyloxy aldehydes (1a, 1c, 1d, 1f, 1h, 1i, 1j) ..... | 2  |
| Procedure B for the synthesis of 2-(benzyloxy)-2-(furanyl)acetaldehyde (1e) .....                 | 3  |
| Procedure C for the synthesis of $\alpha$ -methyloxy aldehydes (1b, 1g) .....                     | 3  |
| 3. Characterization of Substrates .....                                                           | 3  |
| 4. General Procedure for oxidative C-C bond cleavage reaction .....                               | 5  |
| 5. Characterization of products .....                                                             | 5  |
| 6. Procedure for mechanistic study .....                                                          | 7  |
| 7. One pot operation for Mannich reaction/Oxidative cleavage to serine derivative .....           | 8  |
| 8. $^1\text{H}$ NMR and $^{13}\text{C}$ NMR spectra for substrates and products .....             | 10 |
| 9. HPLC spectra for <i>ee</i> determination .....                                                 | 58 |

## 1. General Information

All reagents and materials were purchased from commercial sources unless otherwise noted. All anhydrous solvents were prepared with standard procedures. Reactions were monitored by thin-layer chromatography (TLC) using commercial silica gel 60 F254 aluminum plates. Flash chromatography was performed using silica gel of particle size 0.040-0.063 mm.  $^1\text{H}$  NMR (400 MHz) and  $^{13}\text{C}$  NMR (100 MHz) spectra were recorded on Bruker AV400 spectrometers. Chemical shifts were reported in parts per million (ppm,  $\delta$ ) relative to tetramethylsilane ( $\delta$  0.00) or chloroform ( $\delta$  = 7.26, singlet).  $^1\text{H}$  NMR splitting patterns are labeled as abbreviations s (singlet), d (doublet), dd (doublet of doublets), t (triplet), q (quartet), m (multiplets) and br (broad). The determination of *ee* was performed via chiral phase HPLC analysis using HPLC Chiralcel OD-H column. Optical rotations were measured using a 0.5 mL cell with a 10 mm path length on Optical Activity automatic polarimeter. The HR-ESI-MS data were measured on a Bruker Apex IV FTICR spectrometer.

## 2. Preparation of $\alpha$ -alkoxy aldehydes

### Procedure A for the synthesis of $\alpha$ -benzyloxy aldehydes (**1a**, **1c**, **1d**, **1f**, **1h**, **1i**, **1j**)<sup>1</sup>

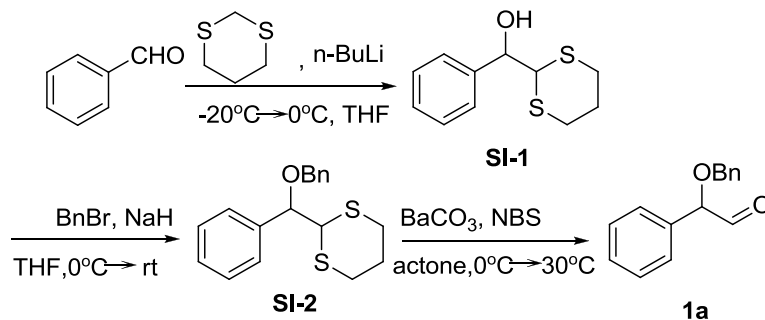

To a solution of 1,3-dithiane (3.17 g, 26 mmol) in 25 mL anhydrous THF at  $-20^\circ\text{C}$  was added slowly 11.9 mL *n*-butyllithium (2.2 M in hexane, 26 mmol) and stirred for 1 h. Arylaldehyde (2.24 mL, 22 mmol) dissolved in THF was added dropwise, and the reaction mixture was stirred at  $0^\circ\text{C}$  for 24 h. After quenching by saturated aqueous  $\text{NH}_4\text{Cl}$ , the solvent was removed under vacuo. Then the product was extracted with  $\text{CH}_2\text{Cl}_2$  and dried over  $\text{NaSO}_4$ . Purification by column chromatography on silica gel (petroleum ether: ethyl acetate = 5:1) afforded **SI-1** as light yellow oil, 3.74 g, 76%. **SI-1** (3.74 g, 16 mmol) in 25 mL anhydrous THF cooled to  $0^\circ\text{C}$  was added NaH (60%, 1.25 g, 31 mmol) and BnBr (3.9 mL, 33 mmol). The reaction was then warmed to room temperature, stirring for 2 h. Methanol was added and the mixture was concentrated followed by column chromatography on silica gel (petroleum ether: ethyl acetate = 10:1) to afford **SI-2** as yellow oil, 4.76 g, 91%. To a solution of **SI-2** (540 mg, 1.7 mmol) in acetone (34 mL) was added  $\text{BaCO}_3$  (4.23 g, 21 mmol) at  $0^\circ\text{C}$ . A solution of *N*-bromo-succinimide (590 mg, 3.3 mmol) in acetone (70 mL) was added and the mixture was stirred at  $30^\circ\text{C}$  for 2 h. After decomposition of excessive *N*-bromosuccinimide by addition of saturated aqueous  $\text{NaHCO}_3$ , the solution was filtered and concentrated, extracted with ethyl acetate by three times. The organic layer was combined and then dried over anhydrous sodium sulfate. After evaporation in vacuo, the residue was purified by chromatography on silica gel (dichloromethane: hexane = 1:1), to give **1a** as colorless oil, 319 mg, 83% yield.

### Procedure B for the synthesis of 2-(benzyloxy)-2-(furanyl)acetaldehyde (**1e**)<sup>1,2</sup>

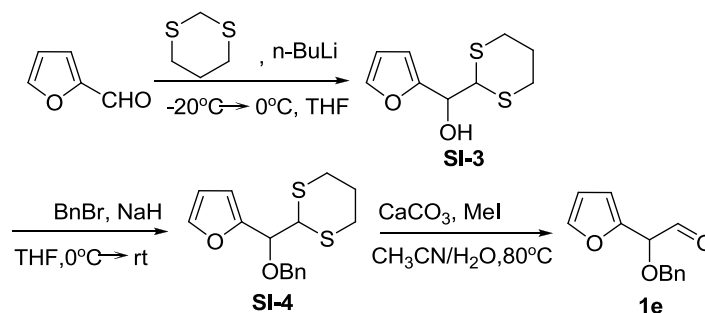

**SI-4** was obtained as in procedure A. To a solution of **SI-4** (238 mg, 0.78 mmol) in MeCN (16 mL) and H<sub>2</sub>O (4 mL) was added CaCO<sub>3</sub> (386 mg, 3.9 mmol) and MeI (2.5 mL, 40.0 mmol). The reaction mixture was stirred at 80 °C for 8 h, then concentrated under reduced pressure, and extracted with CH<sub>2</sub>Cl<sub>2</sub> for three times. The combined organic extracts were washed with brine, dried over MgSO<sub>4</sub> and concentrated. The residue was purified by column chromatography (dichloromethane: hexane = 8:1) to give aldehyde **1e** as yellow oil, 56 mg, 33%.

### Procedure C for the synthesis of α-methoxy aldehydes (**1b**, **1g**)

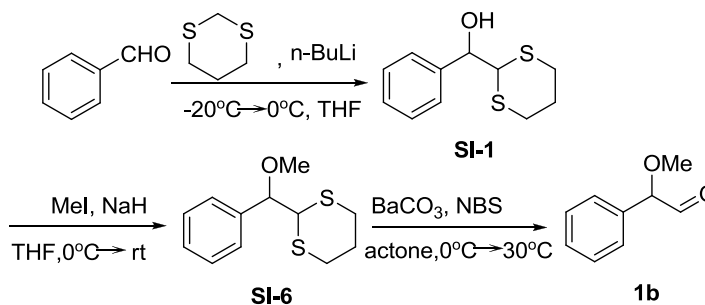

**SI-1** was obtained as in procedure A. **SI-1** (217 mg, 0.96 mmol) in 10 mL anhydrous THF cooled to 0 °C was added NaH (60%, 73 mg, 1.8 mmol) and MeI (298 μL, 4.8 mmol). The reaction was then warmed to room temperature, stirring for 1 h. Methanol was added and the mixture was concentrated followed by column chromatography on silica gel (petroleum ether: ethyl acetate = 4:1) to afford **SI-6** as yellow oil, 166 mg, 72%. **1b** was obtained from **SI-6** as procedure A.

### 3. Characterization of Substrates

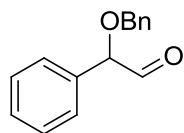

**2-(benzyloxy)-2-phenylacetaldehyde (1a):**

<sup>1</sup>H NMR (400 MHz, CDCl<sub>3</sub>): δ 9.63 (s, 1H), 7.36 (m, 10H), 4.80 (s, 1H), 4.68 (d, *J* = 11.8 Hz, 1H), 4.55 (d, *J* = 11.8 Hz, 1H). <sup>13</sup>C NMR (101 MHz, CDCl<sub>3</sub>): δ 197.5, 136.2, 133.2, 128.2, 128.1, 127.7, 127.3, 127.2, 126.8, 84.7, 70.3. These data correspond to previously reported literature<sup>1a</sup>.

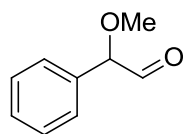

**2-methoxy-2-phenylacetaldehyde (1b):**

$^1\text{H}$  NMR (400 MHz,  $\text{CDCl}_3$ ):  $\delta$  9.59 (d,  $J$  = 1.5 Hz, 1H), 7.38 (m, 5H), 4.64 (s, 1H), 3.45 (s, 3H).  $^{13}\text{C}$  NMR (101 MHz,  $\text{CDCl}_3$ ):  $\delta$  198.3, 133.8, 129.0, 129.0, 127.5, 88.2, 57.3. These data correspond to previously reported literature<sup>1a</sup>.

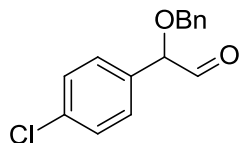

**2-(benzyloxy)-2-(4-chlorophenyl)acetaldehyde (1c):**

$^1\text{H}$  NMR (400 MHz,  $\text{CDCl}_3$ ):  $\delta$  9.61 (d,  $J$  = 1.7 Hz, 1H), 7.36 (m, 9H), 4.76 (d,  $J$  = 1.6 Hz, 1H), 4.67 (d,  $J$  = 11.8 Hz, 1H), 4.55 (d,  $J$  = 11.8 Hz, 1H).  $^{13}\text{C}$  NMR (101 MHz,  $\text{CDCl}_3$ ):  $\delta$  198.2, 136.7, 135.0, 132.6, 129.30, 128.8, 128.7, 128.3, 128.1, 84.7, 71.4. HRMS (ESI)  $m/z$  calcd for  $\text{C}_{15}\text{H}_{13}\text{ClNaO}_2$  [ $\text{M} + \text{Na}$ ] $^+$ : 283.0496, found: 283.0503.

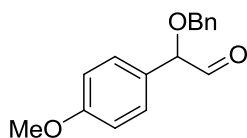

**2-(benzyloxy)-2-(4-methoxyphenyl)acetaldehyde (1d):**

$^1\text{H}$  NMR (400 MHz,  $\text{CDCl}_3$ ):  $\delta$  9.61 (s, 1H), 7.32 (m, 7H), 6.95 (d,  $J$  = 7.9 Hz, 2H), 4.75 (s, 1H), 4.66 (d,  $J$  = 12.0 Hz, 1H), 4.52 (d,  $J$  = 11.6 Hz, 1H), 3.82 (s, 3H).  $^{13}\text{C}$  NMR (101 MHz,  $\text{CDCl}_3$ ):  $\delta$  198.3, 160.2, 137.1, 129.1, 128.6, 128.1, 128.0, 125.9, 114.6, 85.0, 70.8, 55.3. HRMS (ESI)  $m/z$  calcd for  $\text{C}_{16}\text{H}_{16}\text{NaO}_3$  [ $\text{M} + \text{Na}$ ] $^+$ : 279.0992, found: 279.1000.

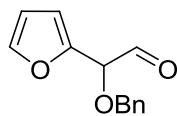

**2-(benzyloxy)-2-(furan-2-yl)acetaldehyde (1e):**

$^1\text{H}$  NMR (400 MHz,  $\text{CDCl}_3$ ):  $\delta$  9.71 (d,  $J$  = 1.2 Hz, 1H), 7.49 (d,  $J$  = 1.0 Hz, 1H), 7.34 (m, 5H), 6.46 (d,  $J$  = 3.2 Hz, 1H), 6.42 (dd,  $J$  = 3.2, 1.9 Hz, 1H), 4.87 (s, 1H), 4.68 (d,  $J$  = 11.8 Hz, 1H), 4.53 (d,  $J$  = 11.8 Hz, 1H).  $^{13}\text{C}$  NMR (101 MHz,  $\text{CDCl}_3$ ):  $\delta$  196.4, 147.6, 144.2, 136.7, 128.6, 128.2, 111.4, 110.7, 78.6, 71.0. HRMS (ESI)  $m/z$  calcd for  $\text{C}_{13}\text{H}_{12}\text{NaO}_3$  [ $\text{M} + \text{Na}$ ] $^+$ : 239.0679, found: 239.0679.

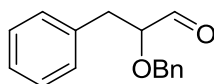

**2-(benzyloxy)-3-phenylpropanal (1f):**

$^1\text{H}$  NMR (400 MHz,  $\text{CDCl}_3$ ):  $\delta$  9.69 (d,  $J$  = 1.9 Hz, 1H), 7.25 (m, 10H), 4.59 (d,  $J$  = 11.8 Hz, 1H), 4.47 (d,  $J$  = 11.8 Hz, 1H), 3.97 (ddd,  $J$  = 8.4, 4.7, 1.9 Hz, 1H), 3.03 (dd,  $J$  = 14.2, 4.7 Hz, 1H), 2.93 (dd,  $J$  = 14.2, 8.4 Hz, 1H).  $^{13}\text{C}$  NMR (101 MHz,  $\text{CDCl}_3$ ):  $\delta$  203.1, 137.1, 136.5, 129.6, 128.5, 128.0, 127.9, 126.8, 84.2, 72.8, 36.7. These data correspond to previously reported literature<sup>3</sup>.

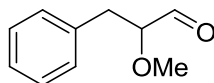

**2-methoxy-3-phenylpropanal (1g):**

$^1\text{H}$  NMR (400 MHz,  $\text{CDCl}_3$ ):  $\delta$  9.69 (d,  $J$  = 1.9 Hz, 1H), 7.28 (m, 5H), 3.80 (ddd,  $J$  = 7.9, 4.9, 1.9 Hz, 1H), 3.40 (s, 3H), 3.01 (dd,  $J$  = 14.3, 4.9 Hz, 1H), 2.91 (dd,  $J$  = 14.3, 8.0 Hz, 1H).  $^{13}\text{C}$  NMR (101 MHz,  $\text{CDCl}_3$ ):  $\delta$  203.3, 136.4, 129.4, 128.5, 126.8, 86.5, 58.6, 36.4. These data correspond to previously reported literature<sup>4</sup>.

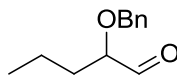

**2-(benzyloxy)pentanal (1h):**

$^1\text{H}$  NMR (400 MHz,  $\text{CDCl}_3$ ):  $\delta$  9.65 (d,  $J$  = 2.1 Hz, 1H), 7.32 (m, 5H), 4.67 (d,  $J$  = 11.7 Hz, 1H),

4.53 (d,  $J = 11.7$  Hz, 1H), 3.76 (ddd,  $J = 7.5, 5.5, 2.1$  Hz, 1H), 1.65 (m, 2H), 1.46 (m, 2H), 0.91 (t,  $J = 7.3$  Hz, 3H).  $^{13}\text{C}$  NMR (101 MHz,  $\text{CDCl}_3$ ):  $\delta$  203.9, 137.4, 128.5, 128.1, 128.0, 83.3, 72.5, 32.1, 18.1, 13.9. HRMS (ESI)  $m/z$  calcd for  $\text{C}_{12}\text{H}_{16}\text{NaO}_2$  [ $\text{M} + \text{Na}$ ] $^+$ : 215.1043, found: 215.1041.

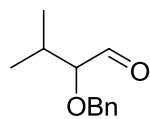

**2-(benzyloxy)-3-methylbutanal (1i):**

$^1\text{H}$  NMR (400 MHz,  $\text{CDCl}_3$ ):  $\delta$  9.66 (d,  $J = 2.7$  Hz, 1H), 7.31 (m, 5H), 4.68 (d,  $J = 11.8$  Hz, 1H), 4.49 (d,  $J = 11.8$  Hz, 1H), 3.47 (dd,  $J = 5.8, 2.7$  Hz, 1H), 2.09 (m, 1H), 0.99 (t,  $J = 7.1$  Hz, 6H).  $^{13}\text{C}$  NMR (101 MHz,  $\text{CDCl}_3$ ):  $\delta$  204.5, 137.5, 128.5, 128.0, 128.0, 88.1, 72.9, 30.0, 18.5, 17.6. HRMS (ESI)  $m/z$  calcd for  $\text{C}_{12}\text{H}_{17}\text{O}_2$  [ $\text{M} + \text{H}$ ] $^+$ : 193.1223, found: 193.1219.

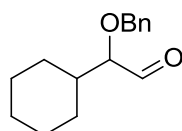

**2-(benzyloxy)-2-cyclohexylacetaldehyde (1j):**

$^1\text{H}$  NMR (400 MHz,  $\text{CDCl}_3$ ):  $\delta$  9.66 (d,  $J = 2.8$  Hz, 1H), 7.33 (m, 5H), 4.67 (d,  $J = 11.8$  Hz, 1H), 4.47 (d,  $J = 11.8$  Hz, 1H), 3.49 (dd,  $J = 5.7, 2.8$  Hz, 1H), 1.77 (m, 4H), 1.64 (m, 2H), 1.20 (m, 5H).  $^{13}\text{C}$  NMR (101 MHz,  $\text{CDCl}_3$ ):  $\delta$  204.7, 137.5, 128.5, 128.0, 128.0, 87.8, 72.9, 39.6, 28.8, 28.0, 26.2, 26.0, 25.9. HRMS (ESI)  $m/z$  calcd for  $\text{C}_{15}\text{H}_{20}\text{NaO}_2$  [ $\text{M} + \text{Na}$ ] $^+$ : 255.1356, found: 255.1358.

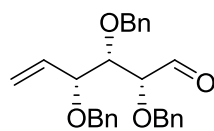

**(2R,3S,4R)-2,3,4-Tris(benzyloxy)hex-5-enal (1k)<sup>5</sup>:**

$^1\text{H}$  NMR (400 MHz,  $\text{CDCl}_3$ ):  $\delta$  9.65 (d,  $J = 0.7$  Hz, 1H), 7.29 (m, 15H), 5.82 (ddd,  $J = 16.9, 10.8, 7.7$  Hz, 1H), 5.27 (m, 2H), 4.71 (dd,  $J = 11.7, 2.3$  Hz, 2H), 4.58 (d,  $J = 11.7$  Hz, 1H), 4.54 (d,  $J = 11.5$  Hz, 1H), 4.49 (d,  $J = 11.8$  Hz, 1H), 4.36 (d,  $J = 11.5$  Hz, 1H), 4.15 (d,  $J = 5.0$  Hz, 1H), 3.87 (dd,  $J = 4.4, 0.7$  Hz, 1H), 3.80 (t,  $J = 4.7$  Hz, 1H).  $^{13}\text{C}$  NMR (101 MHz,  $\text{CDCl}_3$ ):  $\delta$  201.6, 137.8, 137.7, 137.2, 134.8, 128.5, 128.4, 128.4, 128.3, 128.3, 128.2, 128.2, 127.9, 127.6, 119.4, 82.4, 81.8, 80.0, 74.5, 73.3, 71.0. These data correspond to previously reported literature<sup>5</sup>.

#### 4. General Procedure for oxidative C-C bond cleavage reaction

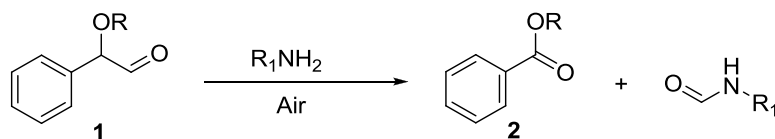

To a round-bottom flask charged with 2-(benzyloxy)-2-phenylacetaldehyde **1a** (86 mg, 0.38 mmol) in solution of toluene (4 mL) was added aniline **3f** (40 mg, 0.37 mmol). The reaction mixture was stirred at 50 °C for 2 h with a reflux condenser open to air. The solvent was then removed under vacuo, and the residue was purified by column chromatography on silica gel (dichloromethane: hexane = 2:3) to afford **2a** as yellow oil, 65 mg, 81%.

#### 5. Characterization of products

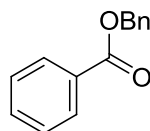

**Benzyl benzoate (2a):**

$^1\text{H}$  NMR (400 MHz,  $\text{CDCl}_3$ ):  $\delta$  8.10 (m, 2H), 7.57 (m, 1H), 7.42 (m, 7H), 5.39 (s, 2H).  $^{13}\text{C}$  NMR (101 MHz,  $\text{CDCl}_3$ ):  $\delta$  165.6, 135.3, 132.2, 129.3, 128.9, 127.8, 127.6, 127.4, 127.3, 65.9. These data correspond to previously reported literature<sup>6</sup>.

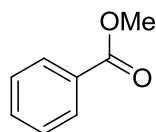

**Methyl benzoate (2b):**

$^1\text{H}$  NMR (400 MHz,  $\text{CDCl}_3$ ):  $\delta$  8.04 (d,  $J = 7.3$  Hz, 2H), 7.54 (d,  $J = 7.2$  Hz, 1H), 7.43 (t,  $J = 6.9$  Hz, 2H), 3.91 (s, 1H).  $^{13}\text{C}$  NMR (101 MHz,  $\text{CDCl}_3$ ):  $\delta$  167.1, 132.9, 130.2, 129.6, 128.4, 52.1. These data correspond to previously reported literature<sup>7</sup>.

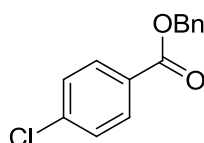

**Benzyl 4-chlorobenzoate (2c):**

$^1\text{H}$  NMR (400 MHz,  $\text{CDCl}_3$ ):  $\delta$  8.01 (d,  $J = 7.8$  Hz, 2H), 7.41 (m, 7H), 5.36 (s, 2H).  $^{13}\text{C}$  NMR (101 MHz,  $\text{CDCl}_3$ ):  $\delta$  165.6, 139.5, 135.8, 131.1, 128.8, 128.7, 128.6, 128.4, 128.3, 67.0. These data correspond to previously reported literature<sup>8</sup>.

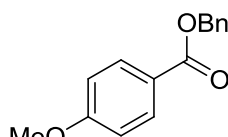

**Benzyl 4-methoxybenzoate (2d):**

$^1\text{H}$  NMR (400 MHz,  $\text{CDCl}_3$ ):  $\delta$  8.03 (m, 2H), 7.44 (m, 2H), 7.35 (m, 3H), 6.91 (m, 2H), 5.33 (s, 2H), 3.84 (s, 3H).  $^{13}\text{C}$  NMR (101 MHz,  $\text{CDCl}_3$ ):  $\delta$  166.2, 163.5, 136.4, 131.8, 128.6, 128.4, 128.1, 128.1, 127.8, 122.6, 113.6, 66.4, 55.4. These data correspond to previously reported literature<sup>8</sup>.

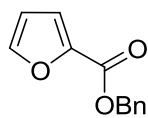

**Benzyl furan-2-carboxylate (2e):**

$^1\text{H}$  NMR (400 MHz,  $\text{CDCl}_3$ ):  $\delta$  7.57 (d,  $J = 0.8$  Hz, 1H), 7.43 (dd,  $J = 7.8, 1.2$  Hz, 2H), 7.37 (m, 3H), 7.20 (d,  $J = 3.5$  Hz, 1H), 6.49 (dd,  $J = 3.5, 1.7$  Hz, 1H), 5.34 (s, 2H).  $^{13}\text{C}$  NMR (101 MHz,  $\text{CDCl}_3$ ):  $\delta$  158.6, 146.5, 144.6, 135.6, 128.6, 128.4, 128.4, 118.2, 111.9, 66.6. These data correspond to previously reported literature<sup>9</sup>.

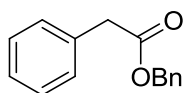

**Benzyl 2-phenylacetate (2f):**

$^1\text{H}$  NMR (400 MHz,  $\text{CDCl}_3$ ):  $\delta$  7.30 (m, 10H), 5.13 (s, 2H), 3.67 (s, 2H).  $^{13}\text{C}$  NMR (101 MHz,  $\text{CDCl}_3$ ):  $\delta$  171.4, 135.9, 133.9, 129.3, 128.6, 128.6, 128.2, 128.1, 127.1, 66.6, 41.4. These data correspond to previously reported literature<sup>10</sup>.

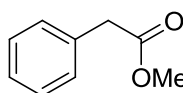

**Methyl 2-phenylacetate (2g):**

$^1\text{H}$  NMR (400 MHz,  $\text{CDCl}_3$ ):  $\delta$  7.30 (m, 5H), 3.69 (s, 3H), 3.63 (s, 2H).  $^{13}\text{C}$  NMR (101 MHz,  $\text{CDCl}_3$ ):  $\delta$  172.1, 134.0, 129.3, 128.6, 127.1, 52.1, 41.2. These data correspond to previously reported literature<sup>11</sup>.

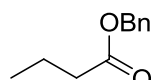

**Benzyl butyrate (2h):**

$^1\text{H}$  NMR (400 MHz,  $\text{CDCl}_3$ ):  $\delta$  7.33 (m, 5H), 5.11 (s, 2H), 2.34 (t,  $J = 7.4$  Hz, 2H), 1.67 (m, 2H), 0.94 (t,  $J = 7.4$  Hz, 3H).  $^{13}\text{C}$  NMR (101 MHz,  $\text{CDCl}_3$ ):  $\delta$  173.5, 136.2, 128.6, 128.2, 66.06, 36.2, 18.5, 13.7. These data correspond to previously reported literature<sup>12</sup>.

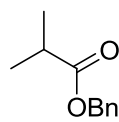

**benzyl isobutyrate (2i):**

$^1\text{H}$  NMR (400 MHz,  $\text{CDCl}_3$ ):  $\delta$  7.34 (m, 5H), 5.11 (s, 2H), 2.60 (dt,  $J = 14.0, 7.0$  Hz, 1H), 1.19 (d,  $J = 7.0$  Hz, 6H).  $^{13}\text{C}$  NMR (101 MHz,  $\text{CDCl}_3$ ):  $\delta$  177.0, 136.3, 128.5, 128.1, 128.0, 66.0, 34.0, 19.0. These data correspond to previously reported literature<sup>13</sup>.

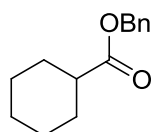

**benzyl cyclohexanecarboxylate (2j):**

$^1\text{H}$  NMR (400 MHz,  $\text{CDCl}_3$ ):  $\delta$  7.33 (m, 5H), 5.10 (s, 2H), 2.35 (tt,  $J = 11.4, 3.6$  Hz, 1H), 1.93 (dd,  $J = 13.1, 2.6$  Hz, 2H), 1.75 (m, 2H), 1.63 (m, 1H), 1.46 (m, 2H), 1.25 (m, 4H).  $^{13}\text{C}$  NMR (101 MHz,  $\text{CDCl}_3$ ):  $\delta$  175.9, 136.4, 128.5, 128.1, 128.0, 65.9, 43.2, 29.0, 25.8, 25.5. These data correspond to previously reported literature<sup>14</sup>.

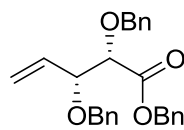

**(2S,3R)-benzyl 2,3-bis(benzyloxy)pent-4-enoate (2k):**

$^1\text{H}$  NMR (400 MHz,  $\text{CDCl}_3$ ):  $\delta$  7.31 (m, 15H), 5.94 (ddd,  $J = 17.4, 10.5, 8.0$  Hz, 1H), 5.31 (dd,  $J = 13.8, 7.7$  Hz, 2H), 5.21 (d,  $J = 12.2$  Hz, 1H), 5.11 (d,  $J = 12.2$  Hz, 1H), 4.84 (d,  $J = 12.0$  Hz, 1H), 4.66 (d,  $J = 12.2$  Hz, 1H), 4.53 (d,  $J = 12.0$  Hz, 1H), 4.39 (d,  $J = 12.2$  Hz, 1H), 4.20 (dd,  $J = 7.9, 4.4$  Hz, 1H), 4.09 (d,  $J = 4.4$  Hz, 1H).  $^{13}\text{C}$  NMR (101 MHz,  $\text{CDCl}_3$ ):  $\delta$  170.0, 138.0, 137.3, 135.5, 134.2, 128.5, 128.5, 128.4, 128.3, 128.3, 128.2, 127.9, 127.9, 127.6, 119.8, 81.0, 80.6, 73.0, 70.6, 66.7. HRMS (ESI)  $m/z$  calcd for  $\text{C}_{26}\text{H}_{26}\text{NaO}_4$   $[\text{M} + \text{Na}]^+$ : 425.1723, found: 425.1720.

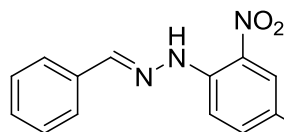

**1-benzylidene-2-(2,4-dinitrophenyl)hydrazine(2l)<sup>15</sup>:**

$^1\text{H}$  NMR (400 MHz, DMSO)  $\delta$  11.68 (s, 1H), 8.87 (d,  $J = 2.6$  Hz, 1H), 8.72 (s, 1H), 8.39 (dd,  $J = 9.6, 2.6$  Hz, 1H), 8.12 (d,  $J = 9.6$  Hz, 1H), 7.80 (dd,  $J = 7.2, 2.3$  Hz, 2H), 7.50 (dd,  $J = 8.4, 3.1$  Hz, 3H).  $^{13}\text{C}$  NMR (101 MHz, DMSO)  $\delta$  149.4, 144.5, 137.1, 133.8, 130.6, 129.8, 129.5, 129.0, 127.4, 123.0, 116.8. These data correspond to previously reported literature<sup>16</sup>.

## 6. Procedure for mechanistic study

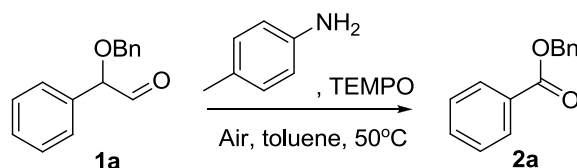

To a round-bottom flask charged with 2-(benzyloxy)-2-phenylacetaldehyde **1a** (64 mg, 0.28 mmol) in solution of toluene (4 mL) was added aniline **3f** (30 mg, 0.28 mmol) and 2,2,6,6-Tetramethyl-1-piperidinyloxy (22 mg, 0.14 mmol). The reaction mixture was stirred at 50 °C for 2 h with a reflux condenser open to air. Column chromatography on silica gel (dichloromethane: hexane = 2:3) gave recovered **1a**.

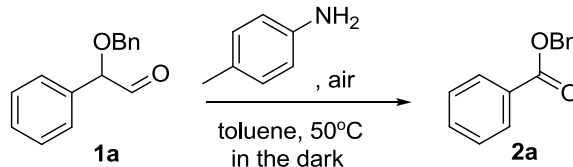

To an aluminium-foil paper wrapped round-bottom flask charged with 2-(benzyloxy)-2-phenylacetaldehyde **1a** (130 mg, 0.57 mmol) in solution of toluene (5 mL) was added aniline **3f** (62 mg, 0.58 mmol). The reaction mixture was stirred at 50 °C for 2 h with a reflux condenser open to air. The solvent was then removed under vacuo, and the residue was purified by column chromatography on silica gel (dichloromethane: hexane = 2:3) to afford **2a**, 25 mg, 18%.

## 7. One pot operation for Mannich reaction/Oxidative cleavage to serine derivative

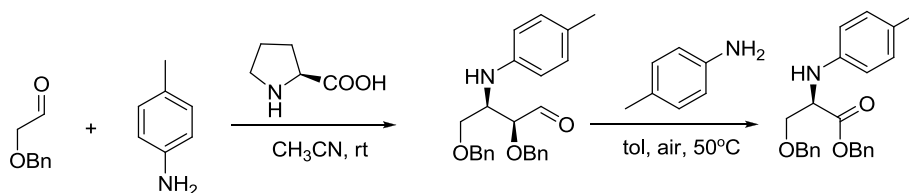

To a flask containing 2-(benzyloxy)-acetaldehyde **4** (148 mg, 0.98 mmol) and 4-methyl aniline **3f** (35 mg, 0.33 mmol) in anhydrous CH<sub>3</sub>CN (1.3 mL) was added 30% mol of L-proline (11.4 mg, 0.099 mmol). After 48 h of vigorous stirring, the reaction was quenched by addition of phosphate buffer (pH ≈ 7.0), and the aqueous phase was extracted three times with CH<sub>2</sub>Cl<sub>2</sub>. The combined organic layers were dried with NaSO<sub>4</sub>. After concentrating, the crude Mannich reaction mixture was dissolved in toluene (3 mL) followed by addition of 4-methyl aniline **3f** (70 mg, 0.65 mmol). The reaction was stirred at 50 °C for 5 h with a reflux condenser open to air. Then solvent was removed under vacuo, and the residue was purified by column chromatography on silica gel (dichloromethane: hexane = 6:1) to afford **6** as dark yellow oil, 39 mg, 32%. <sup>1</sup>H NMR (400 MHz, CDCl<sub>3</sub>) δ 7.26 (m, 10H), 6.96 (d, *J* = 8.1 Hz, 2H), 6.53 (d, *J* = 8.4 Hz, 2H), 5.18 (d, *J* = 12.3 Hz, 1H), 5.13 (d, *J* = 12.3 Hz, 1H), 4.53 (d, *J* = 12.1 Hz, 1H), 4.47 (d, *J* = 12.2 Hz, 1H), 4.25 (br, 1H), 3.88 (dd, *J* = 9.3, 3.8 Hz, 1H), 3.78 (dd, *J* = 9.3, 4.1 Hz, 1H), 2.22 (s, 3H). <sup>13</sup>C NMR (101 MHz, CDCl<sub>3</sub>) δ 172.0, 144.3, 137.6, 135.6, 129.8, 128.5, 128.4, 128.3, 128.2, 127.8, 127.8, 127.6, 114.0, 73.4, 70.2, 67.0, 57.4, 20.4. The *ee* of **6** was 97% as determined by chiral-phase HPLC analysis (Chiralcel OD-H, hexanes/*i*-PrOH = 70: 30, flow rate 1 mL/min, λ = 254 nm): minor isomer: *t*<sub>R</sub> = 6.500 min; major isomer: *t*<sub>R</sub> = 10.642 min; [α]<sub>D</sub><sup>25</sup> -13.3 ° (c = 1.5, CHCl<sub>3</sub>); HRMS (ESI) *m/z* calcd for C<sub>24</sub>H<sub>26</sub>NO<sub>3</sub> [M + H]<sup>+</sup>: 376.1907, found: 376.1900.



1. (a)H. Nagano, H. Ohkouchi and T. Yajima, *Tetrahedron*, 2003, **59**, 3649-3663; (b)C. W. Ong and C. Y. Yu, *Tetrahedron*, 2003, **59**, 9677-9682.
2. K. P. Jang, S. Y. Choi, Y. K. Chung and E. Lee, *Org. Lett.*, 2011, **13**, 2476-2479.
3. J. Mulzer, U. Steffen, H. J. Martin and L. Zorn, *Eur. J. Org. Chem.*, 2005, **2005**, 1028-1043.
4. G. Roda, S. Riva and B. Danieli, *Tetrahedron: Asymmetry*, 1999, **10**, 3939-3949.
5. Y. Li, Y. Meng, X. Meng and Z. Li, *Tetrahedron*, 2011, **67**, 4002-4008.
6. L. Cronin, F. Manoni, C. J. O' Connor and S. J. Connon, *Angew. Chem. Int. Ed.*, 2010, **49**, 3045-3048.
7. S. Seo, J. B. Taylor and M. F. Greaney, *Chem. Commun.*, 2012, **48**, 8270-8272.
8. S. K. Rout, S. Guin, K. K. Ghara, A. Banerjee and B. K. Patel, *Org. Lett.*, 2012, **14**, 3982-3985.
9. Y. Li, W. Du and W.-P. Deng, *Tetrahedron*, 2012, **68**, 3611-3615.
10. J. E. Milne, J. A. Murry, A. King and R. D. Larsen, *J. Org. Chem.*, 2008, **74**, 445-447.
11. N. Yamamoto, Y. Obora and Y. Ishii, *J. Org. Chem.*, 2011, **76**, 2937-2941.
12. A. A. Poeylout-Palena, S. A. Testero and E. G. Mata, *Chem. Commun.*, 2011, **47**, 1565-1567.
13. T. Takahashi, M. Yoshimura, H. Suzuka, T. Maegawa, Y. Sawama, Y. Monguchi and H. Sajiki, *Tetrahedron*, 2012, **68**, 8293-8299.
14. K. Ishihara, M. Niwa and Y. Kosugi, *Org. Lett.*, 2008, **10**, 2187-2190.
15. N. Havare and D. A. Plattner, *Org. Lett.*, 2012, **14**, 5078-5081.
16. F. DeRosa, L. K. Keefer and J. A. Hrabie, *J. Org. Chem.*, 2008, **73**, 1139-1142.

# 8. $^1\text{H}$ NMR and $^{13}\text{C}$ NMR spectra for substrates and products

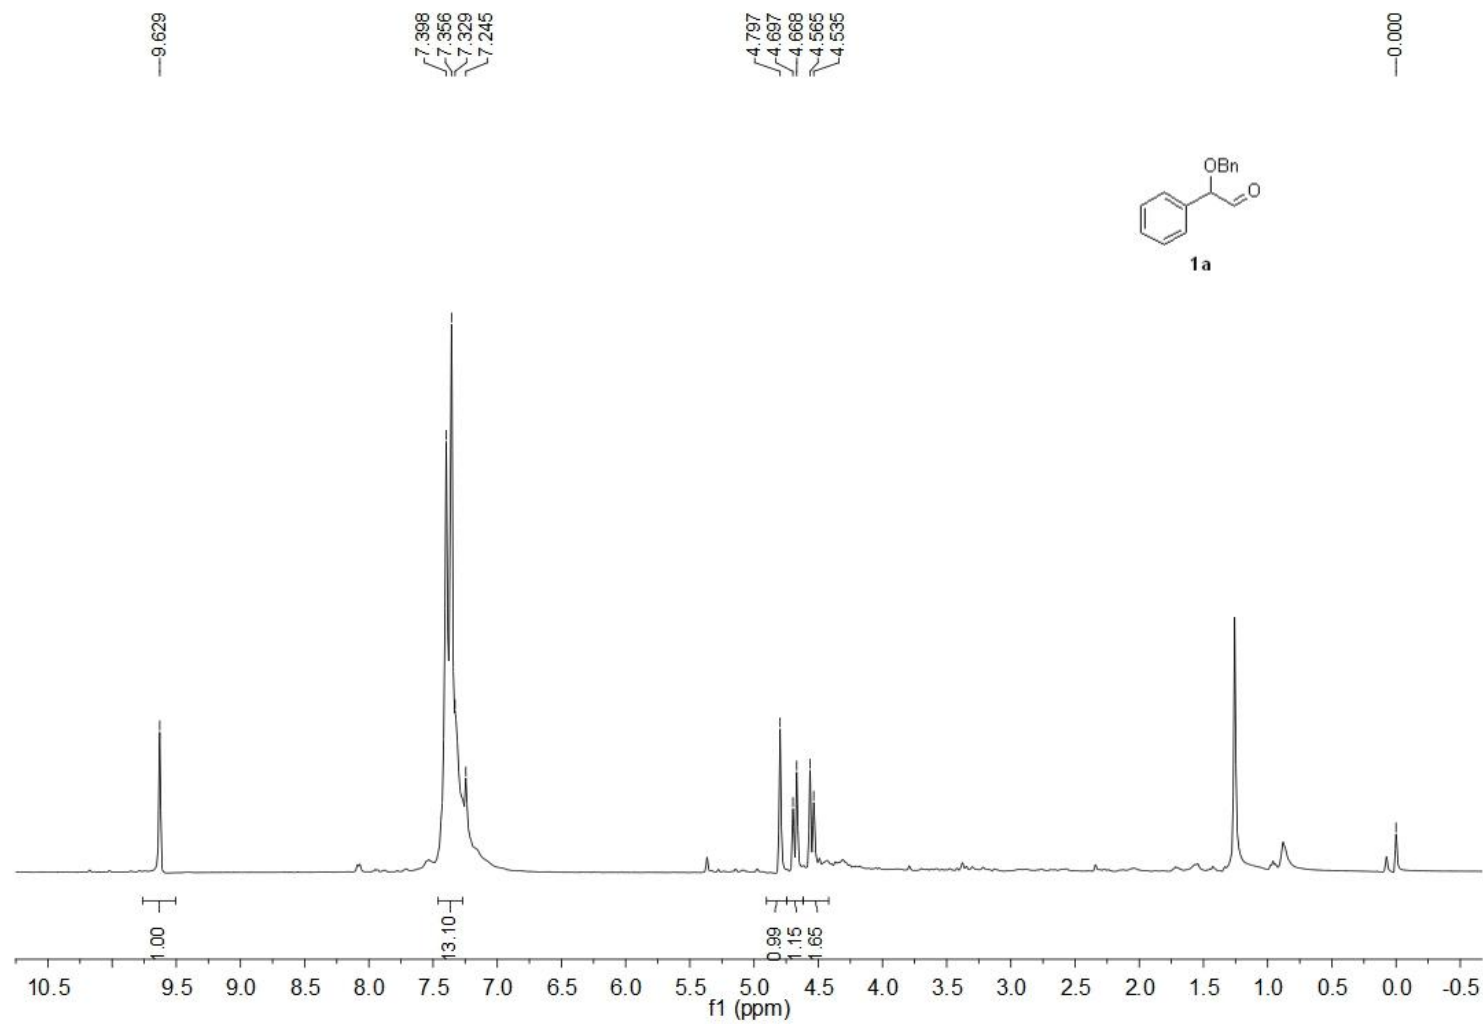

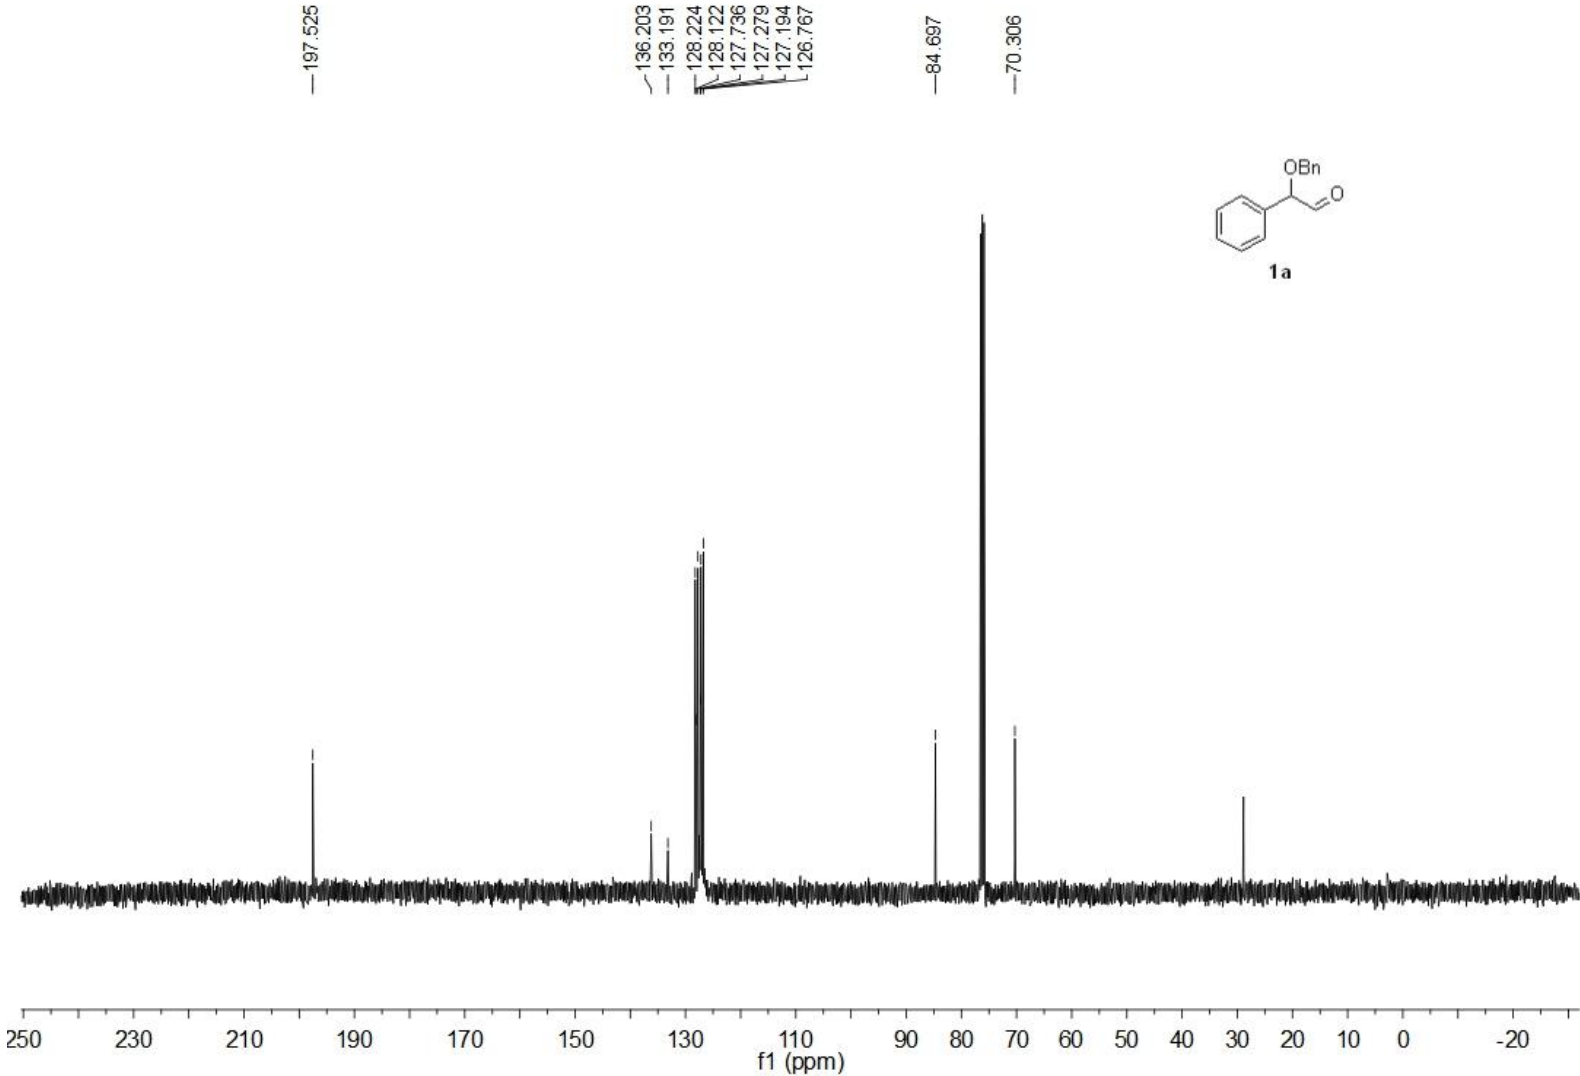

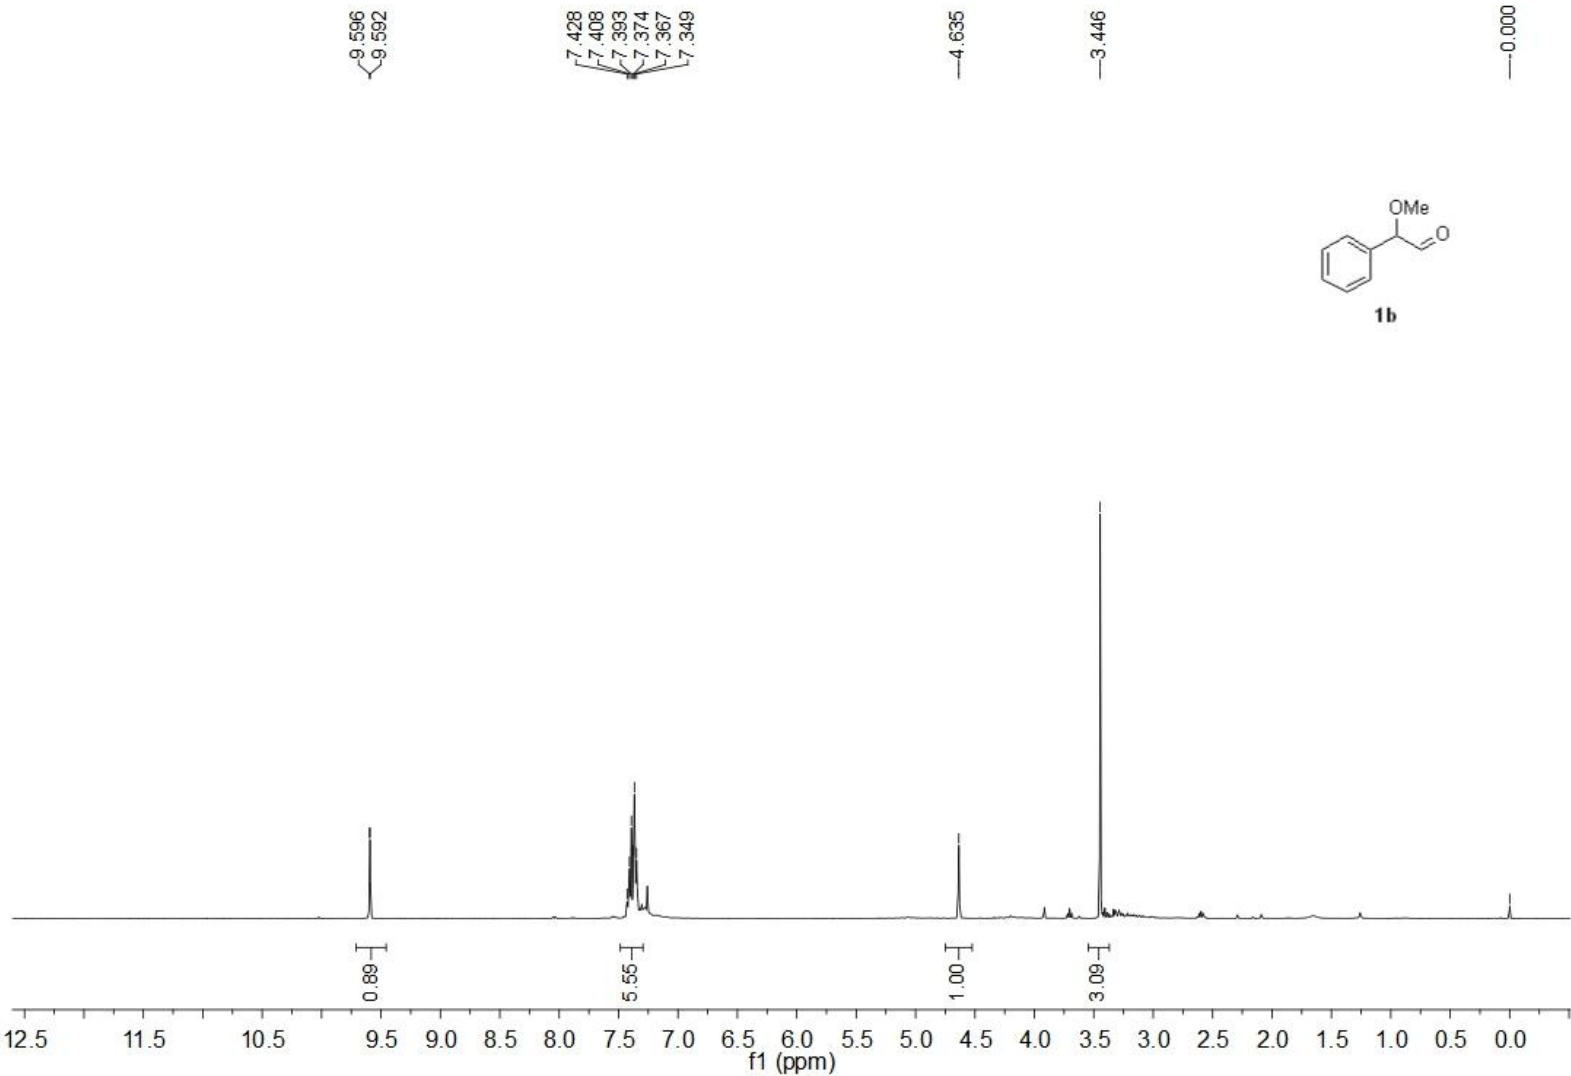

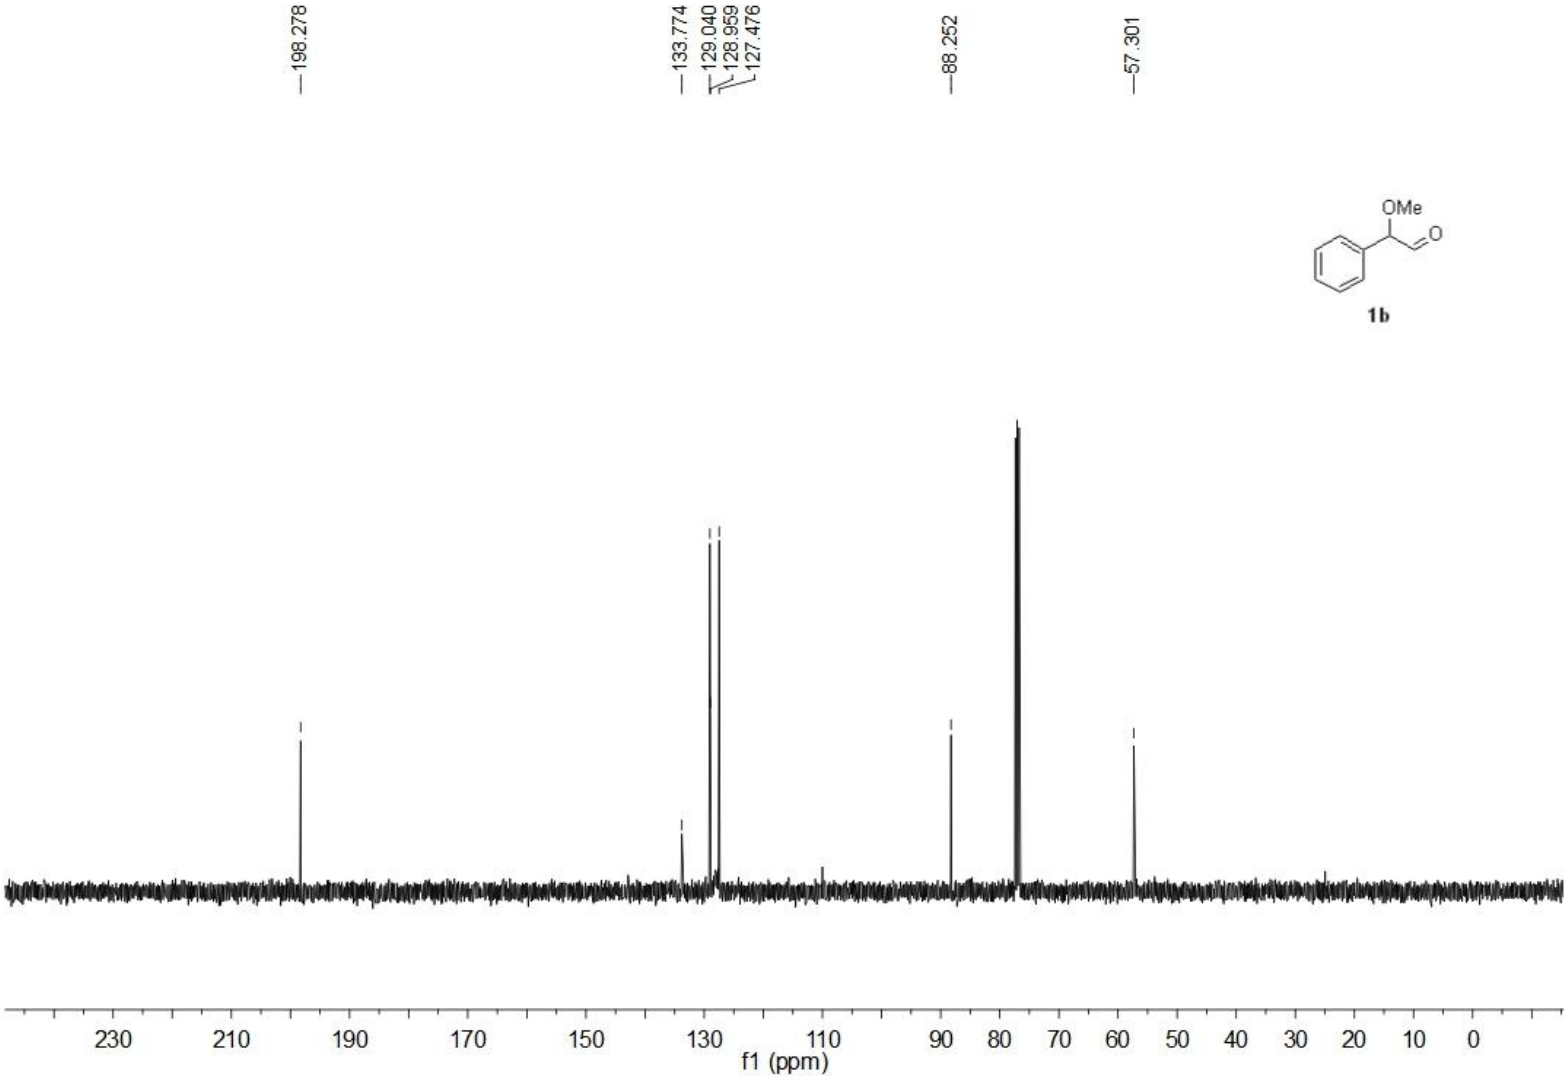

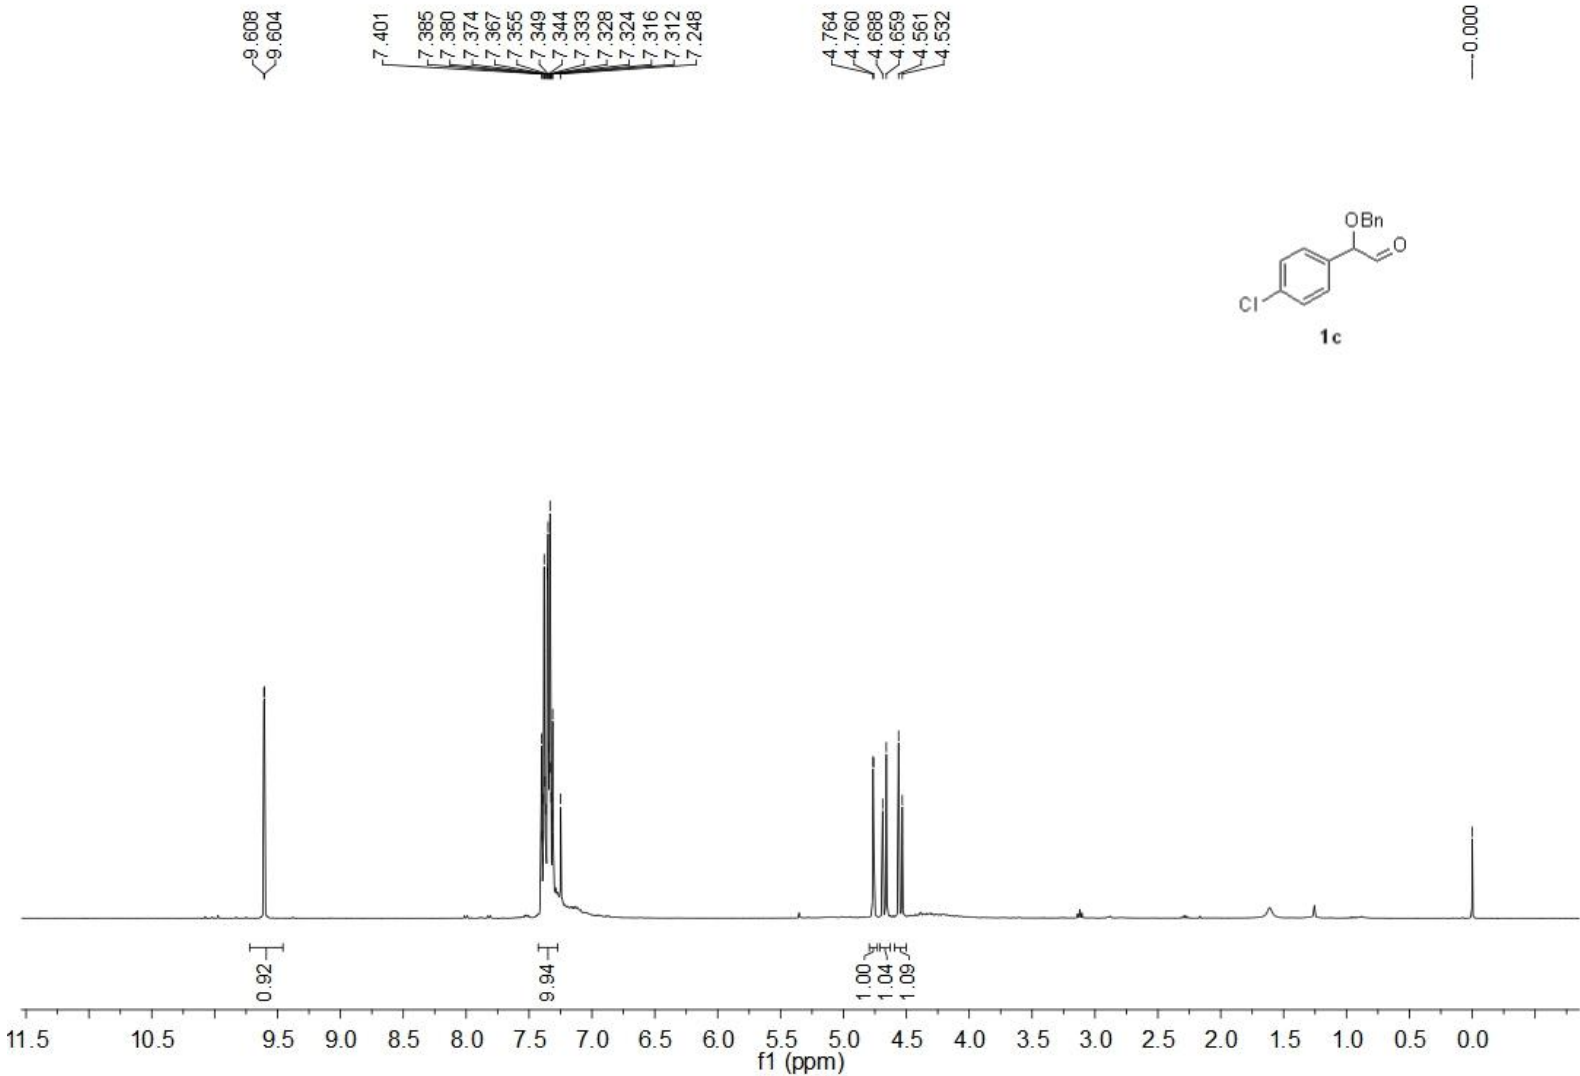

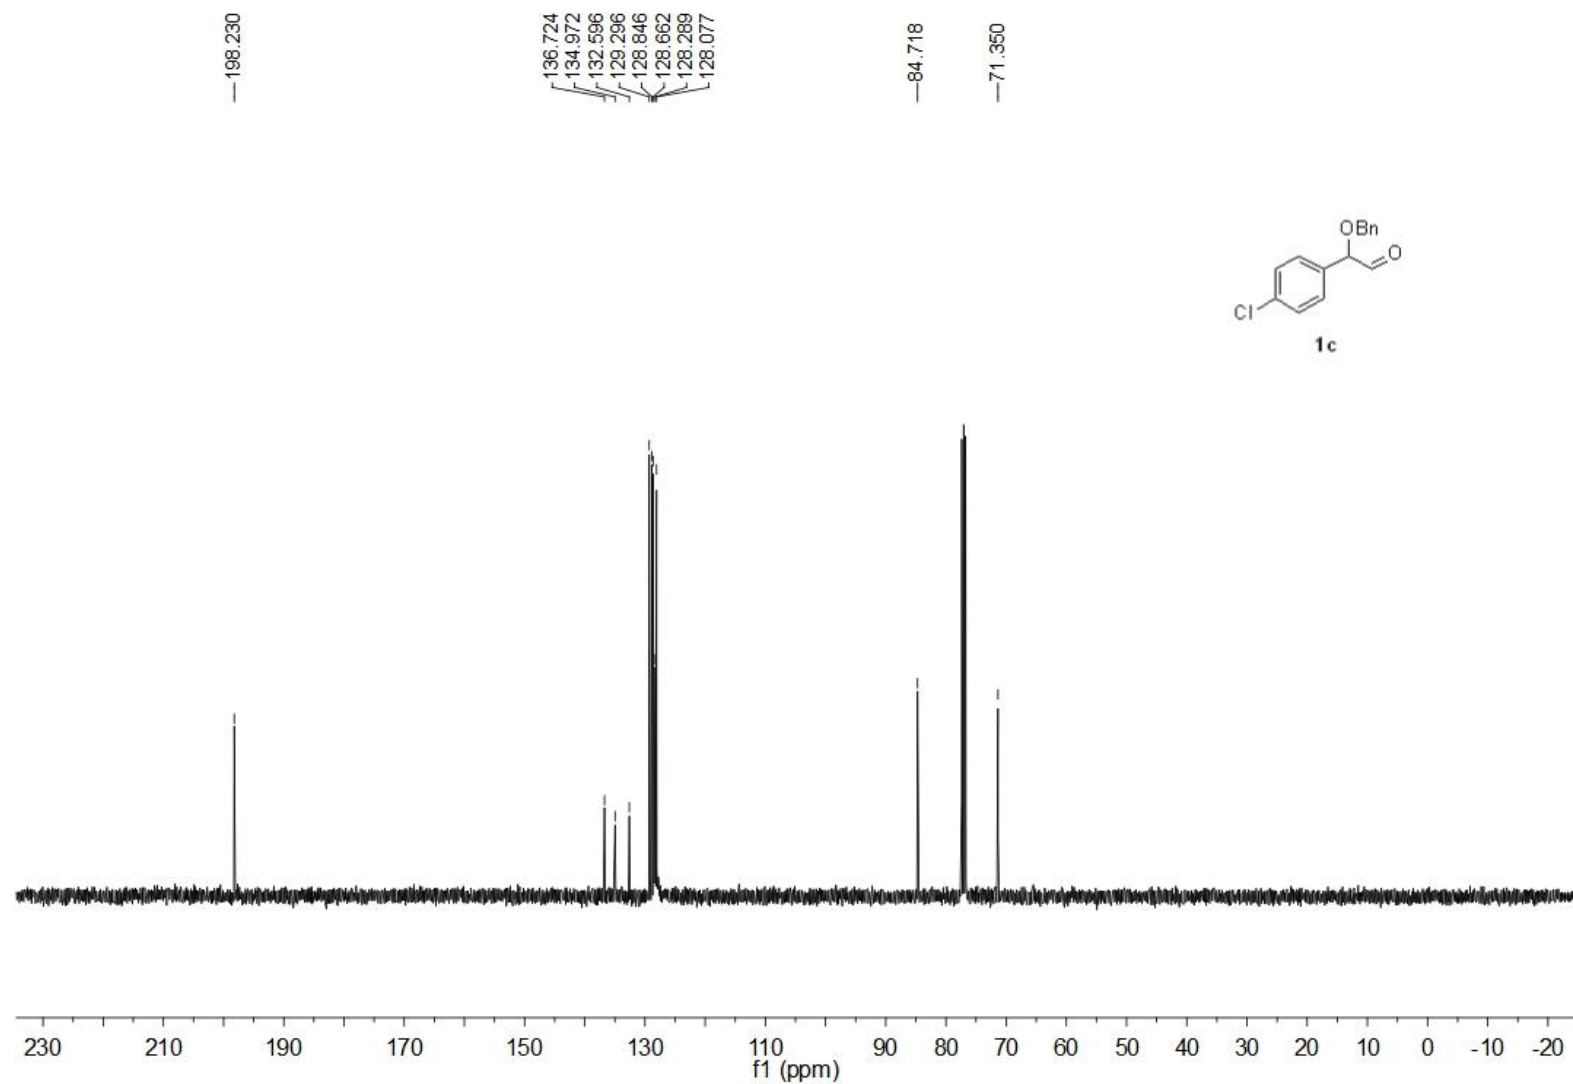

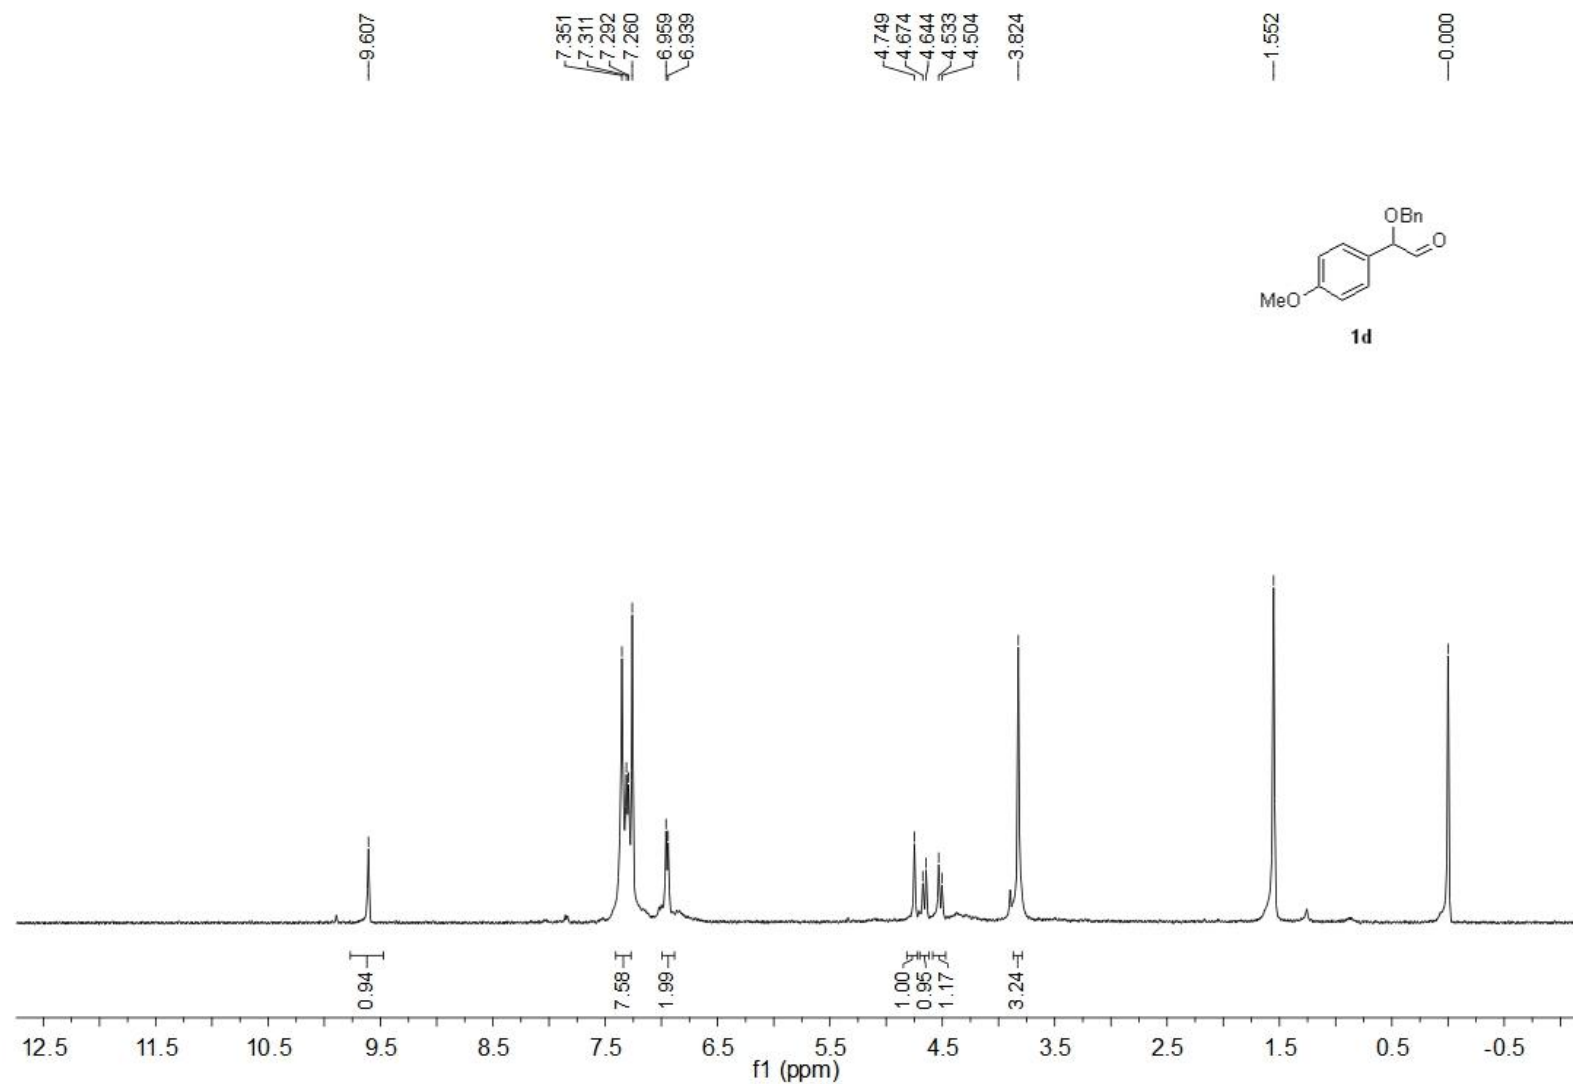



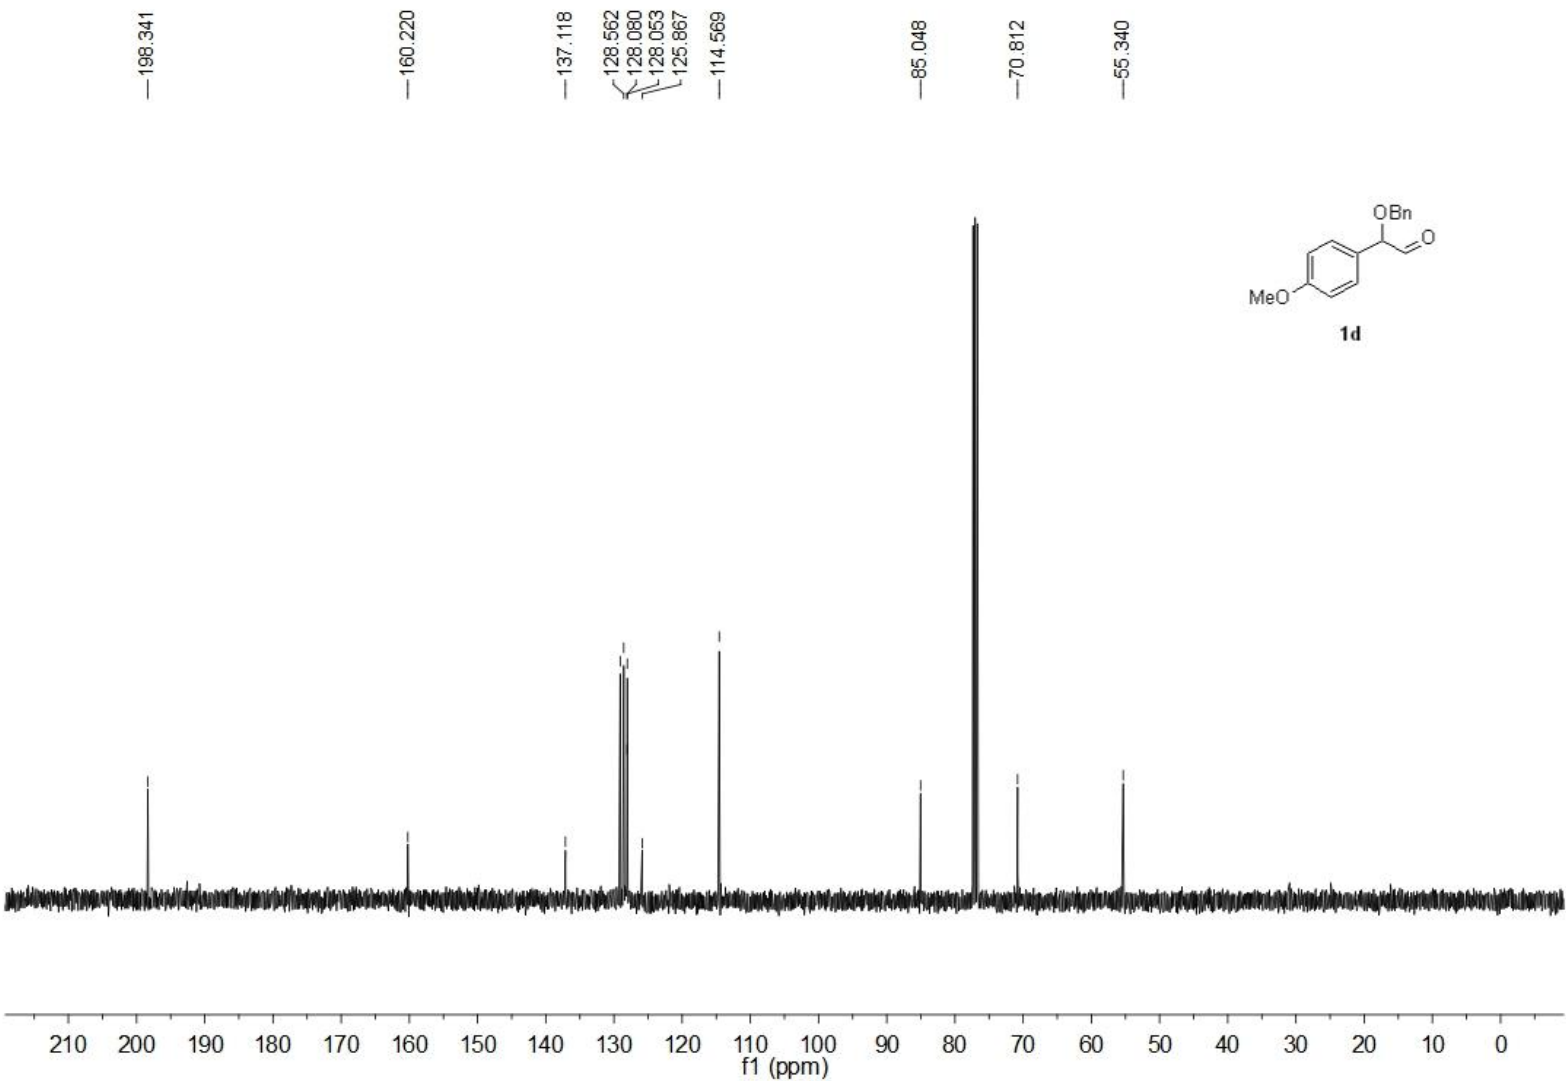

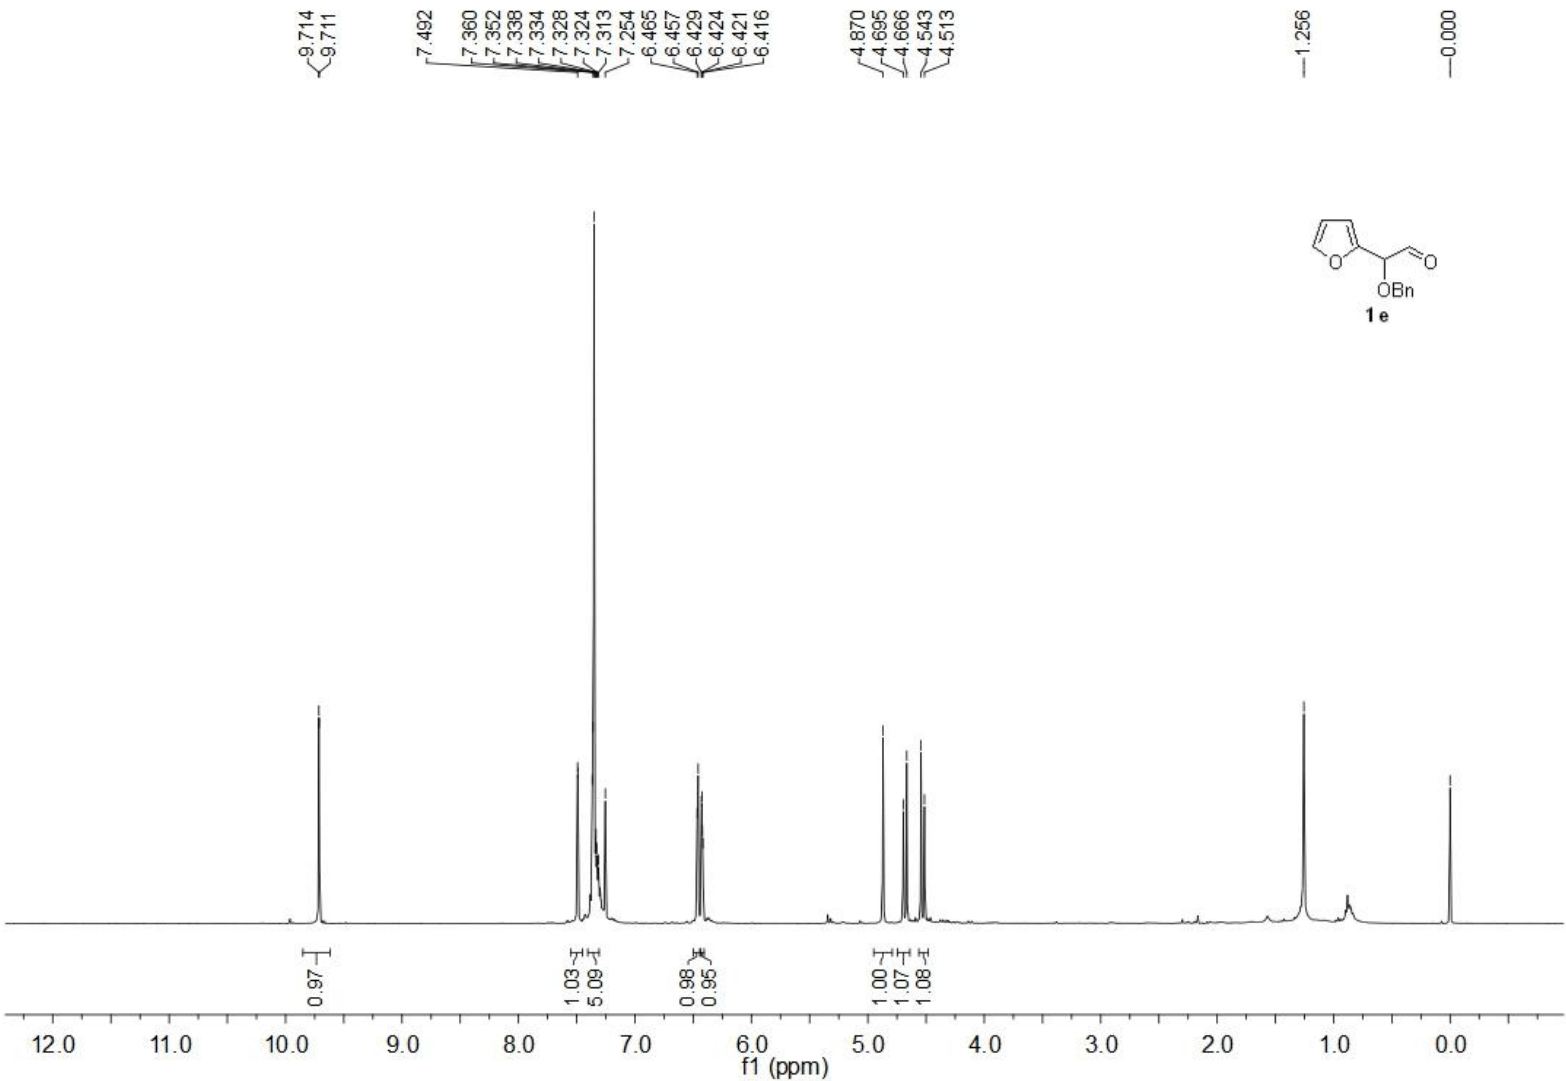

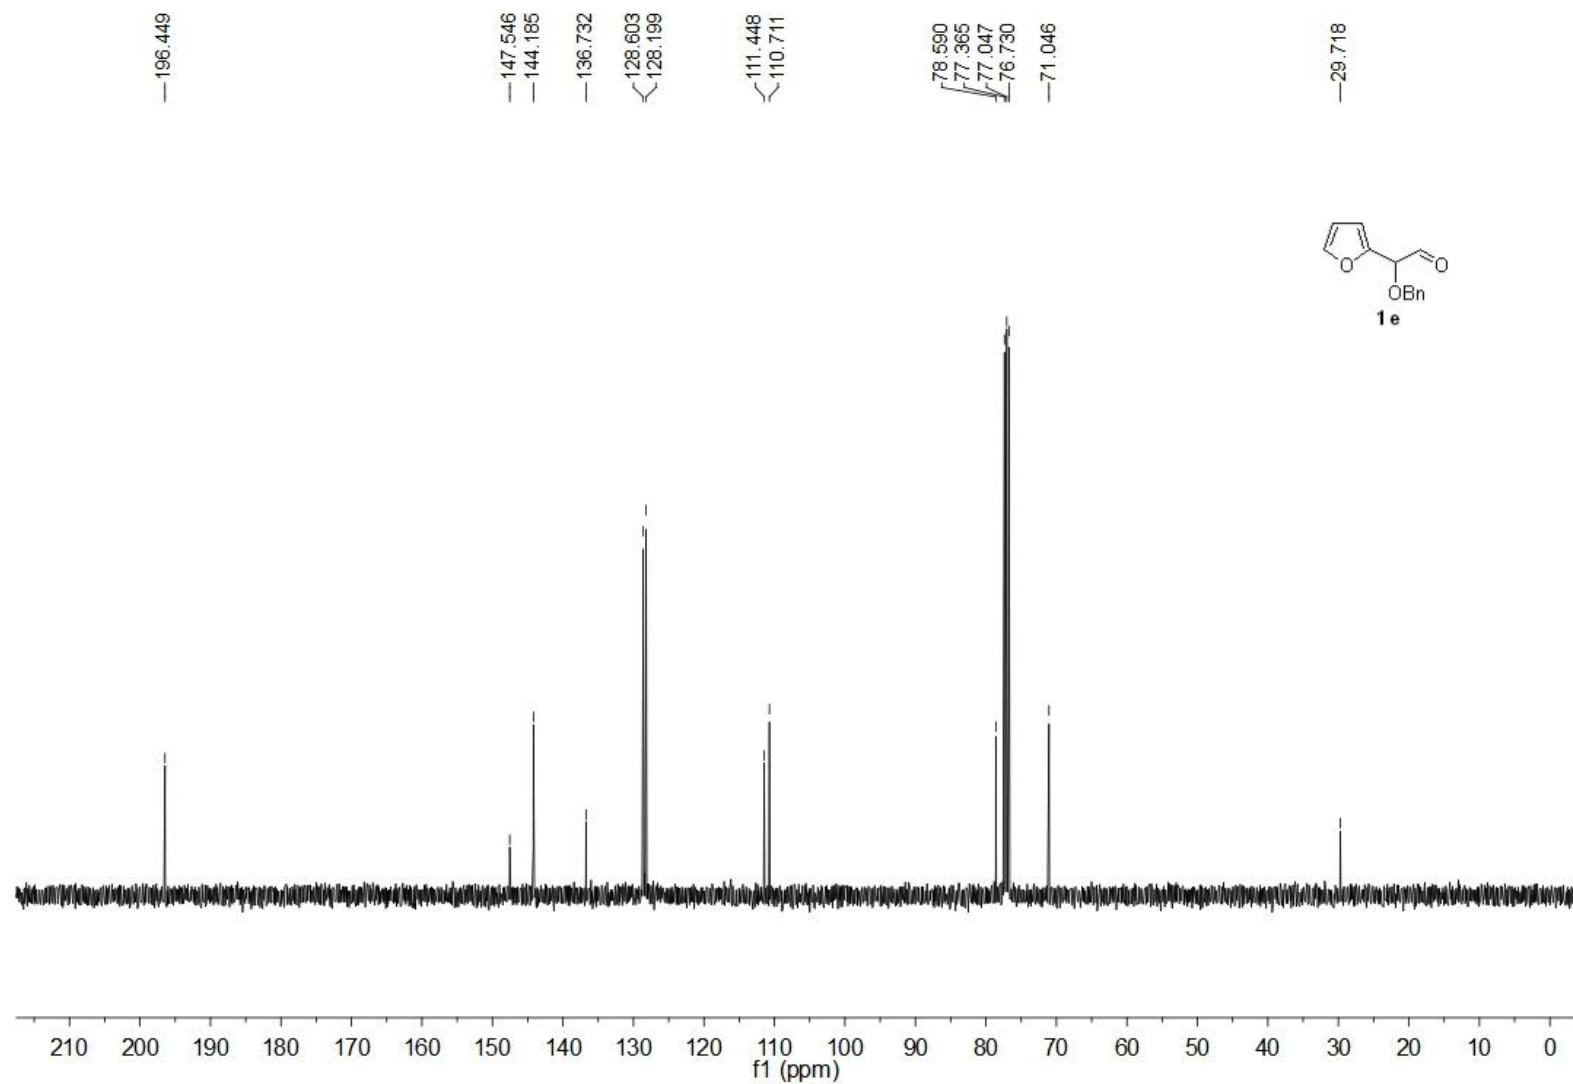

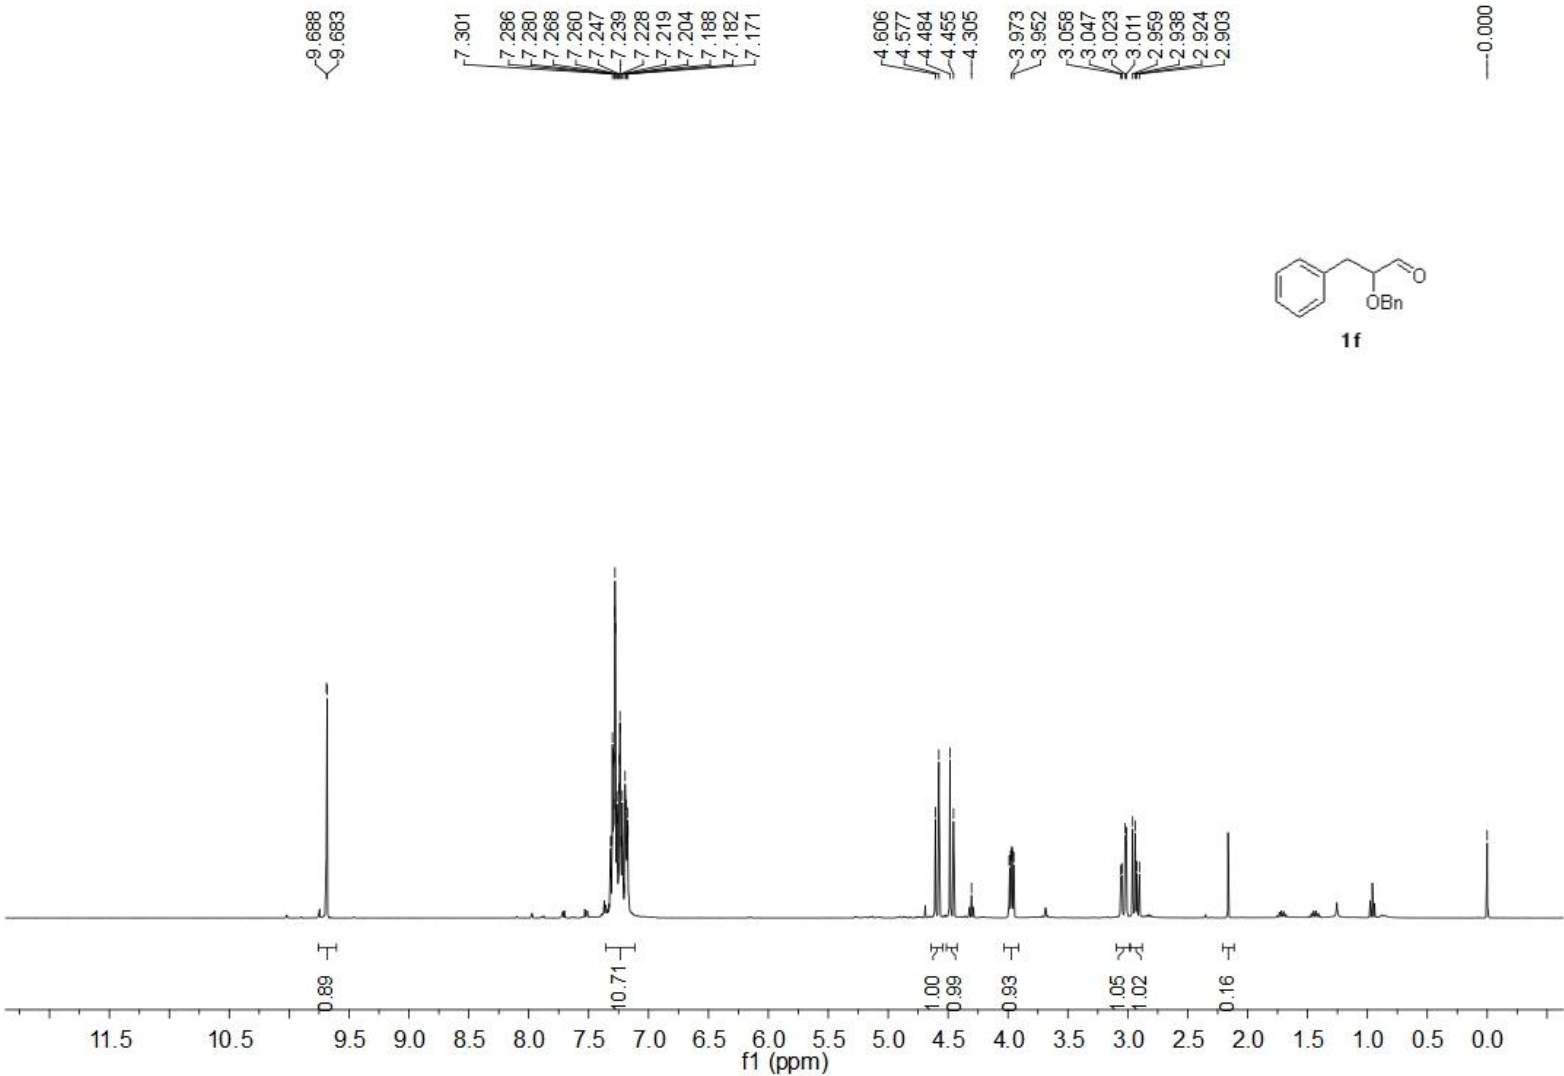

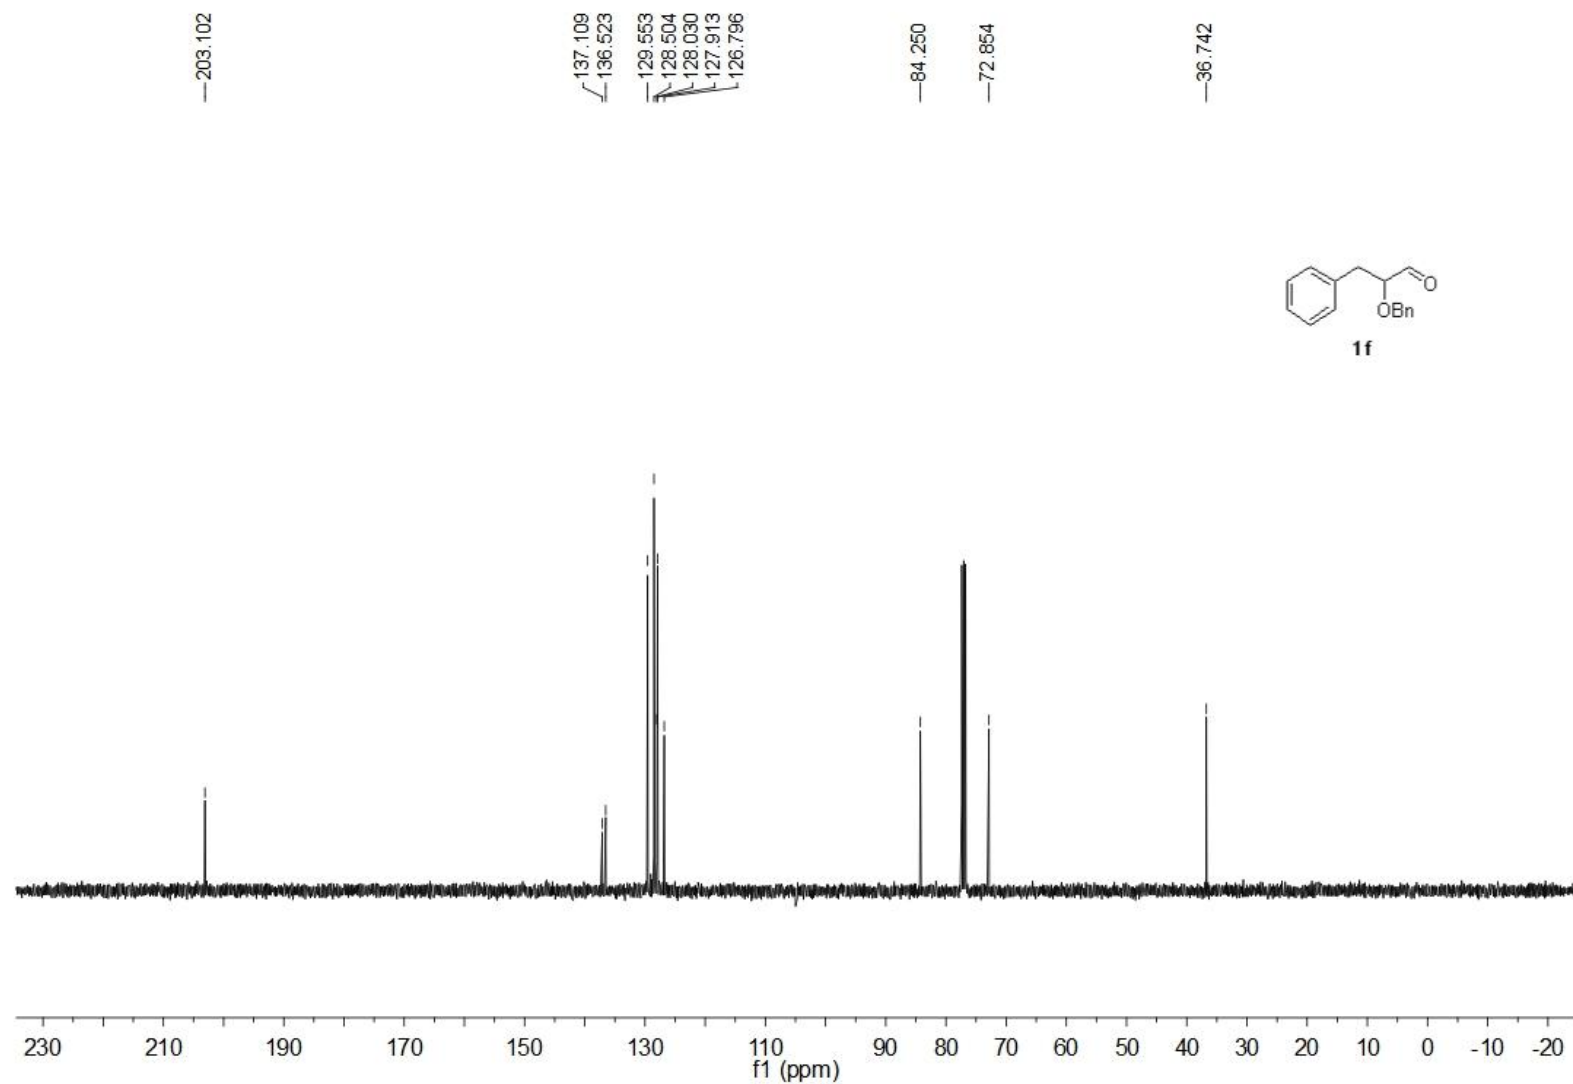

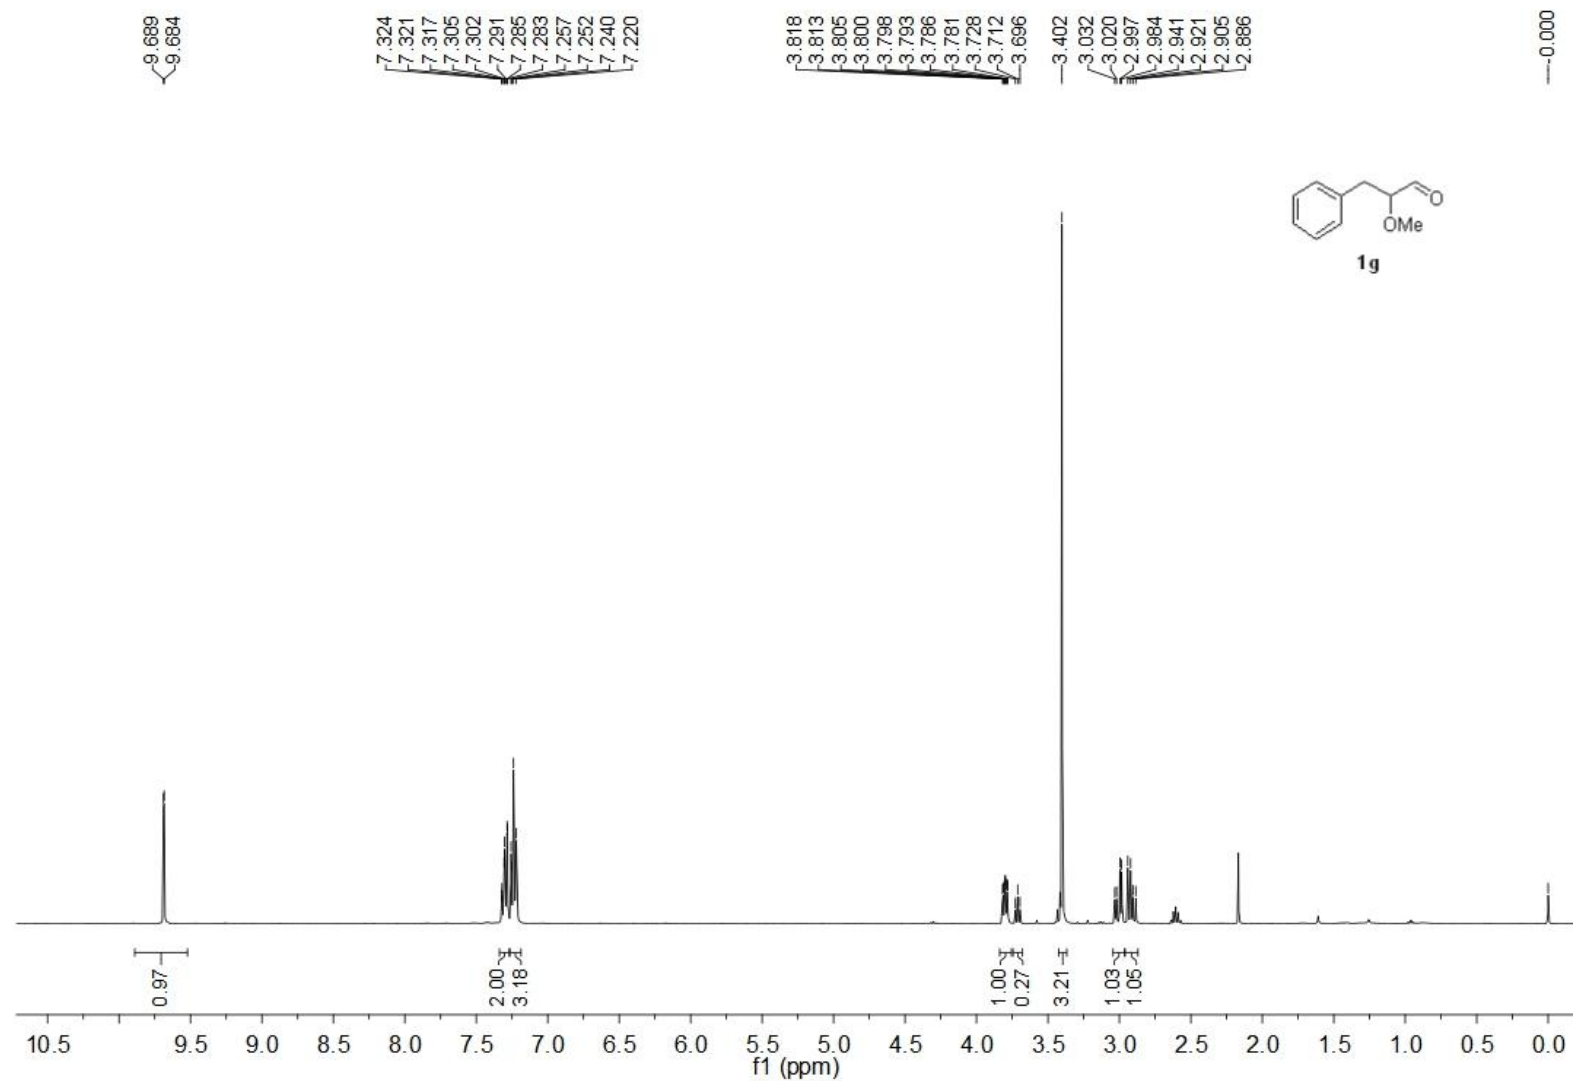

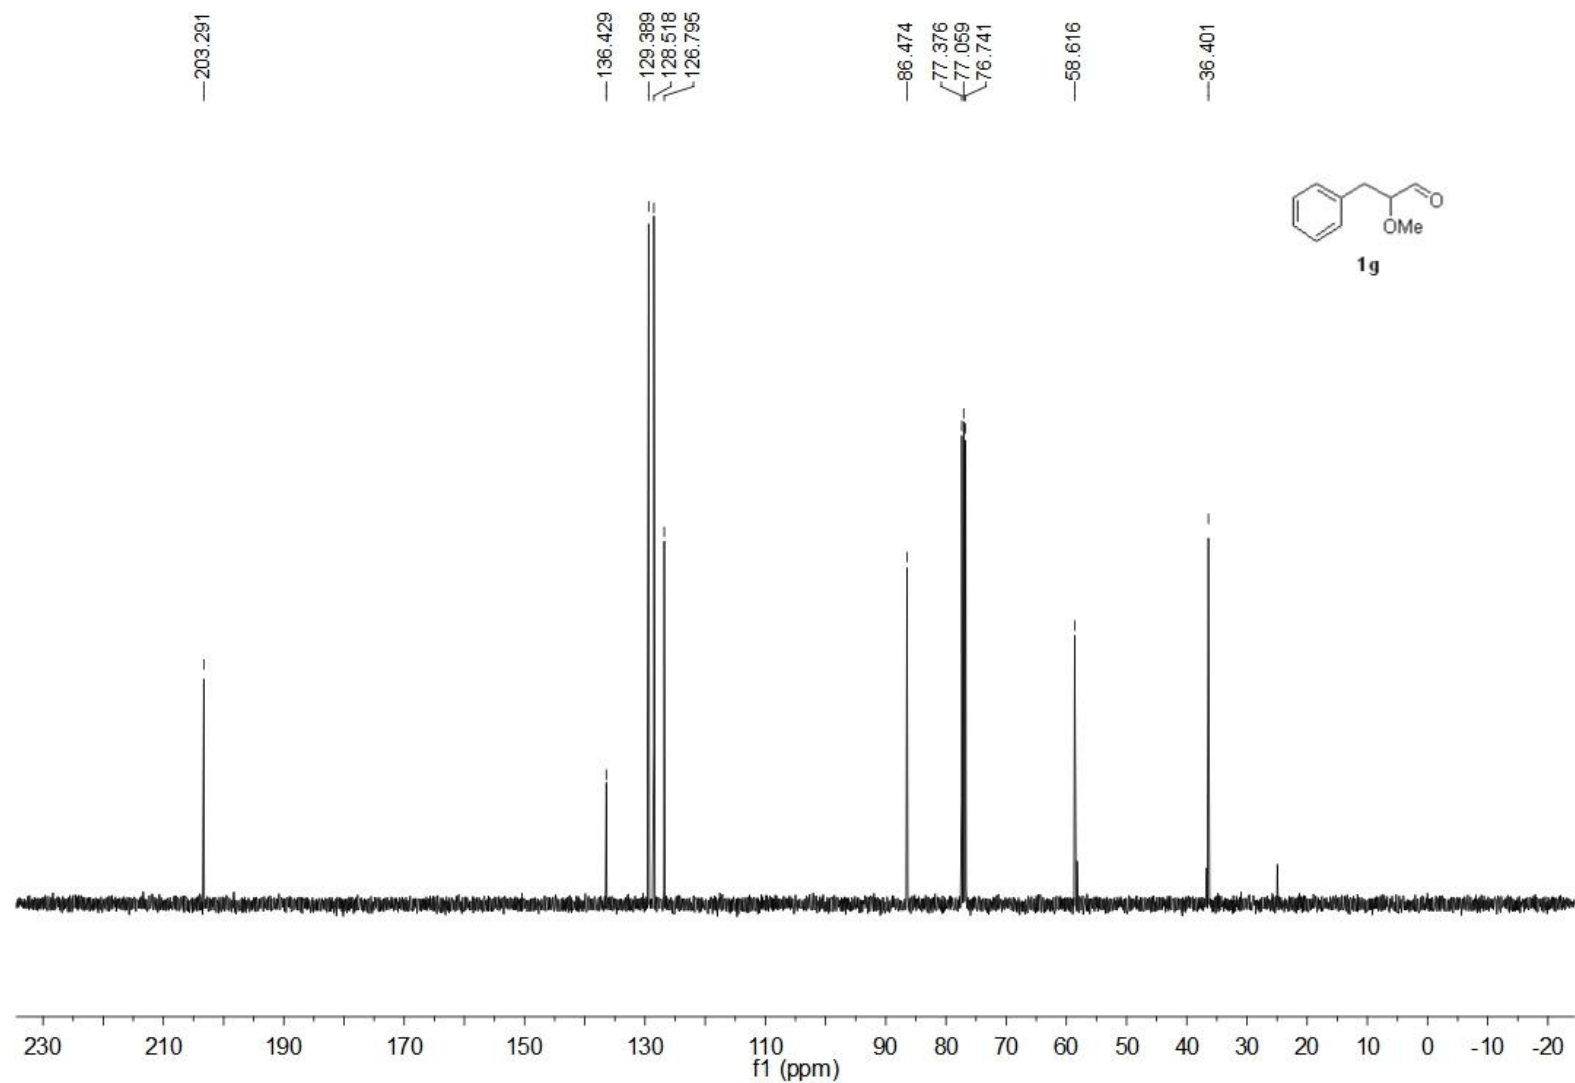

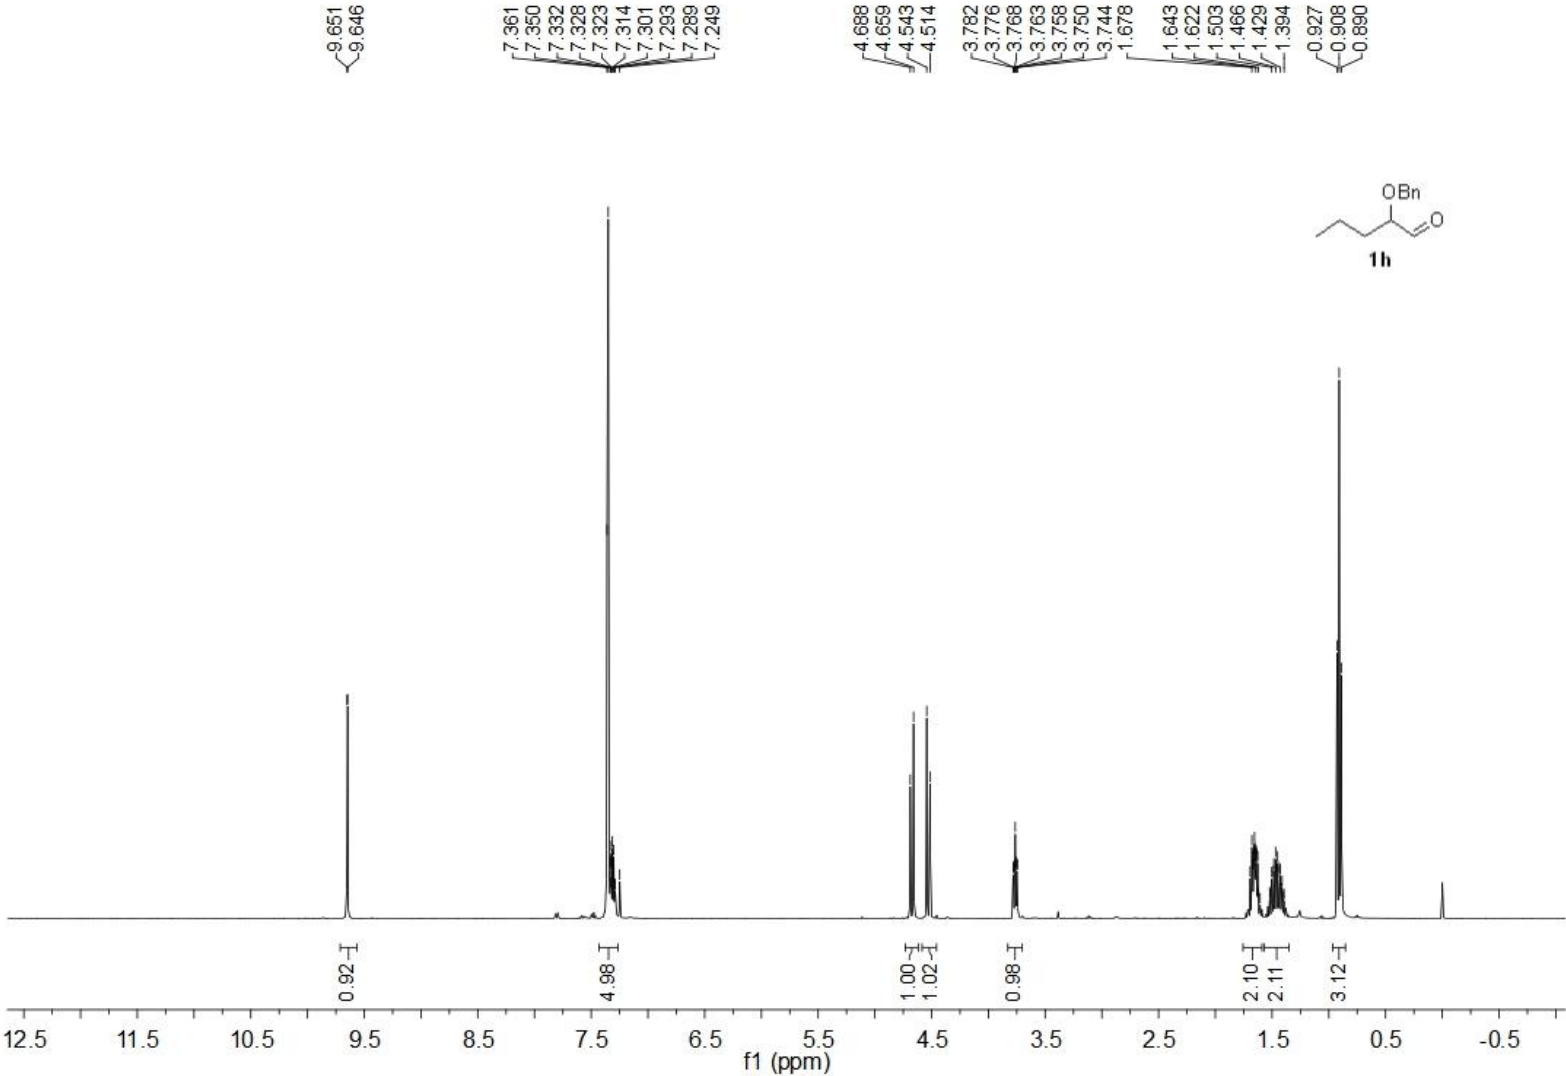



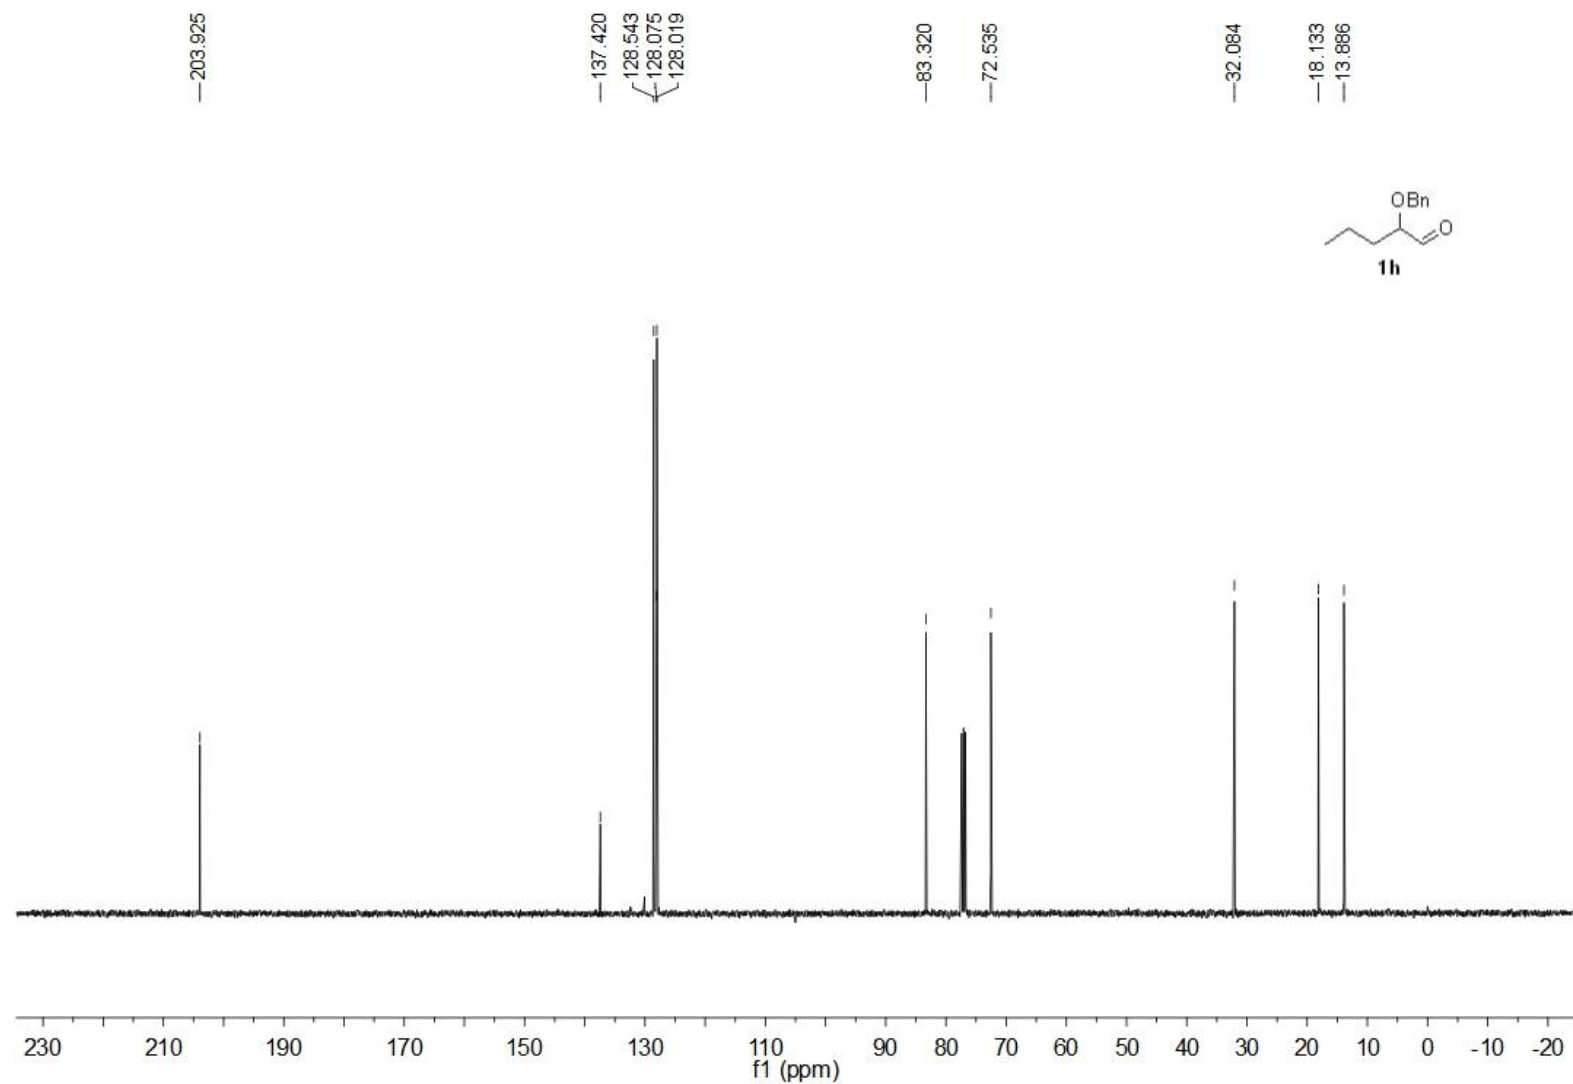

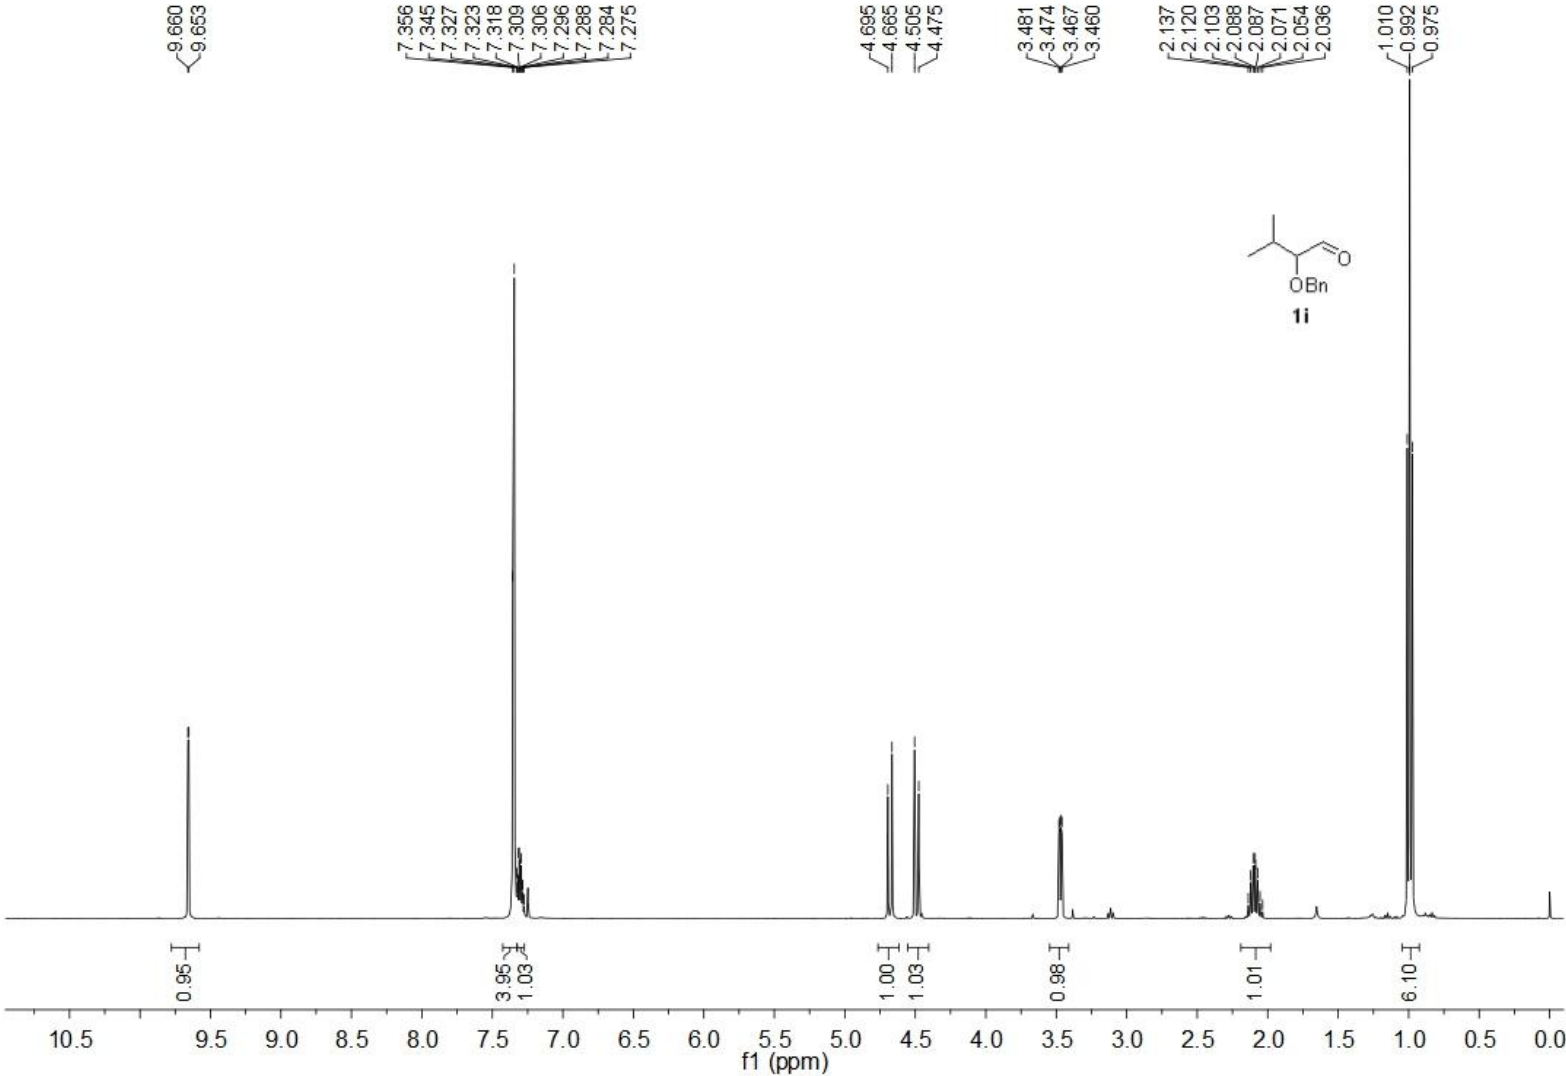

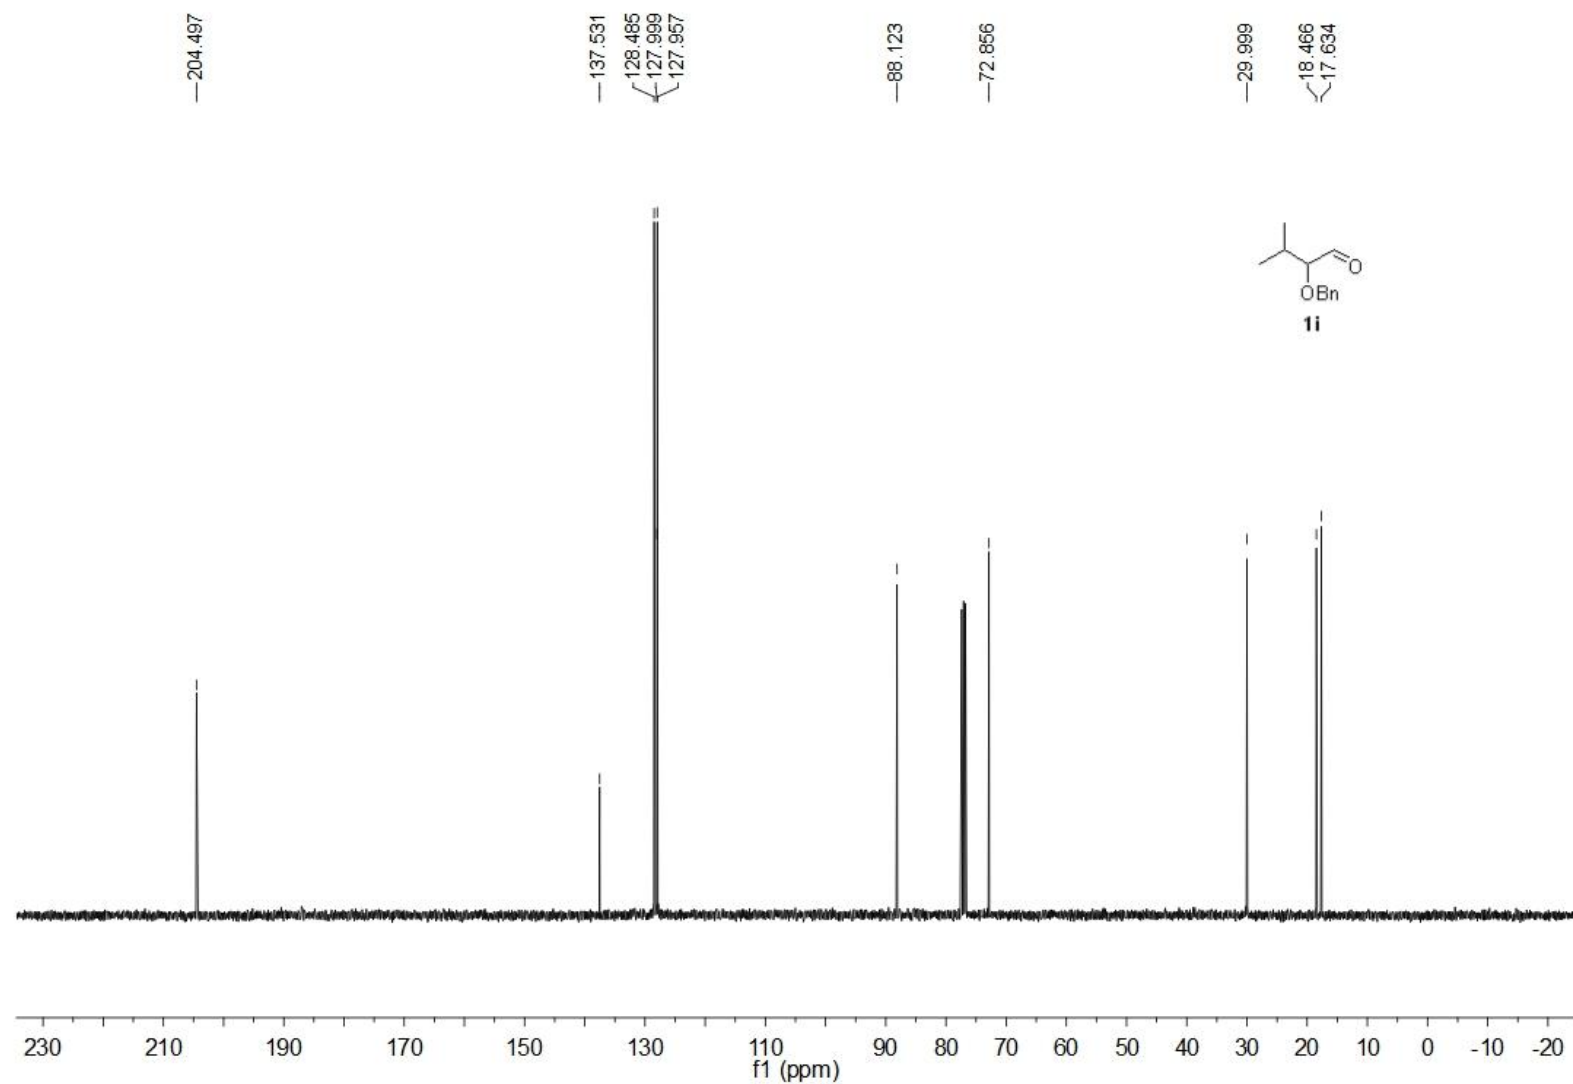

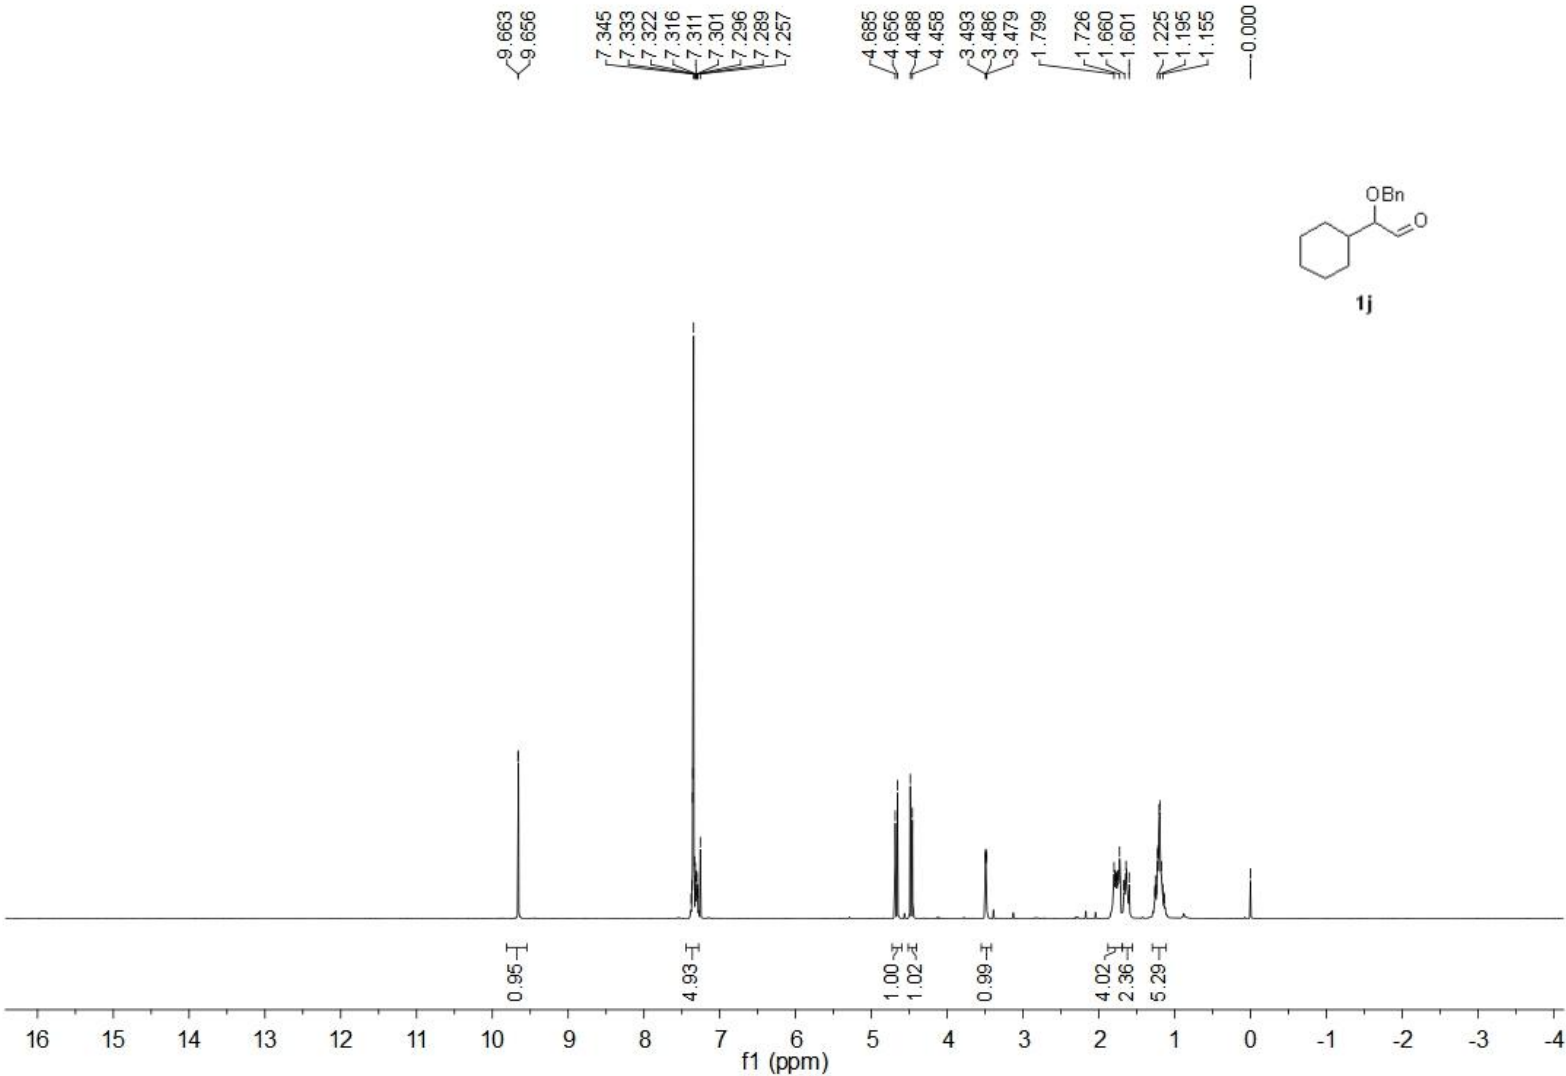

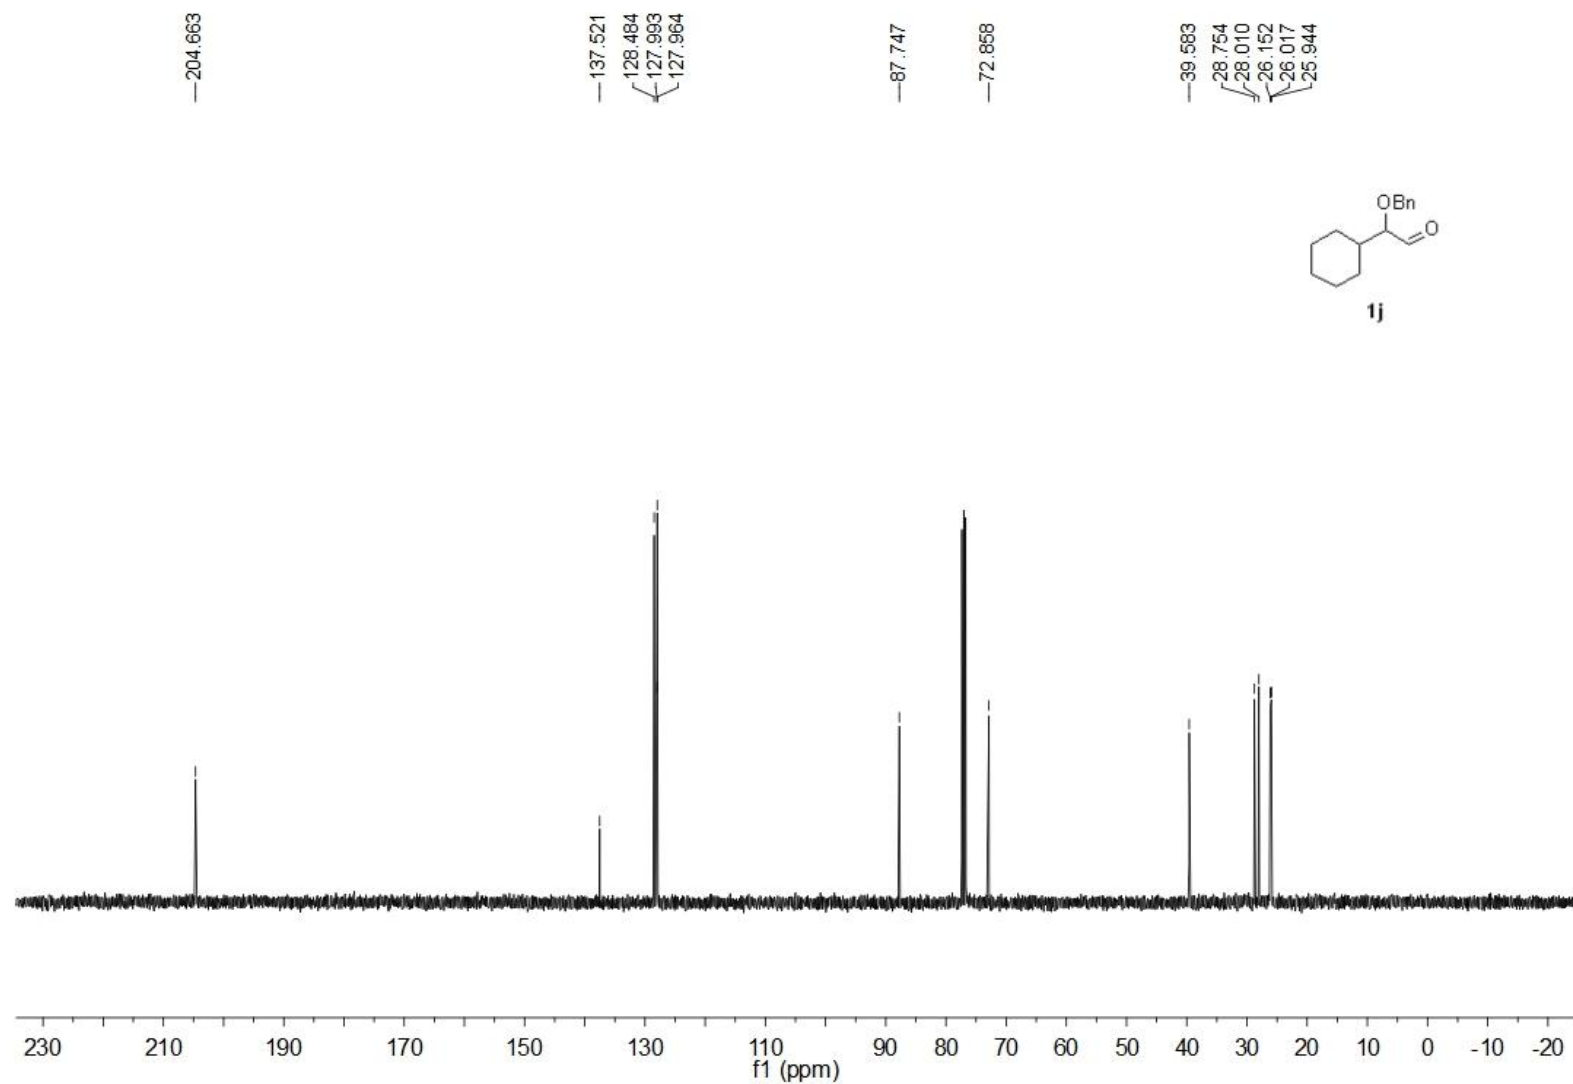

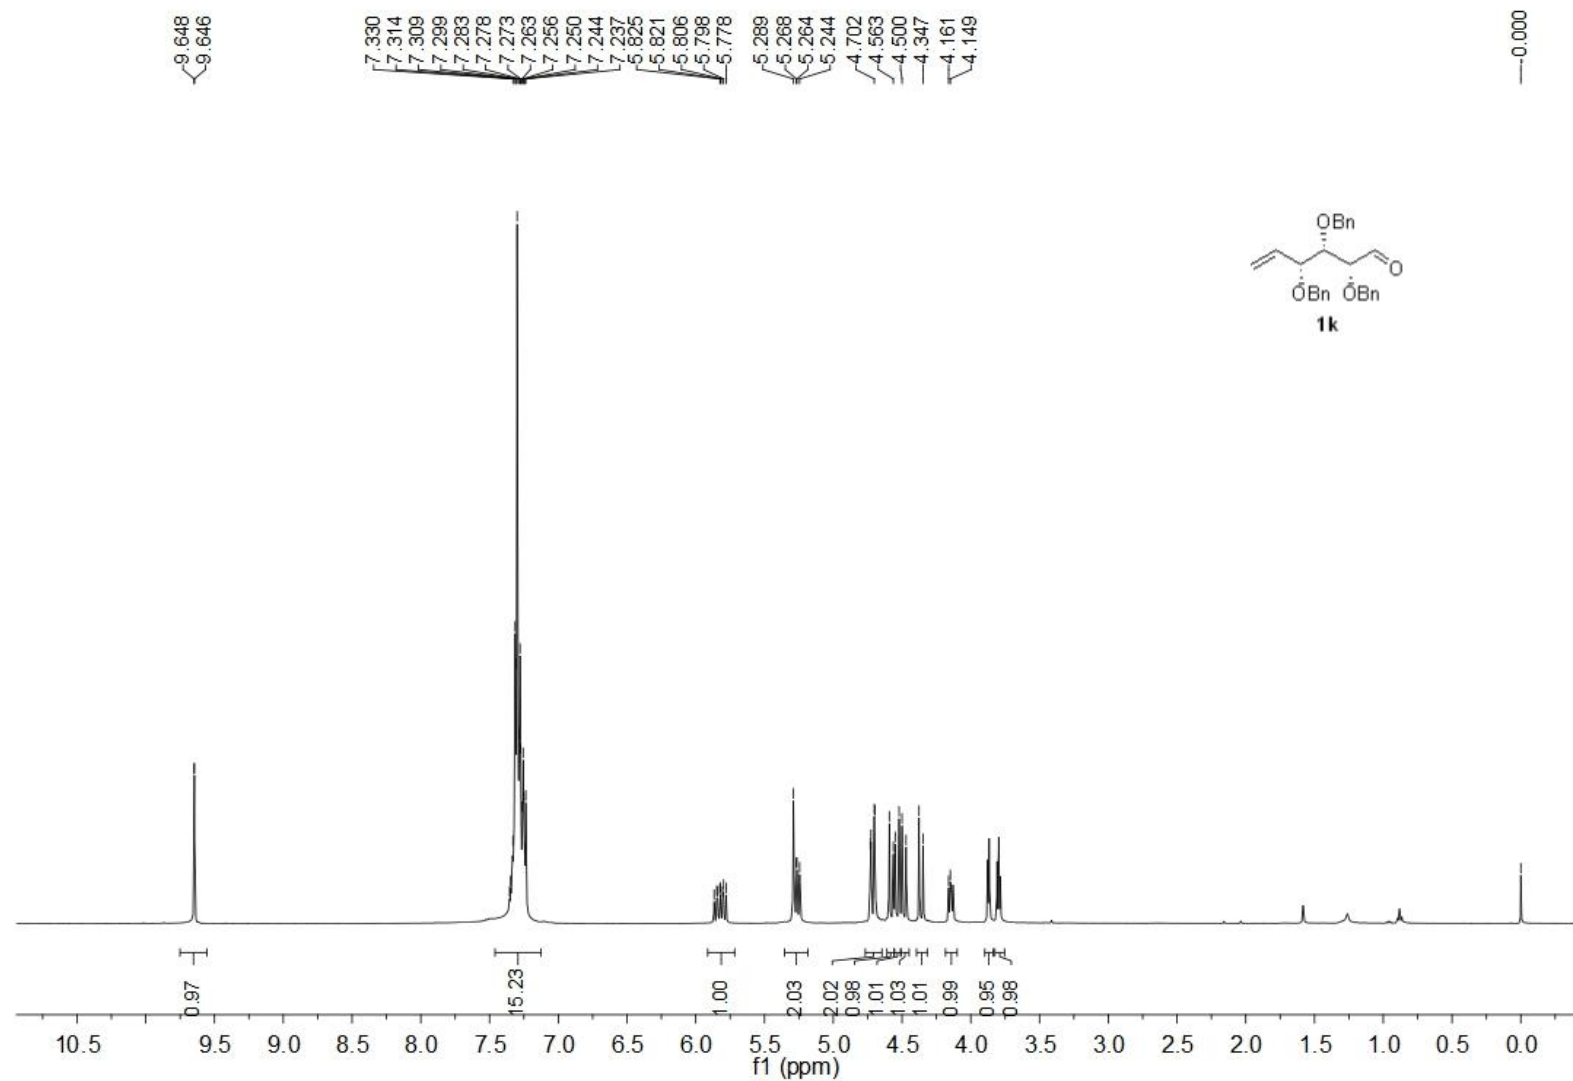

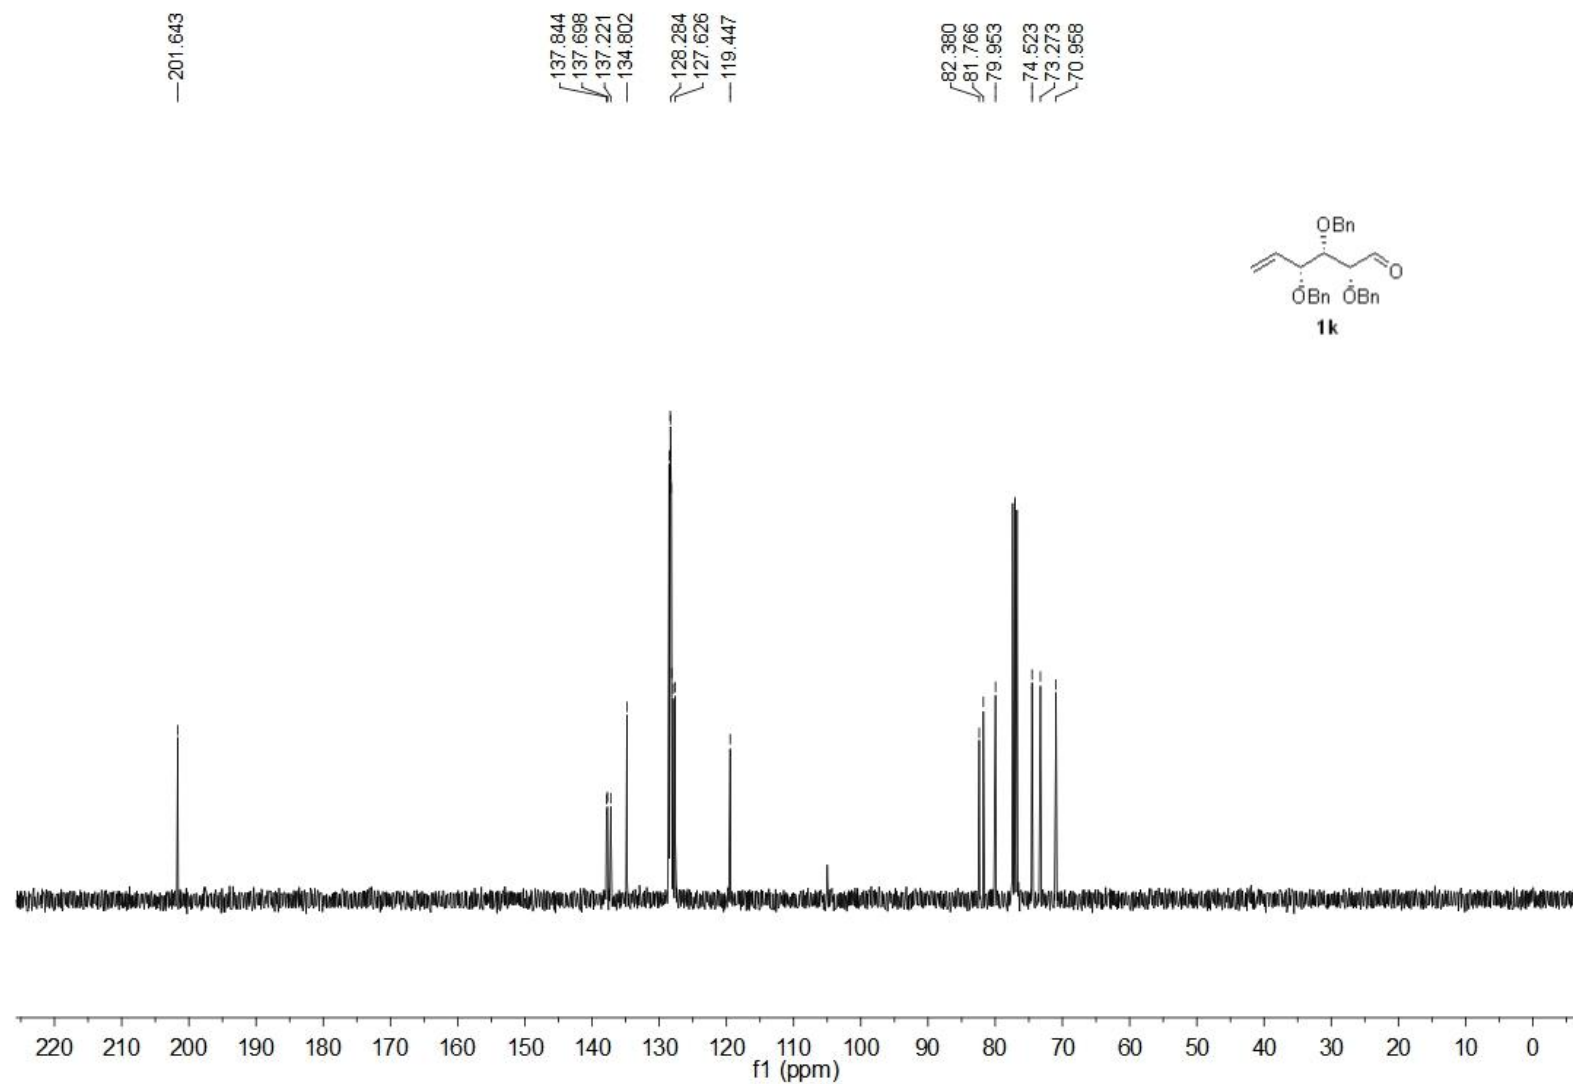

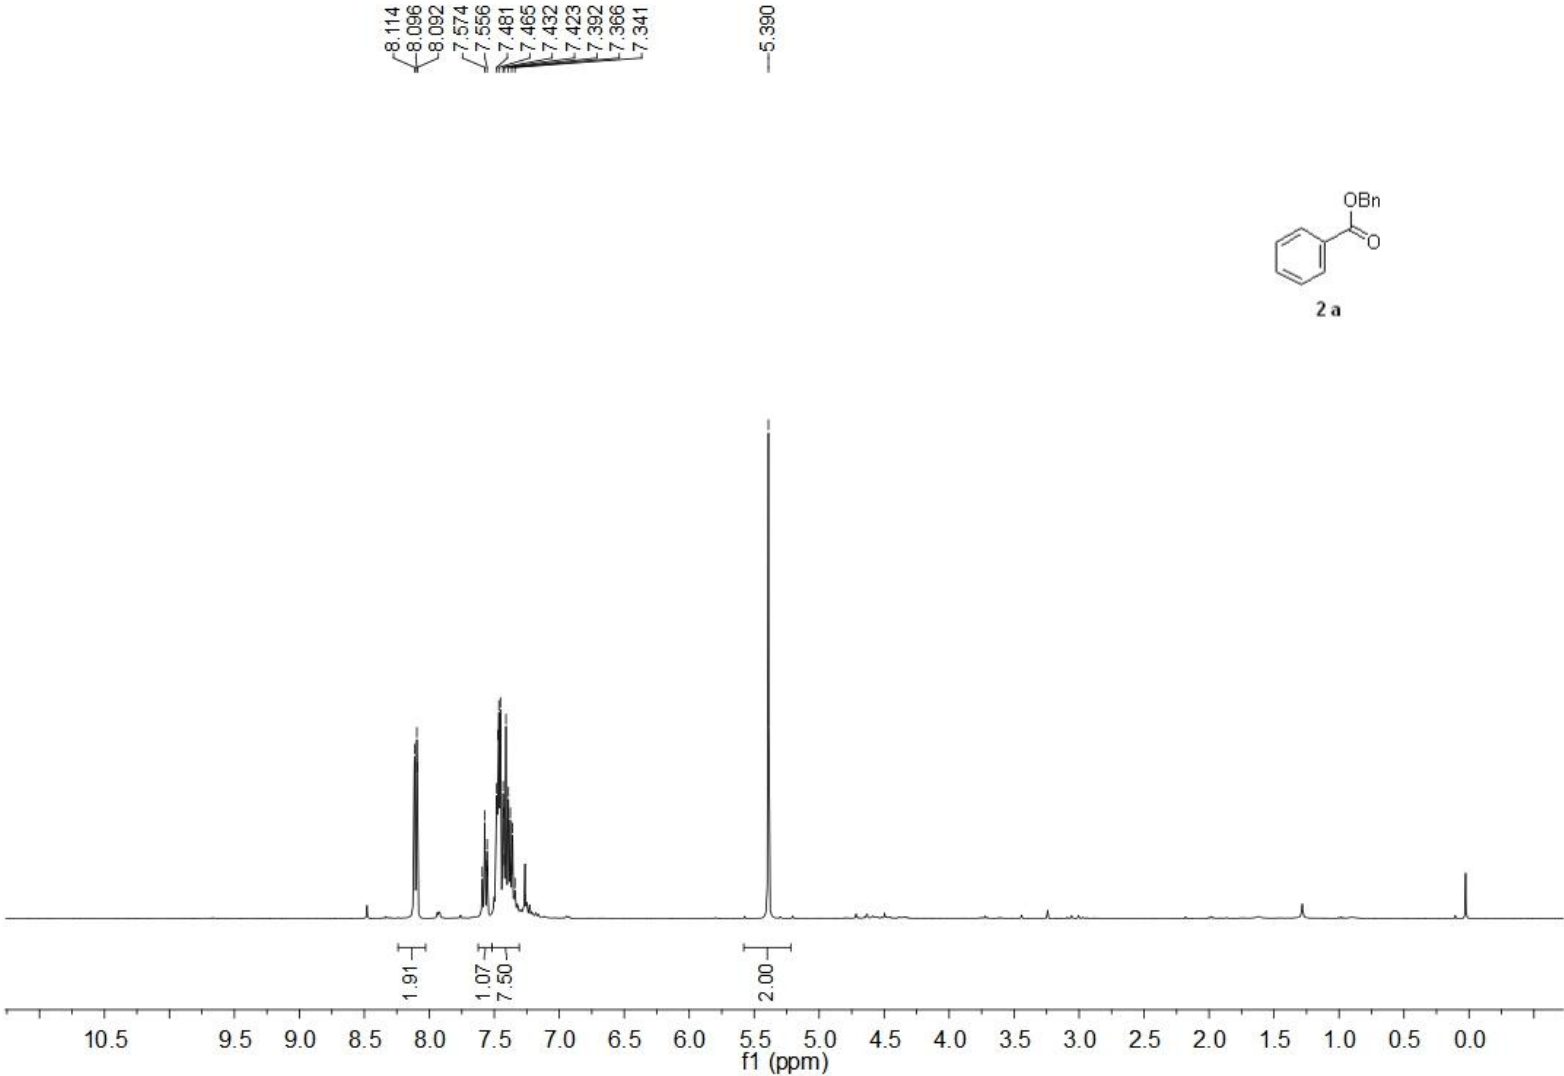



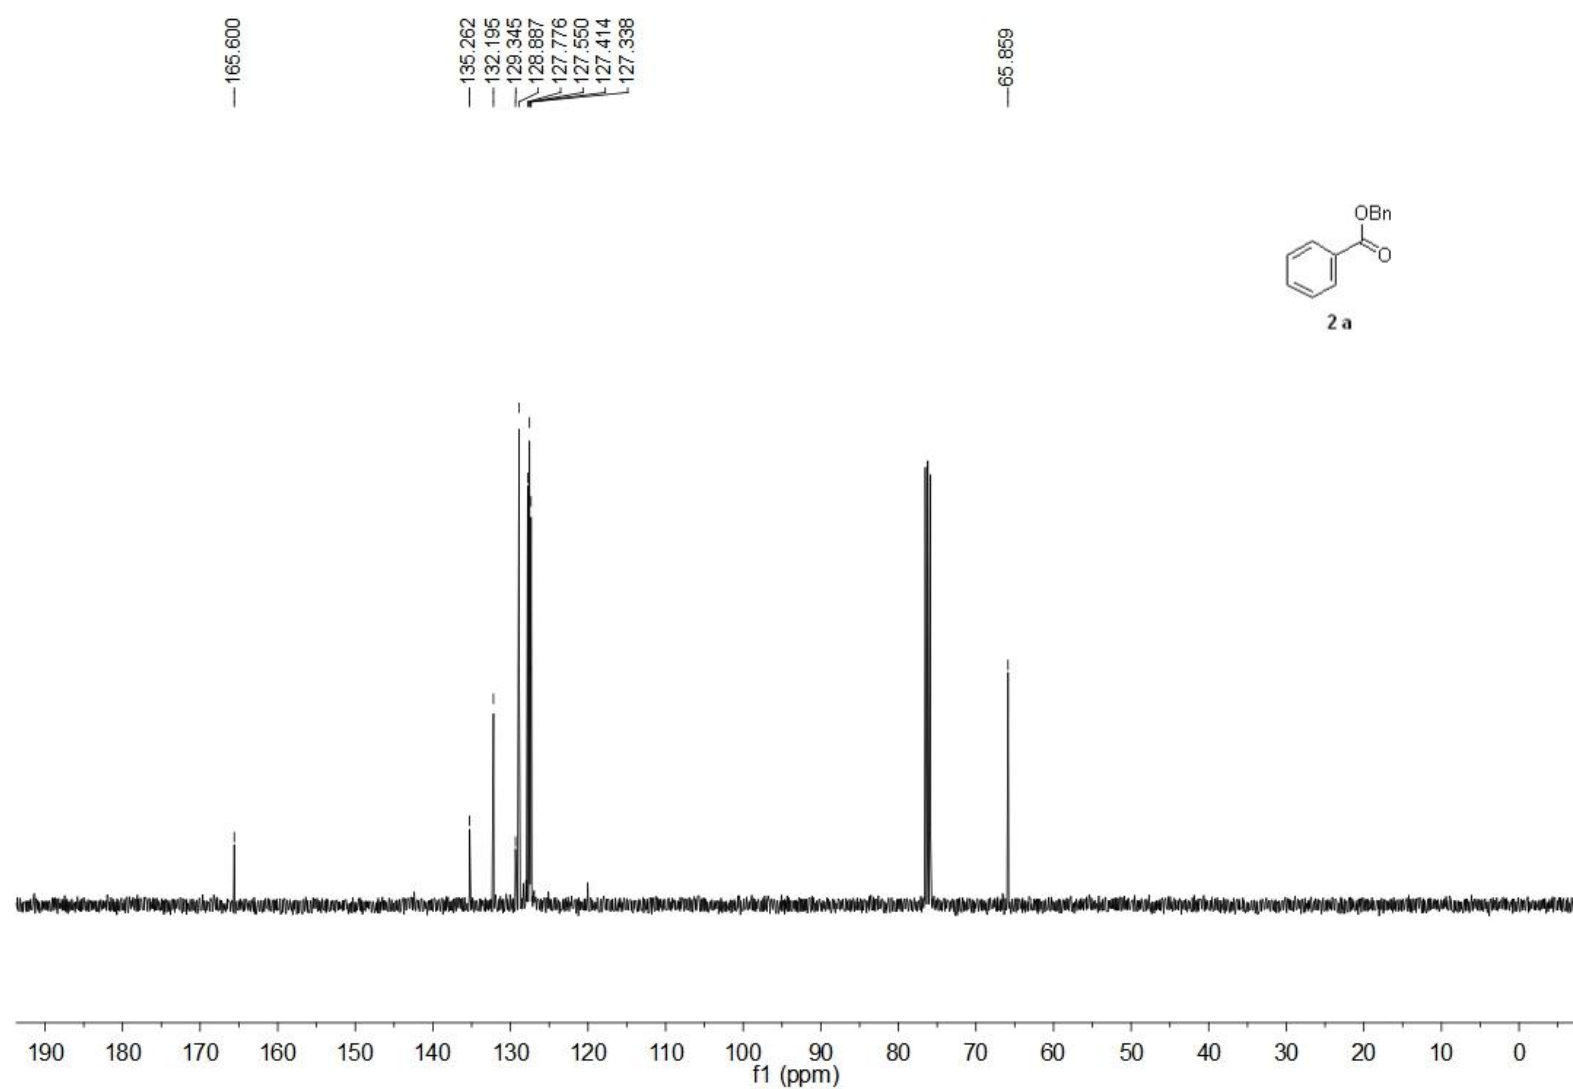

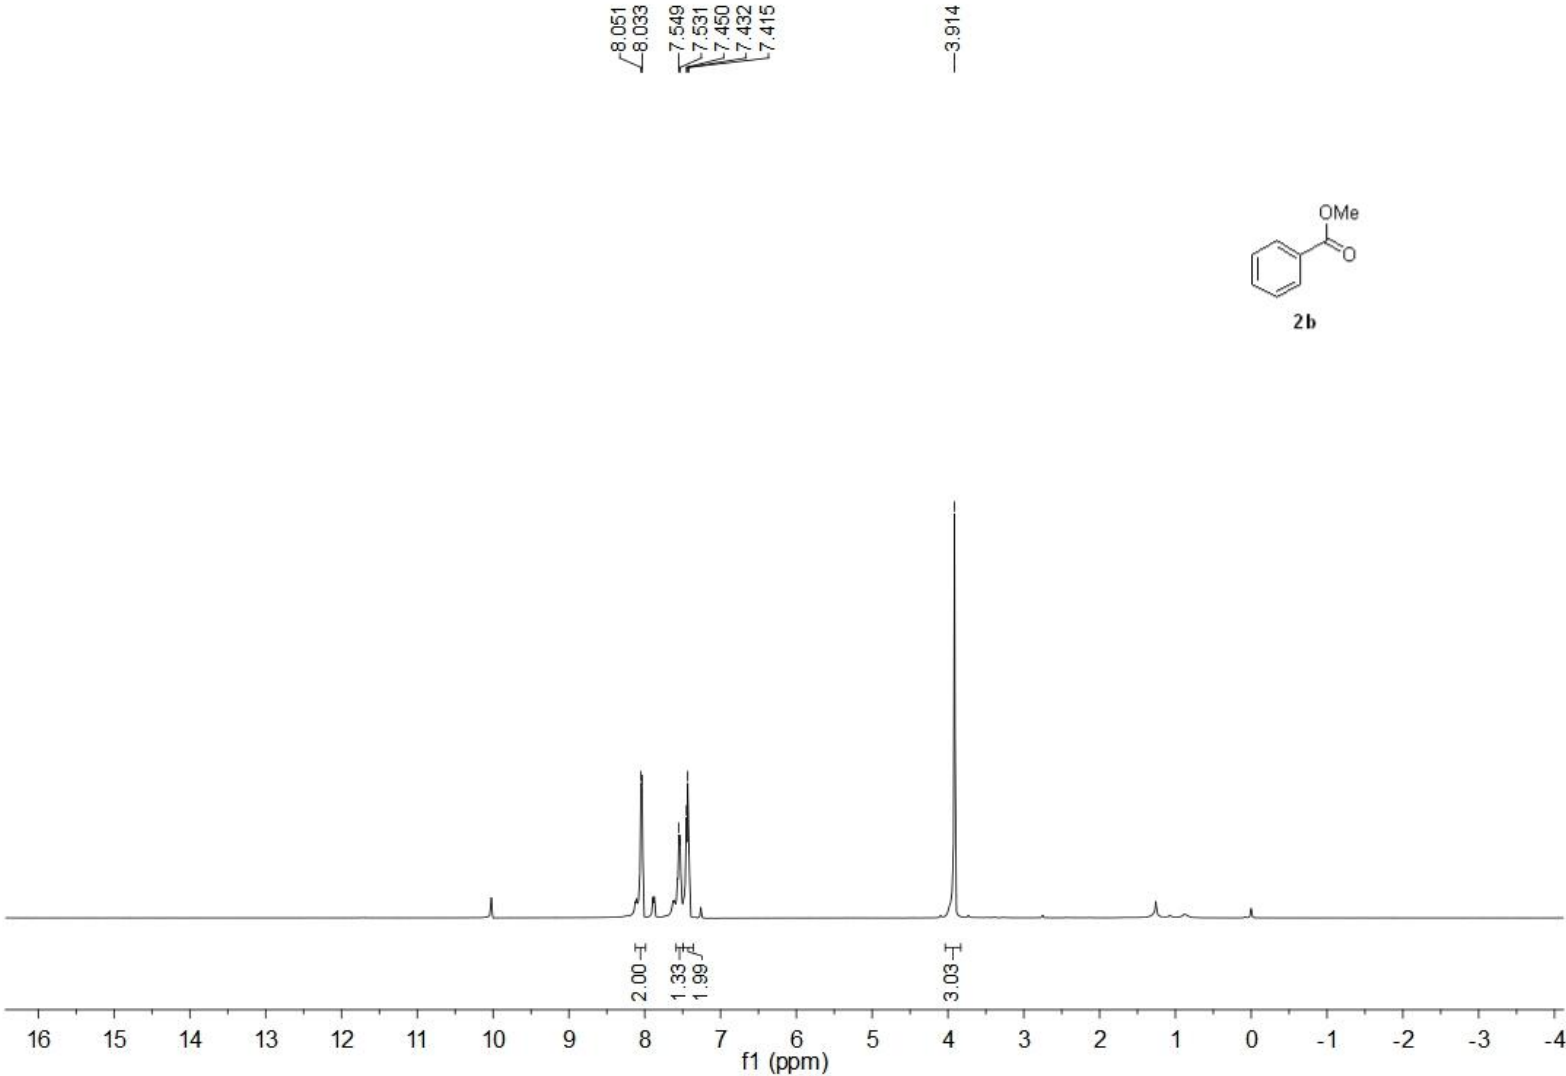

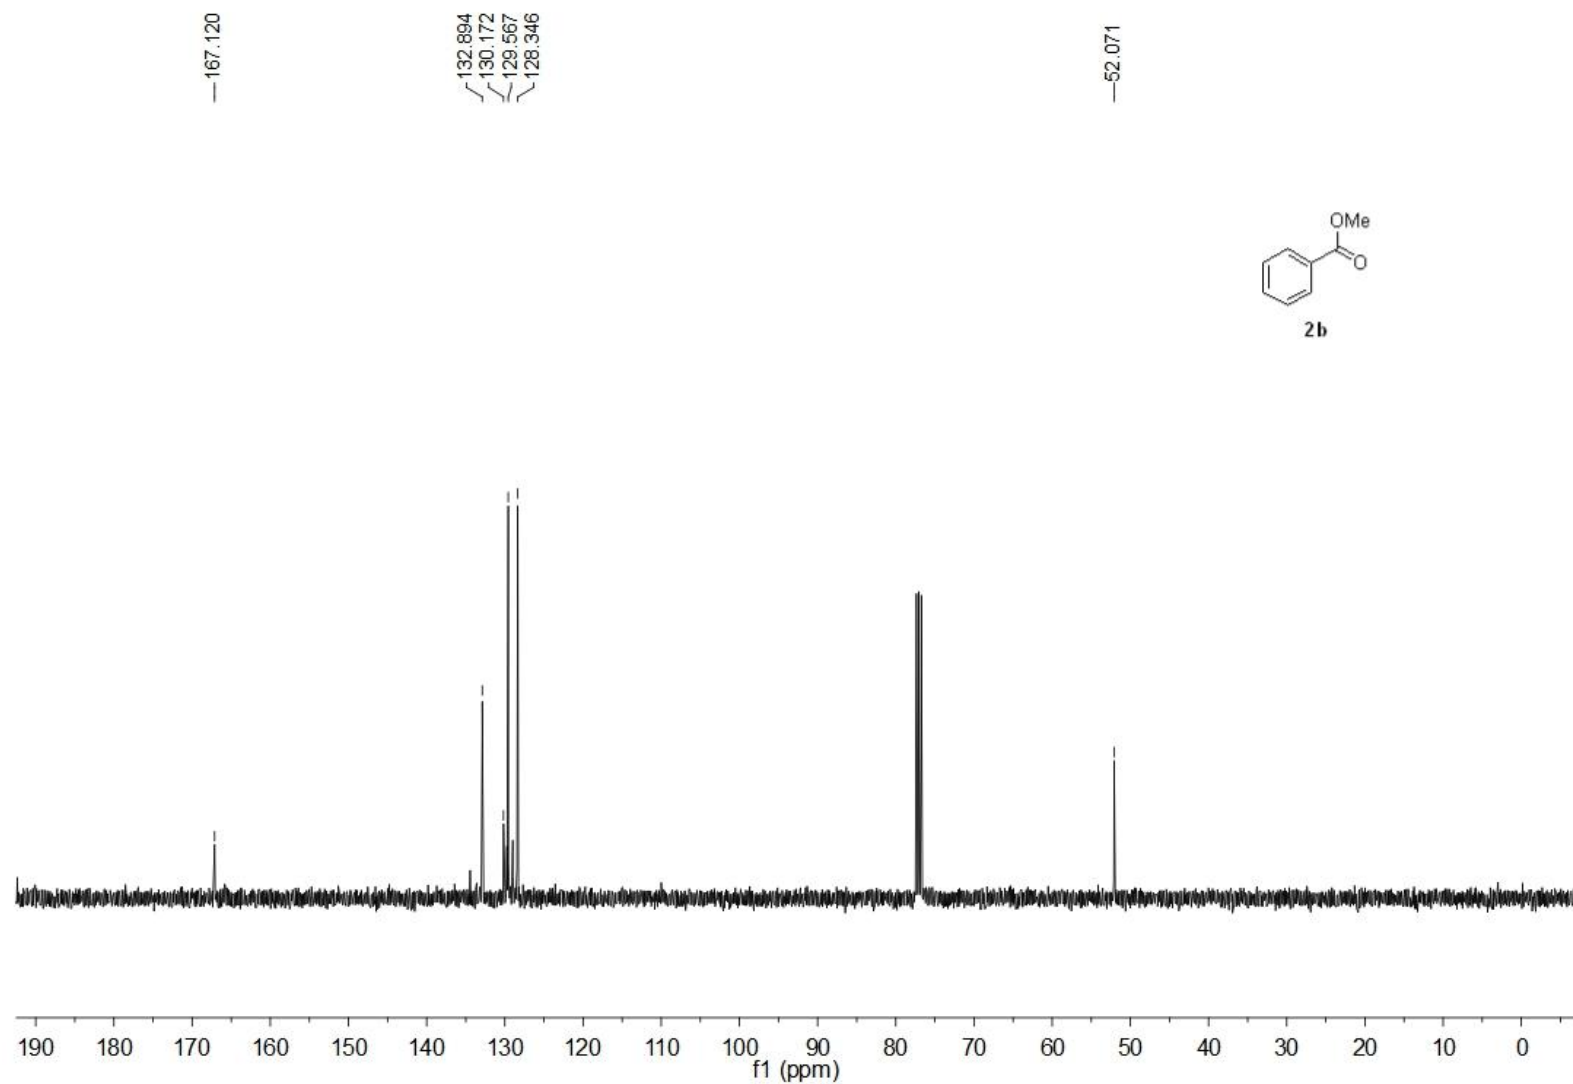

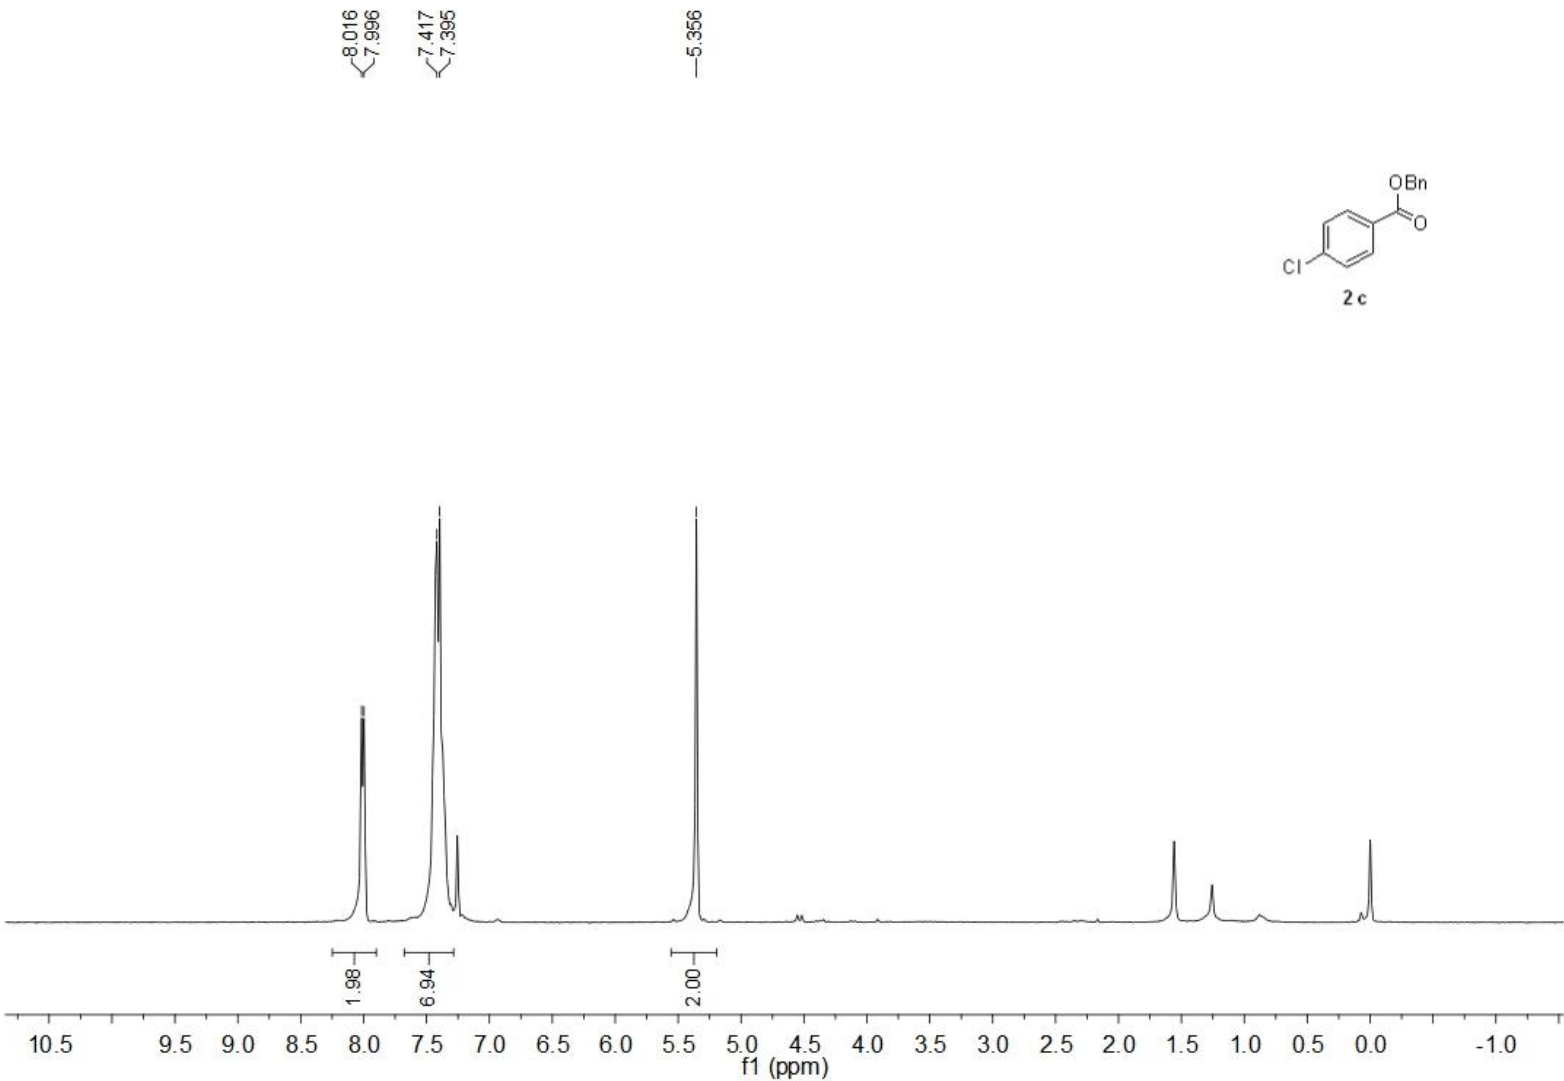

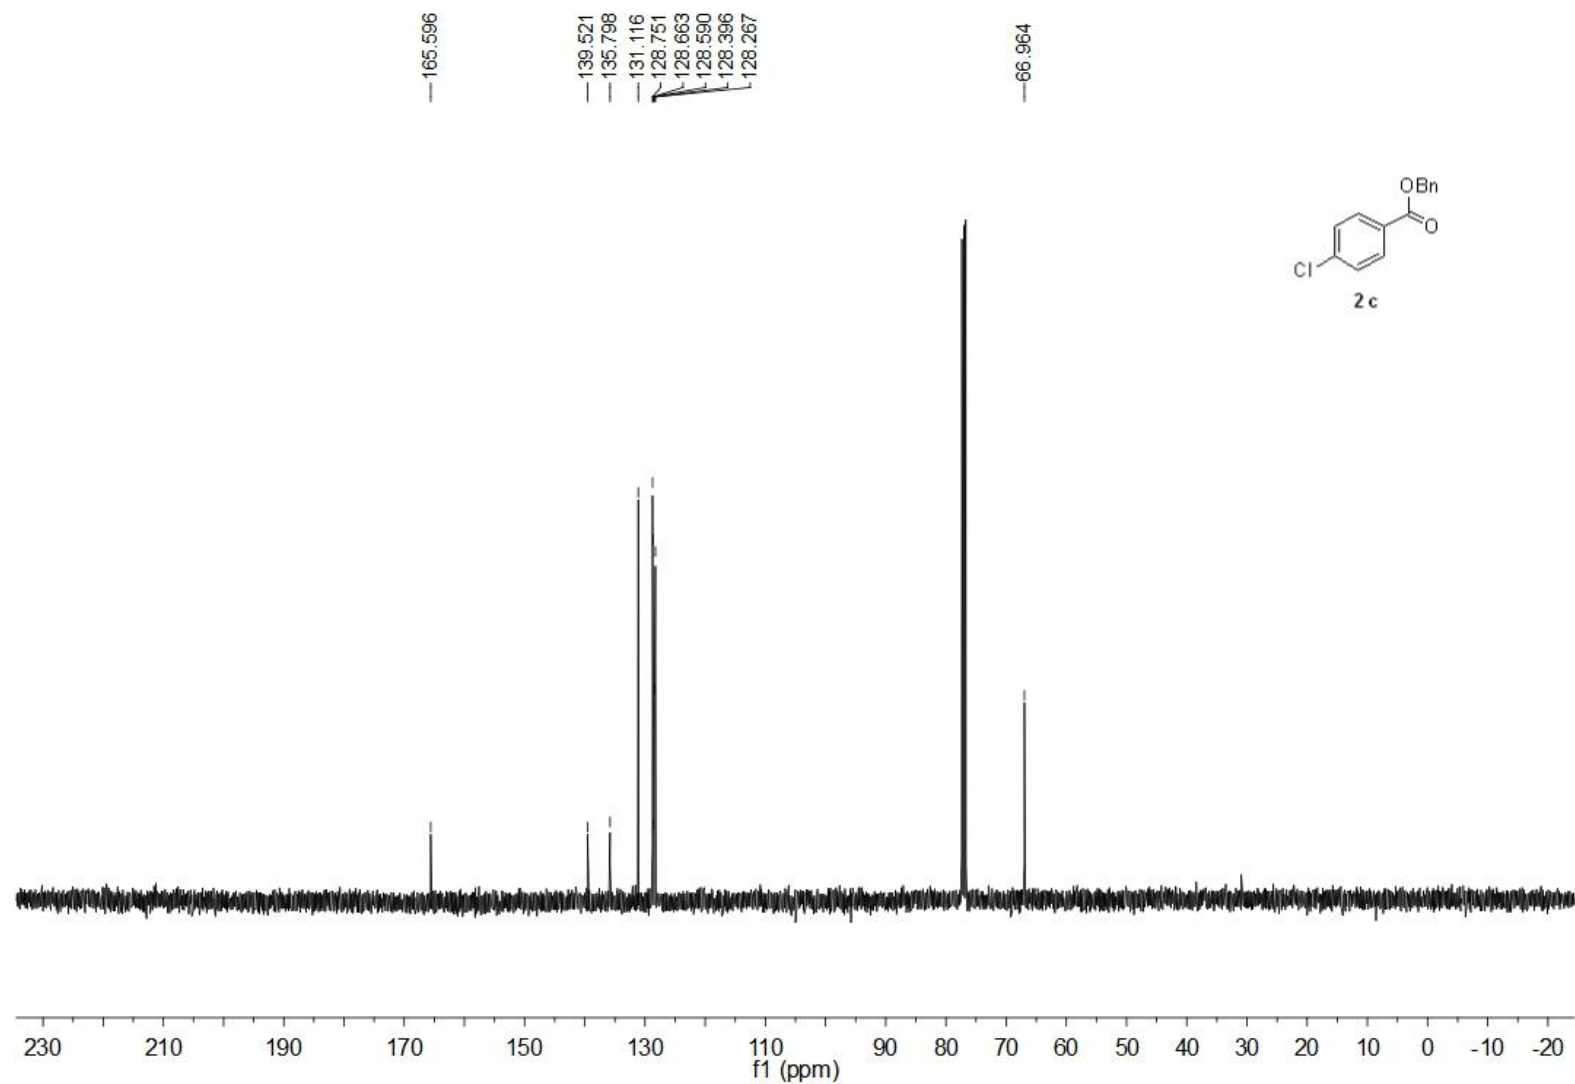

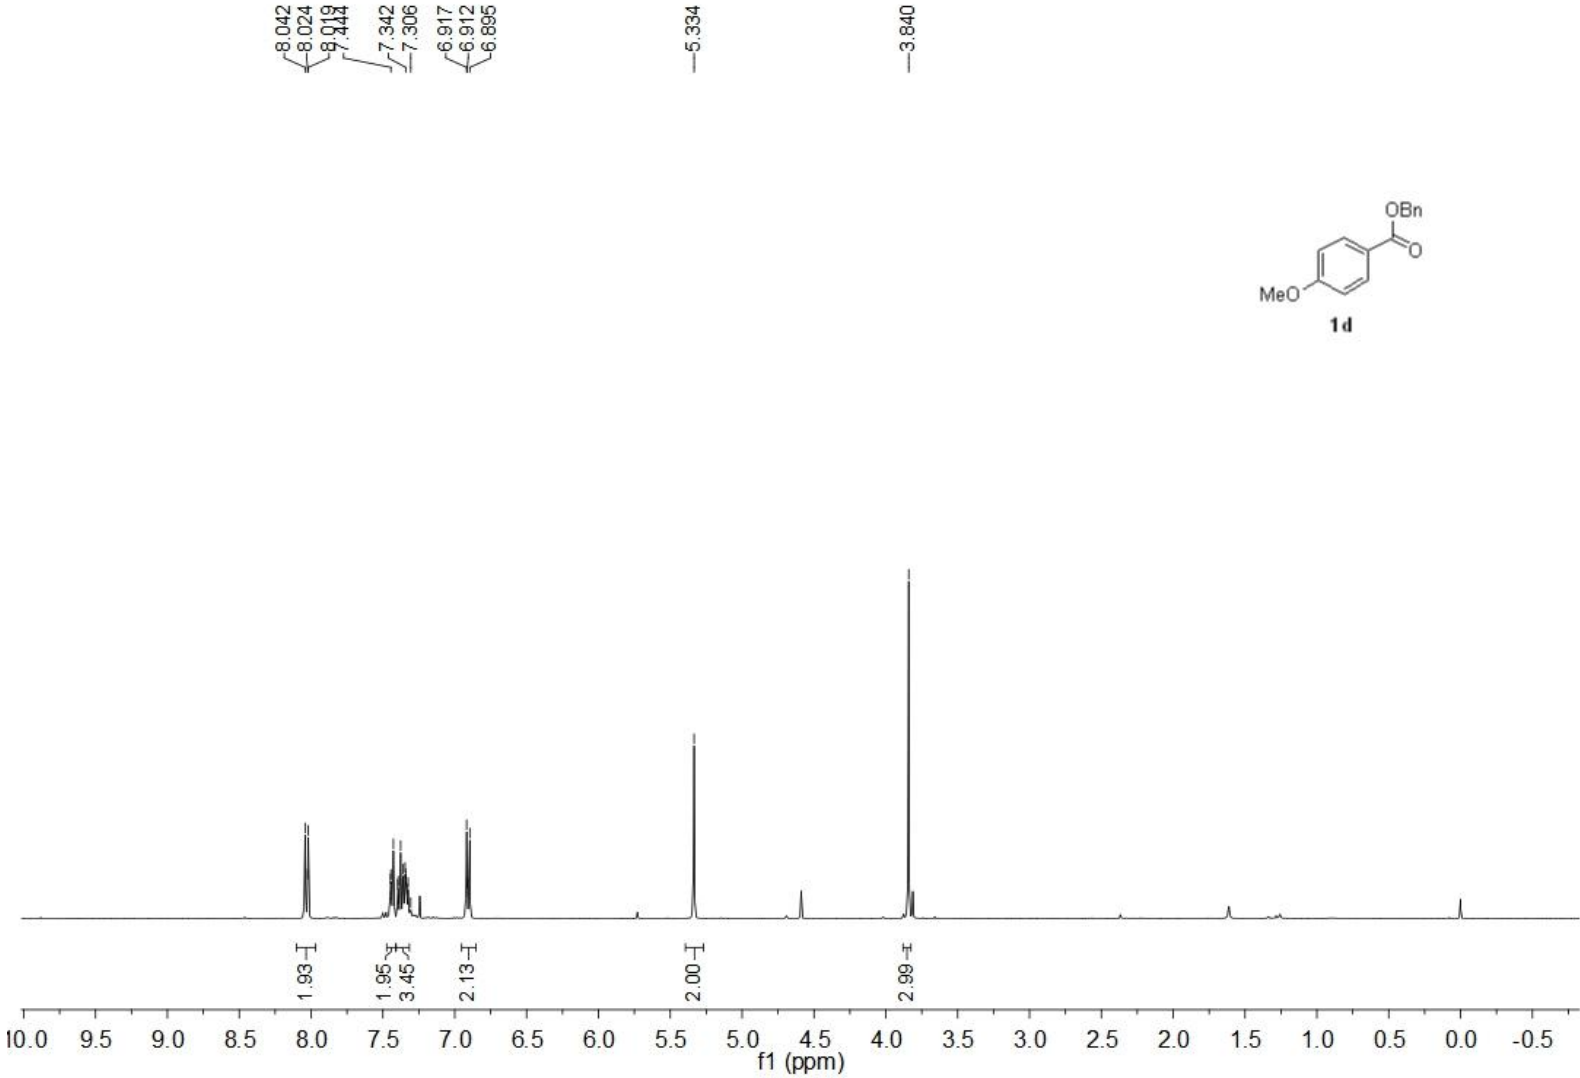

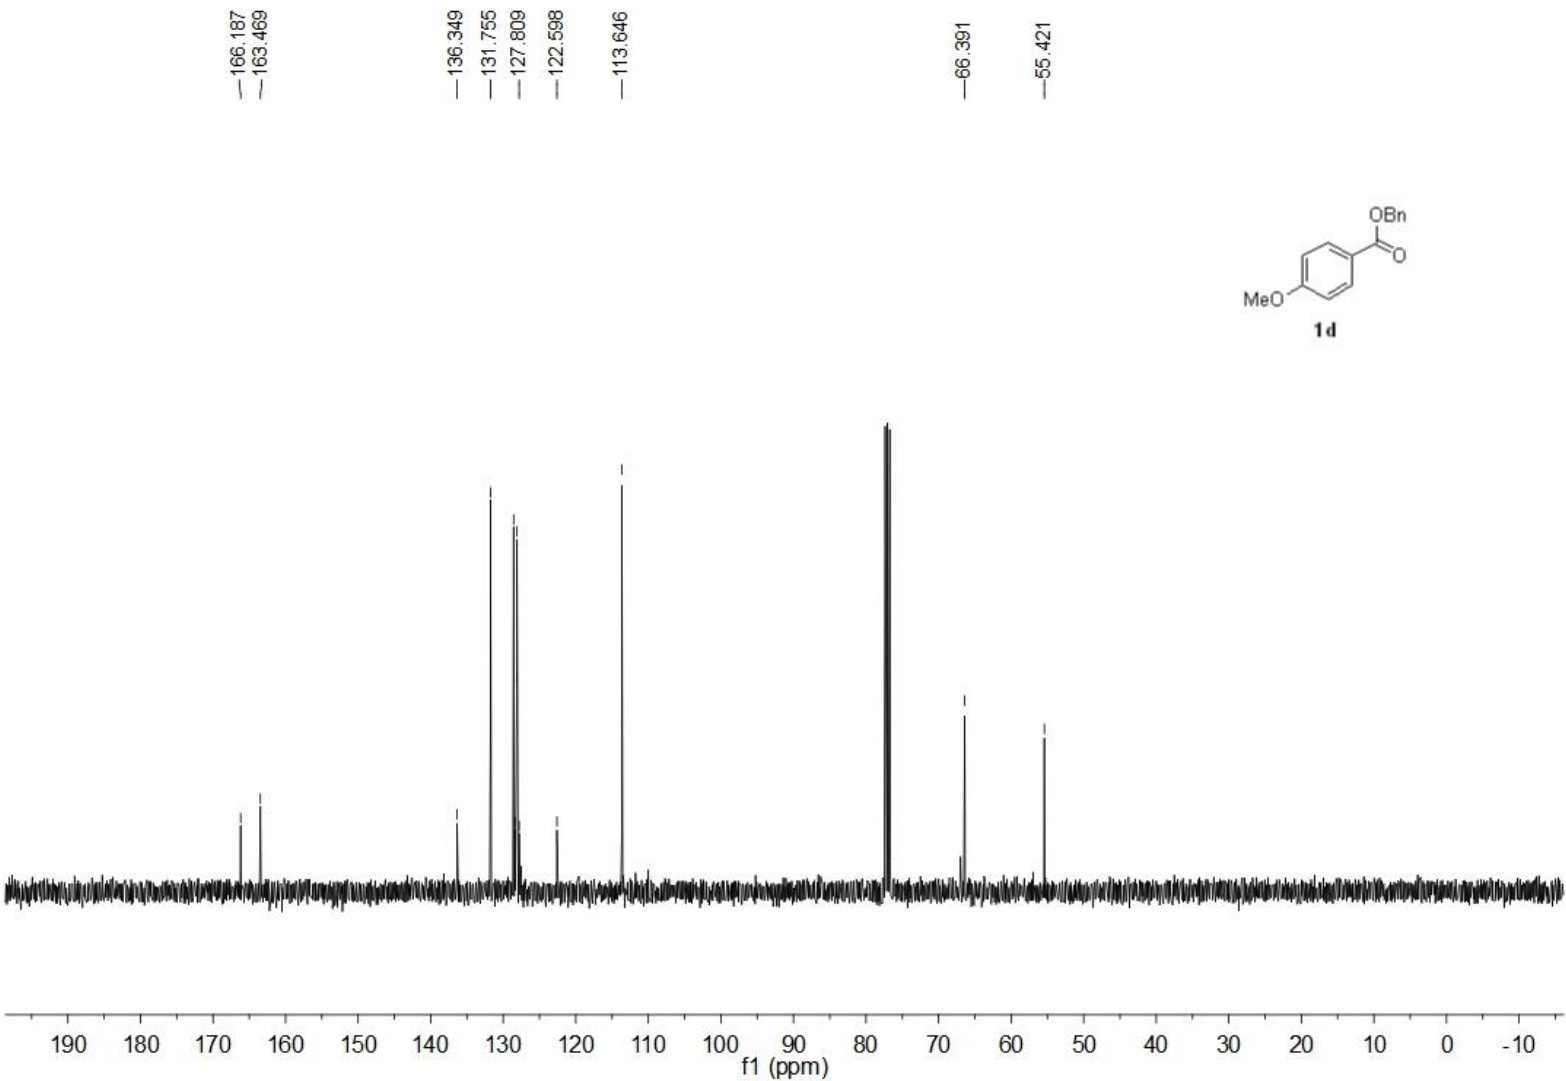

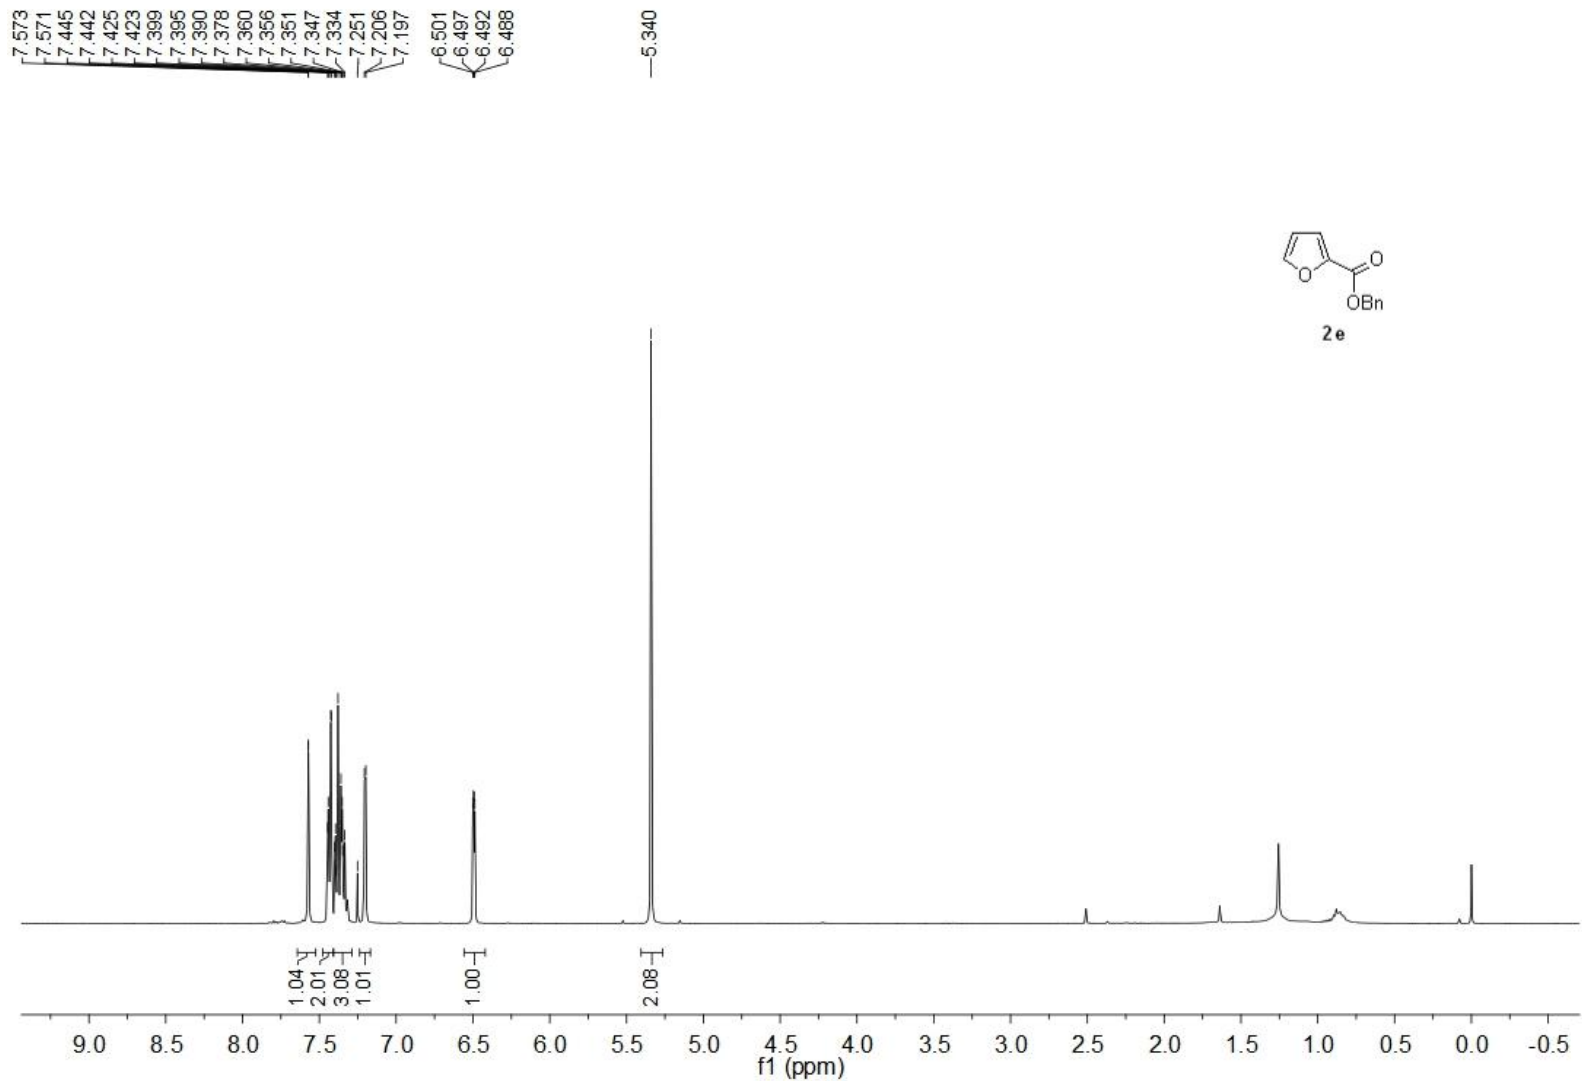



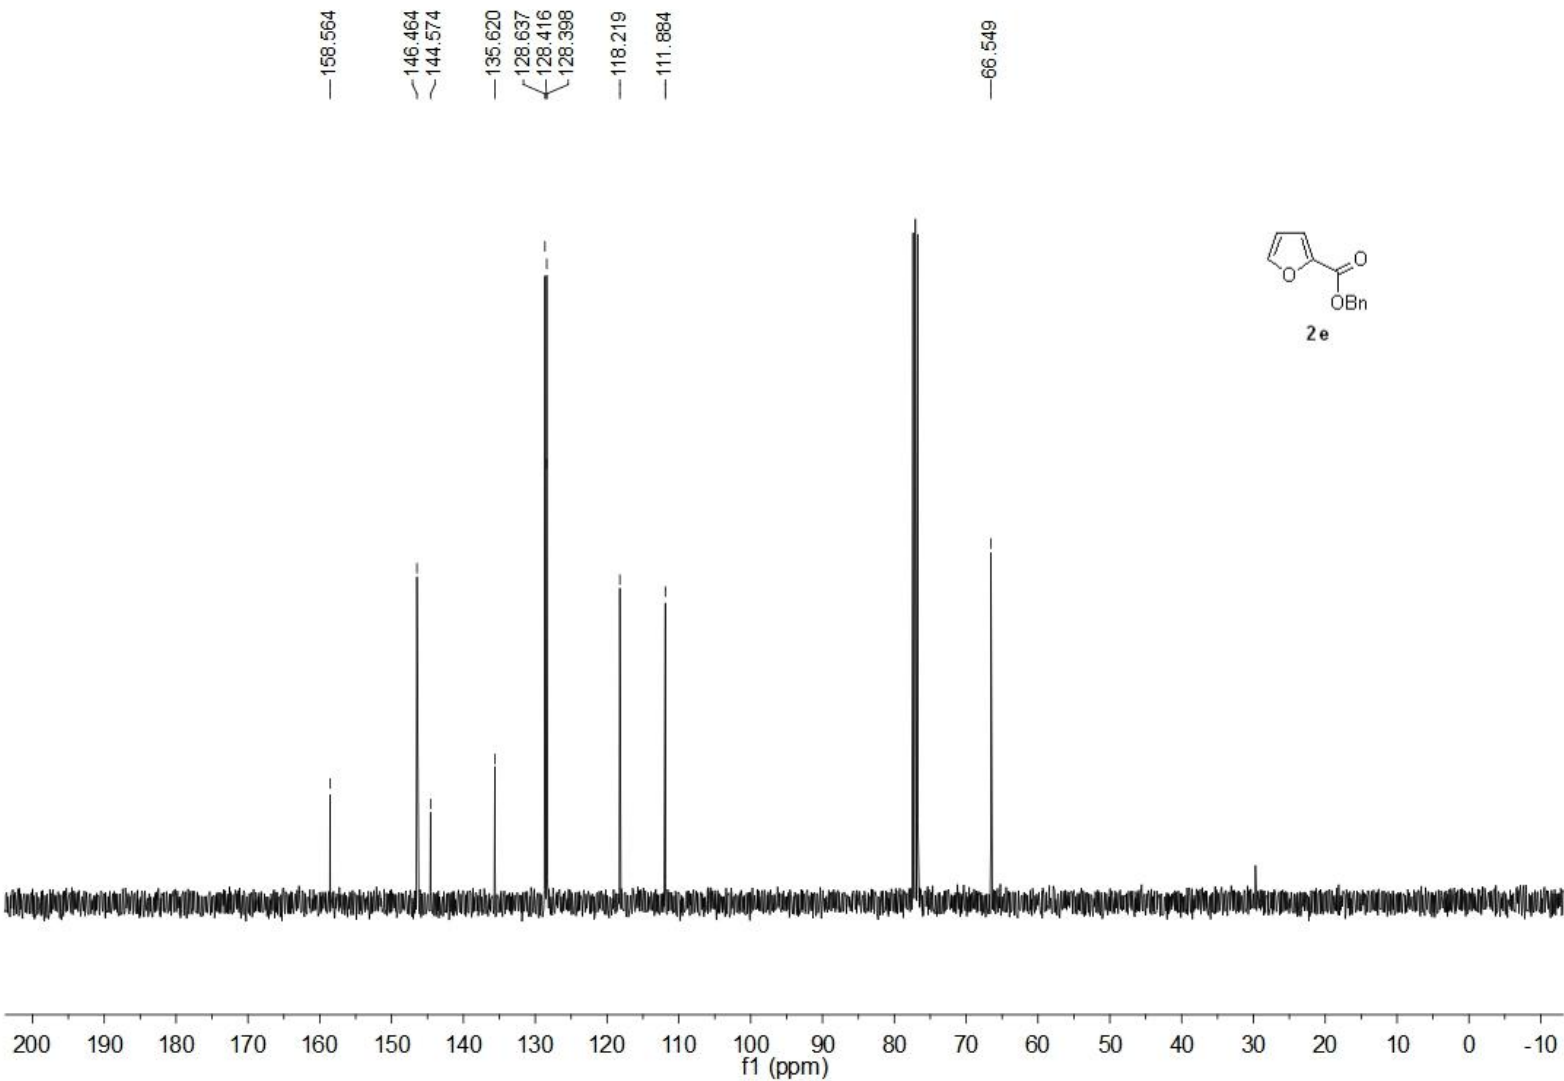

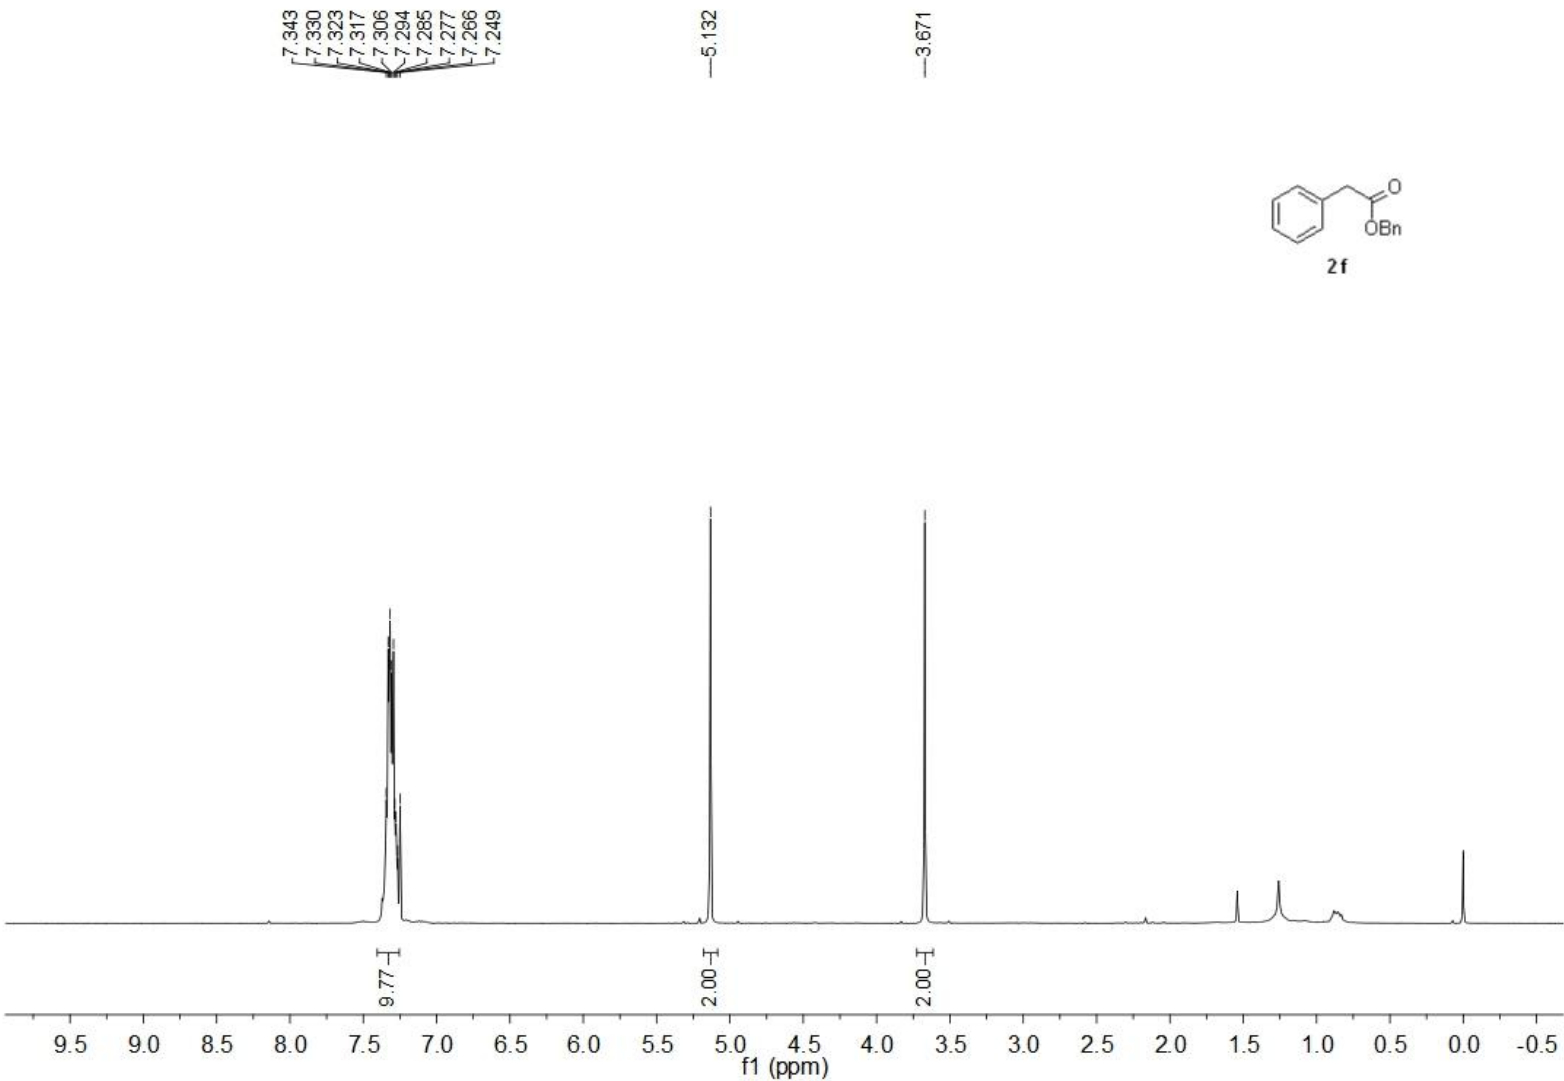

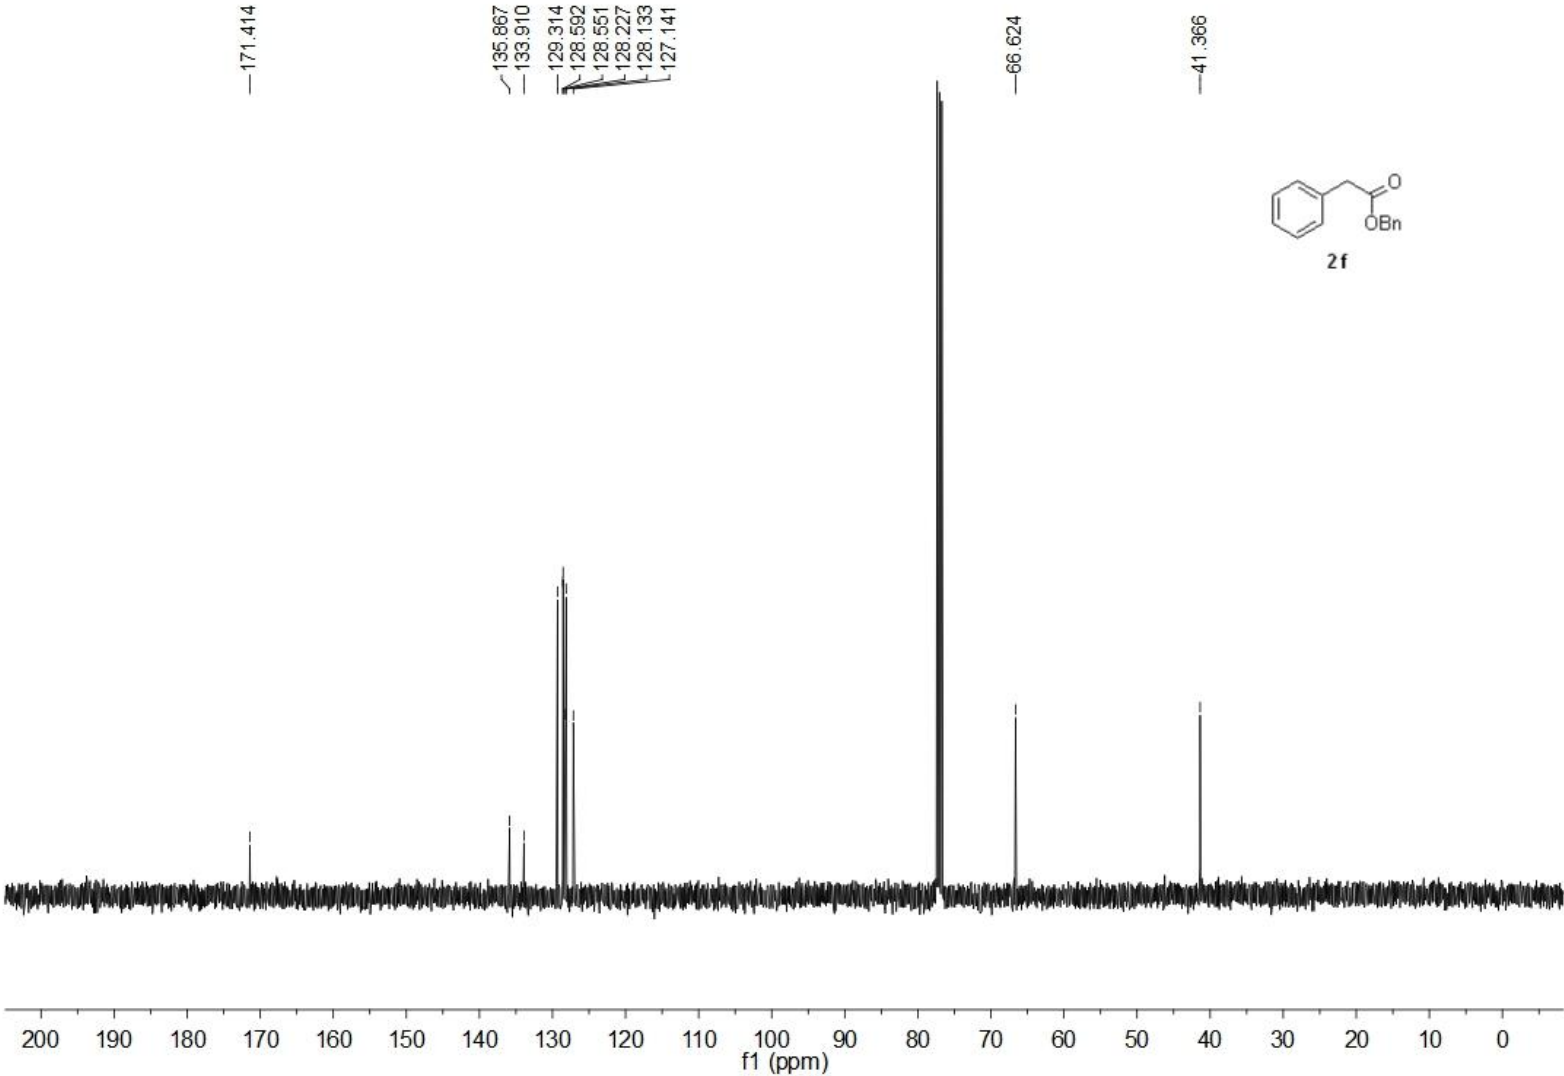

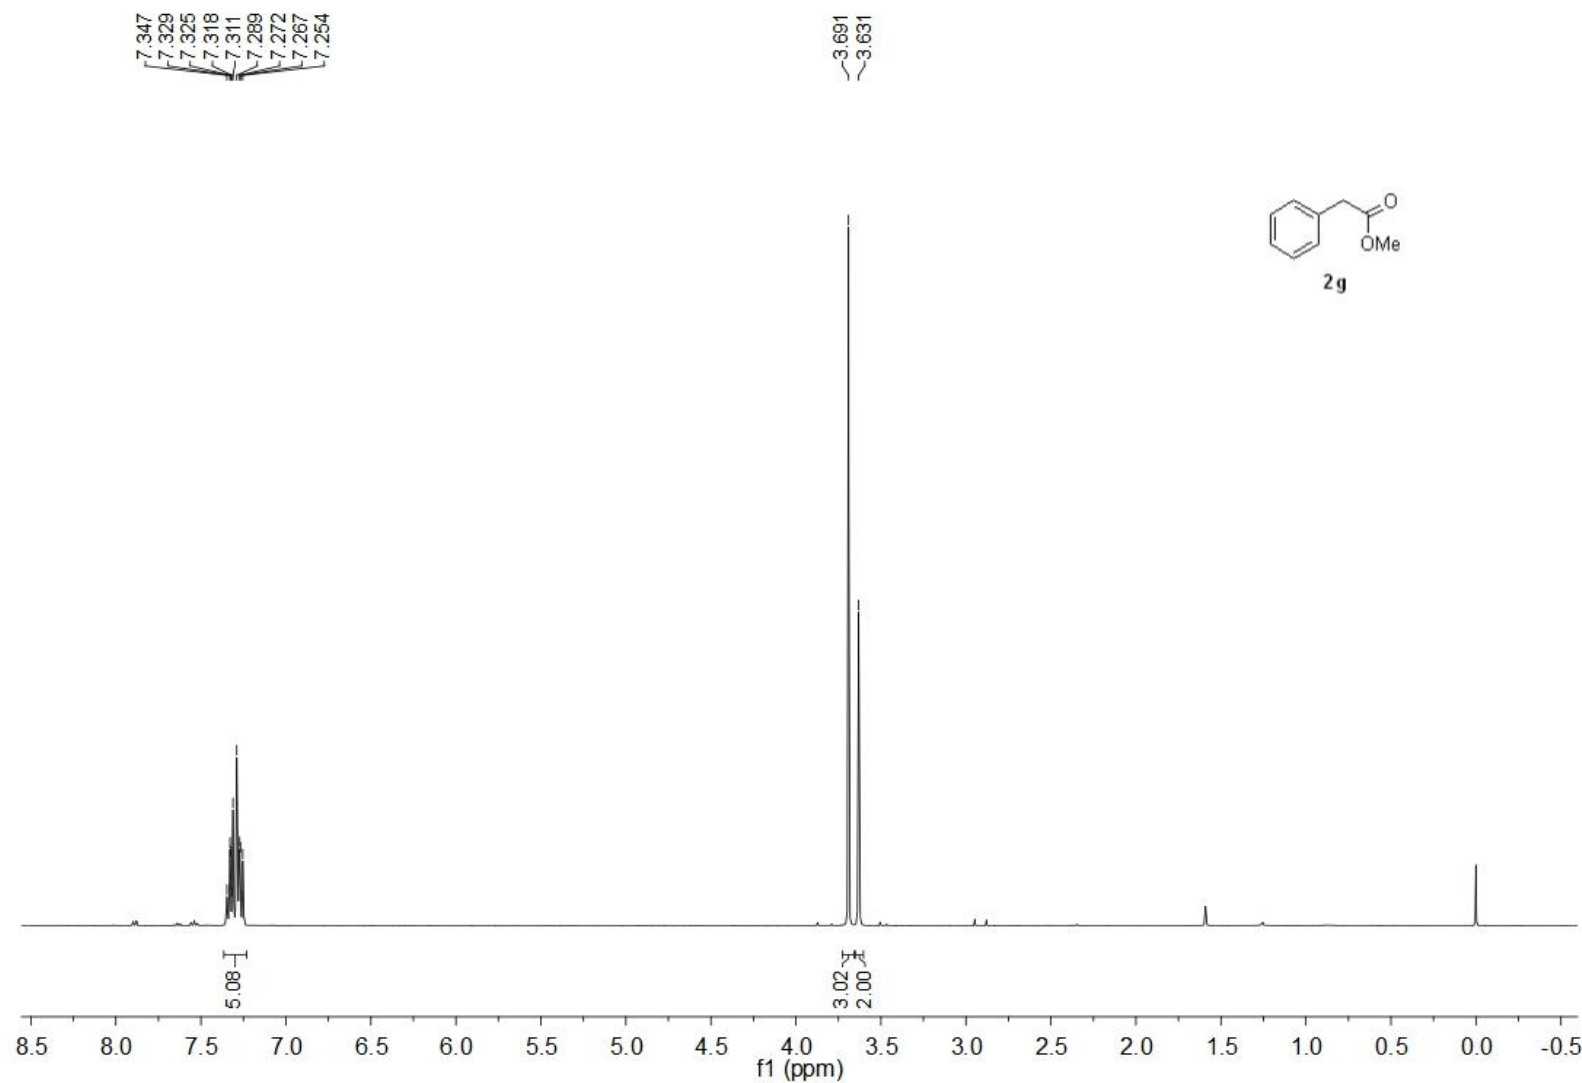

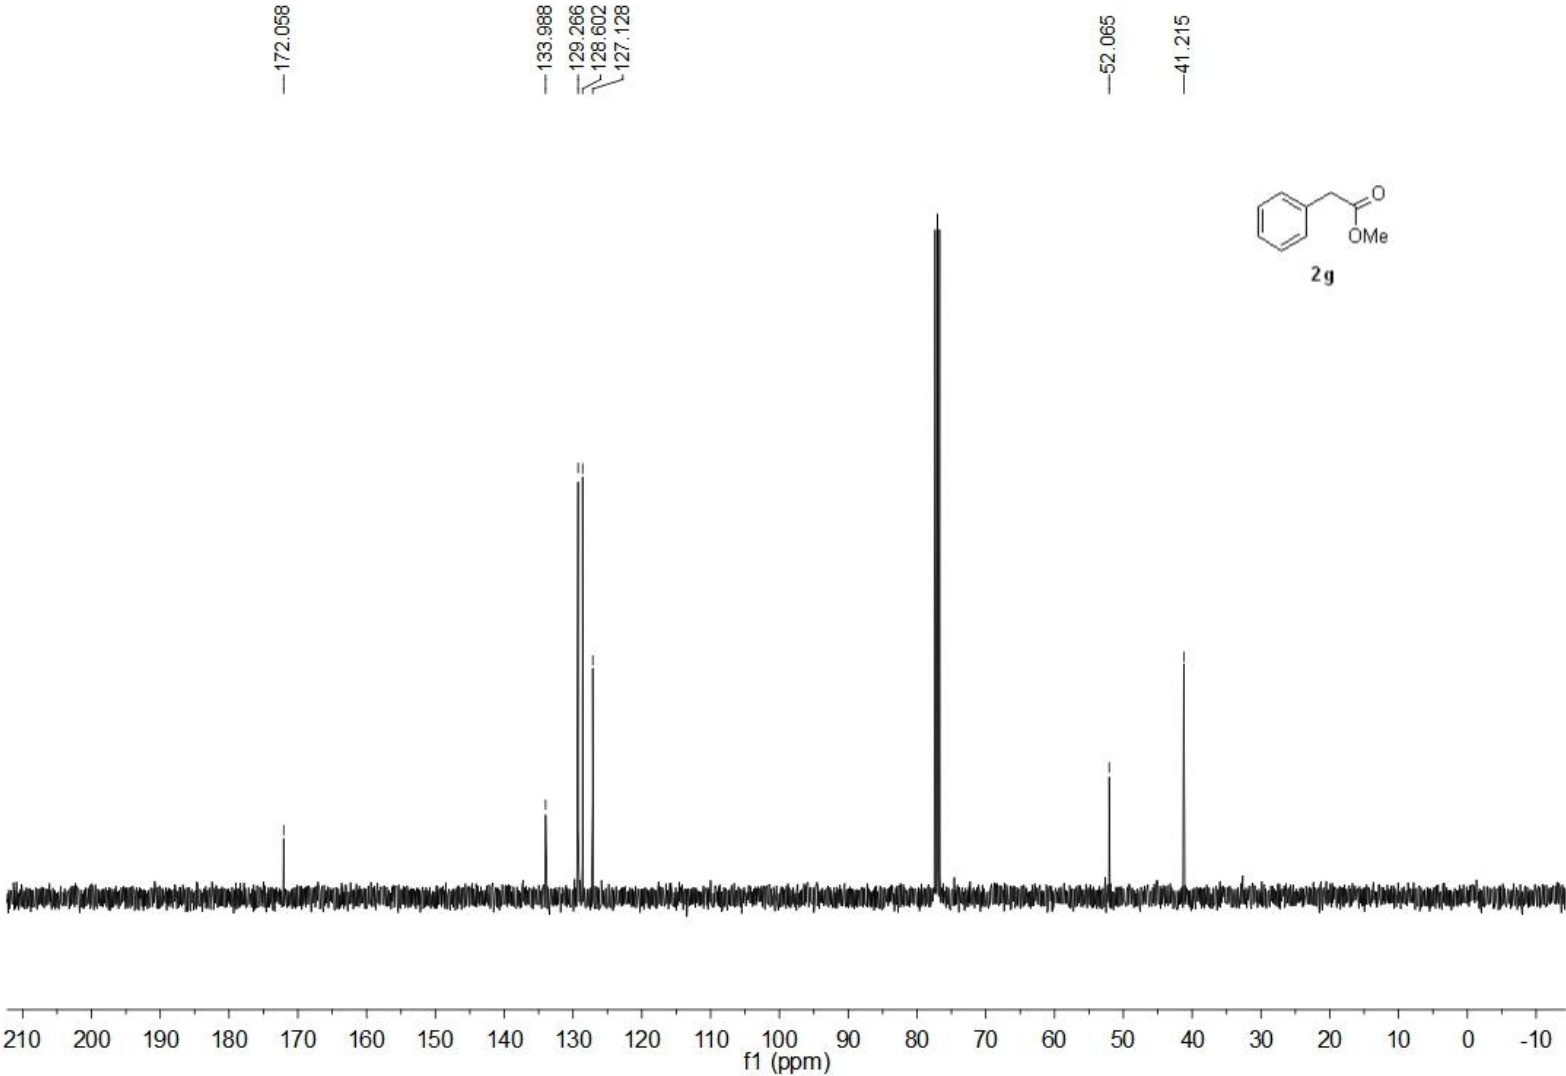

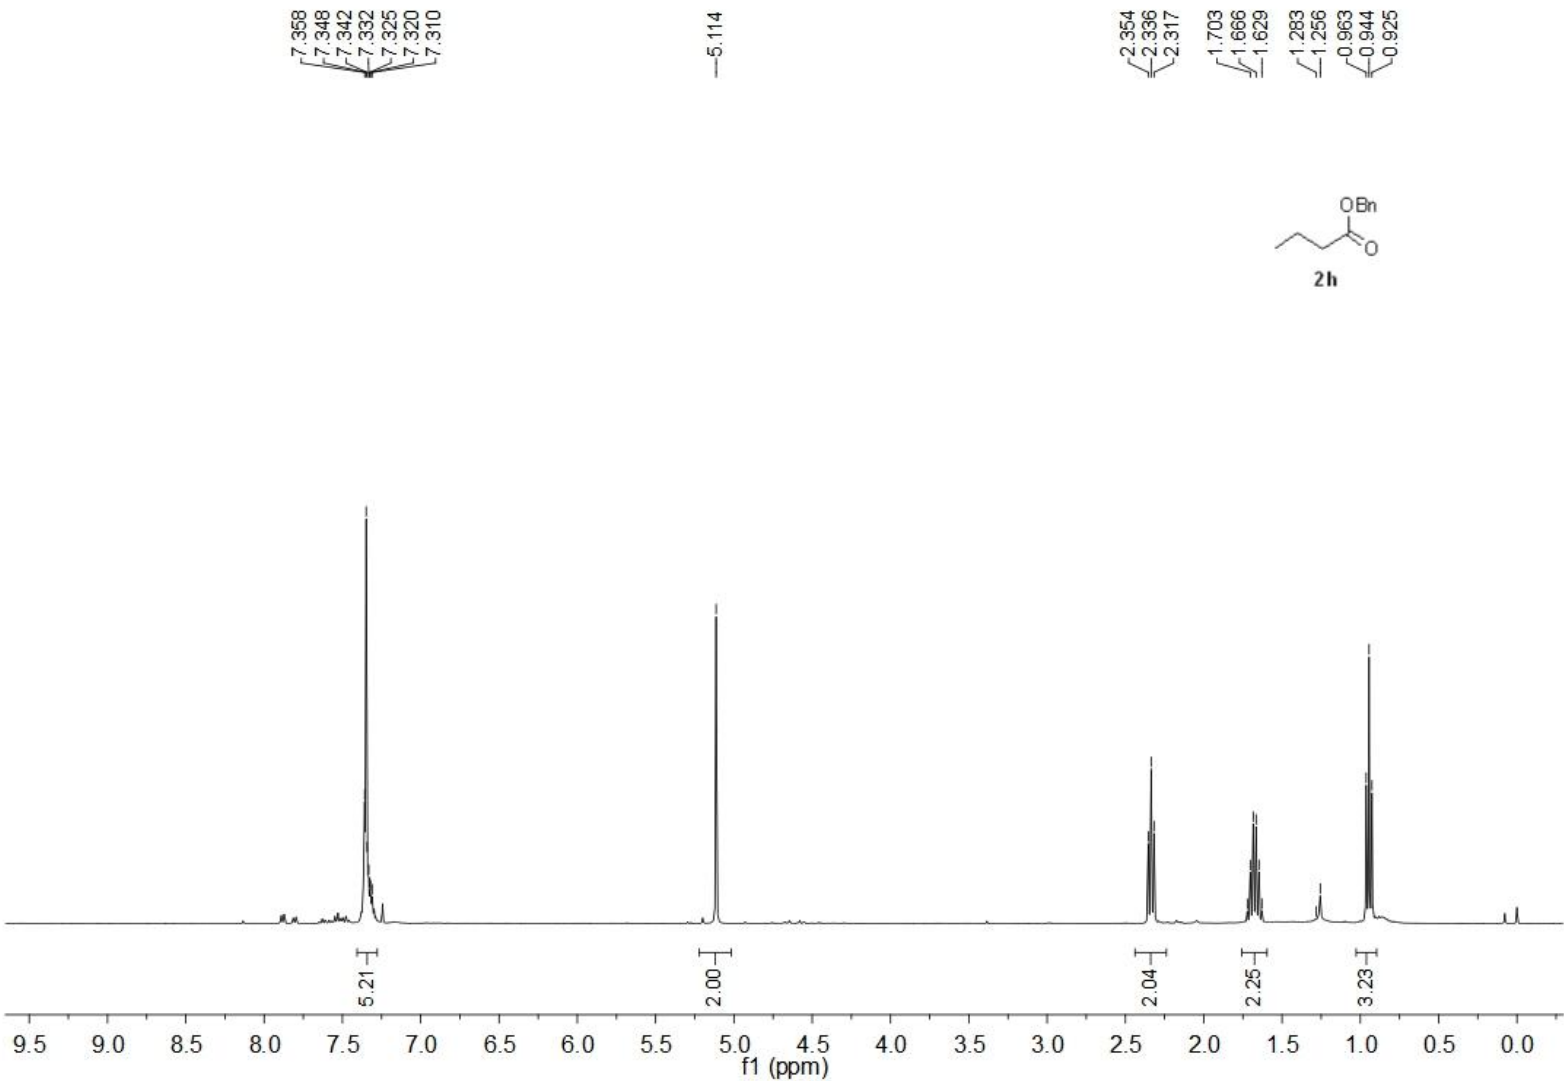

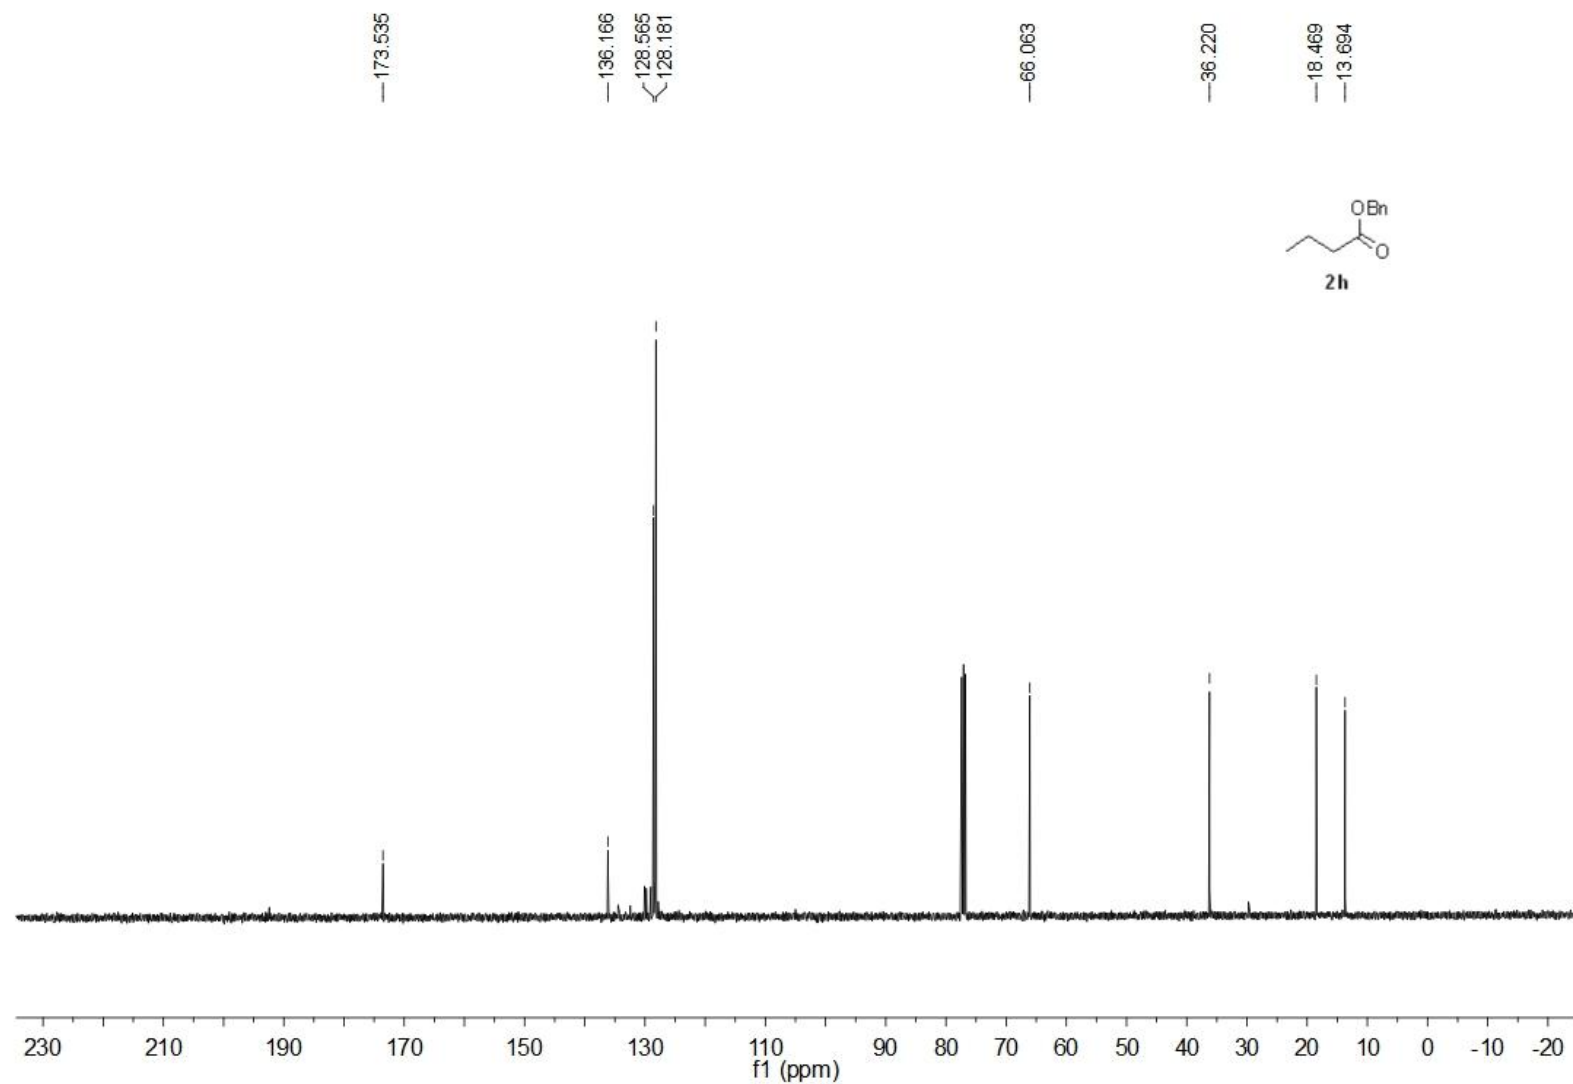

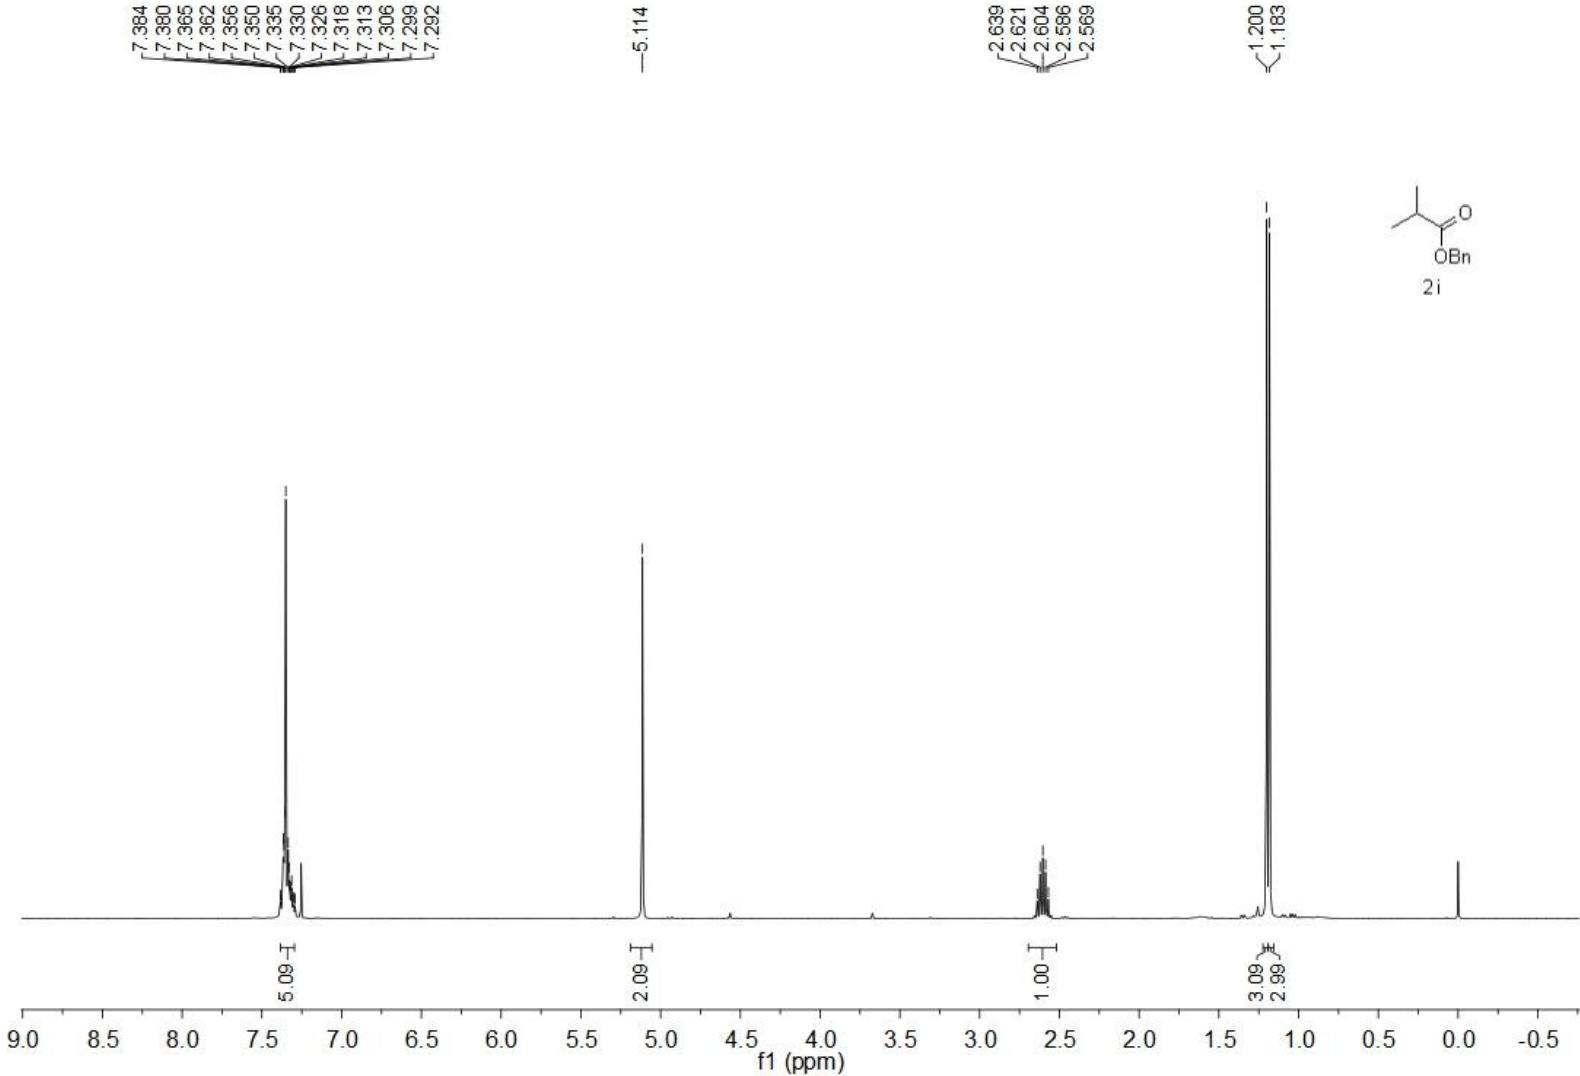



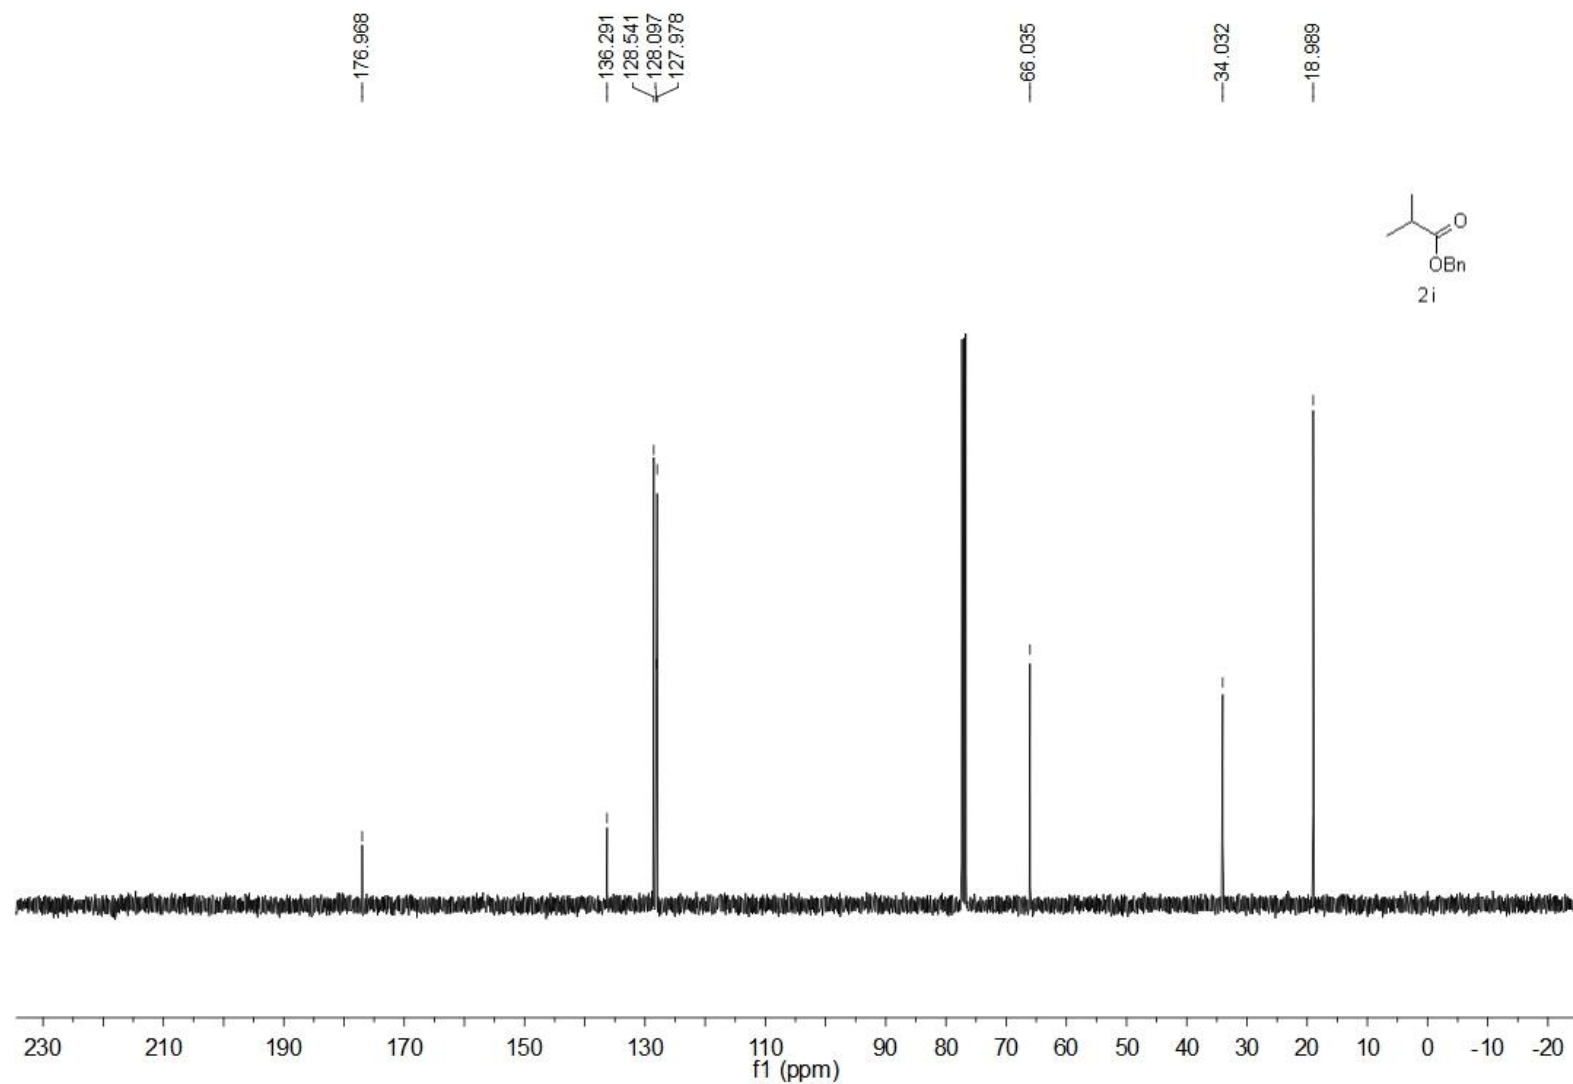

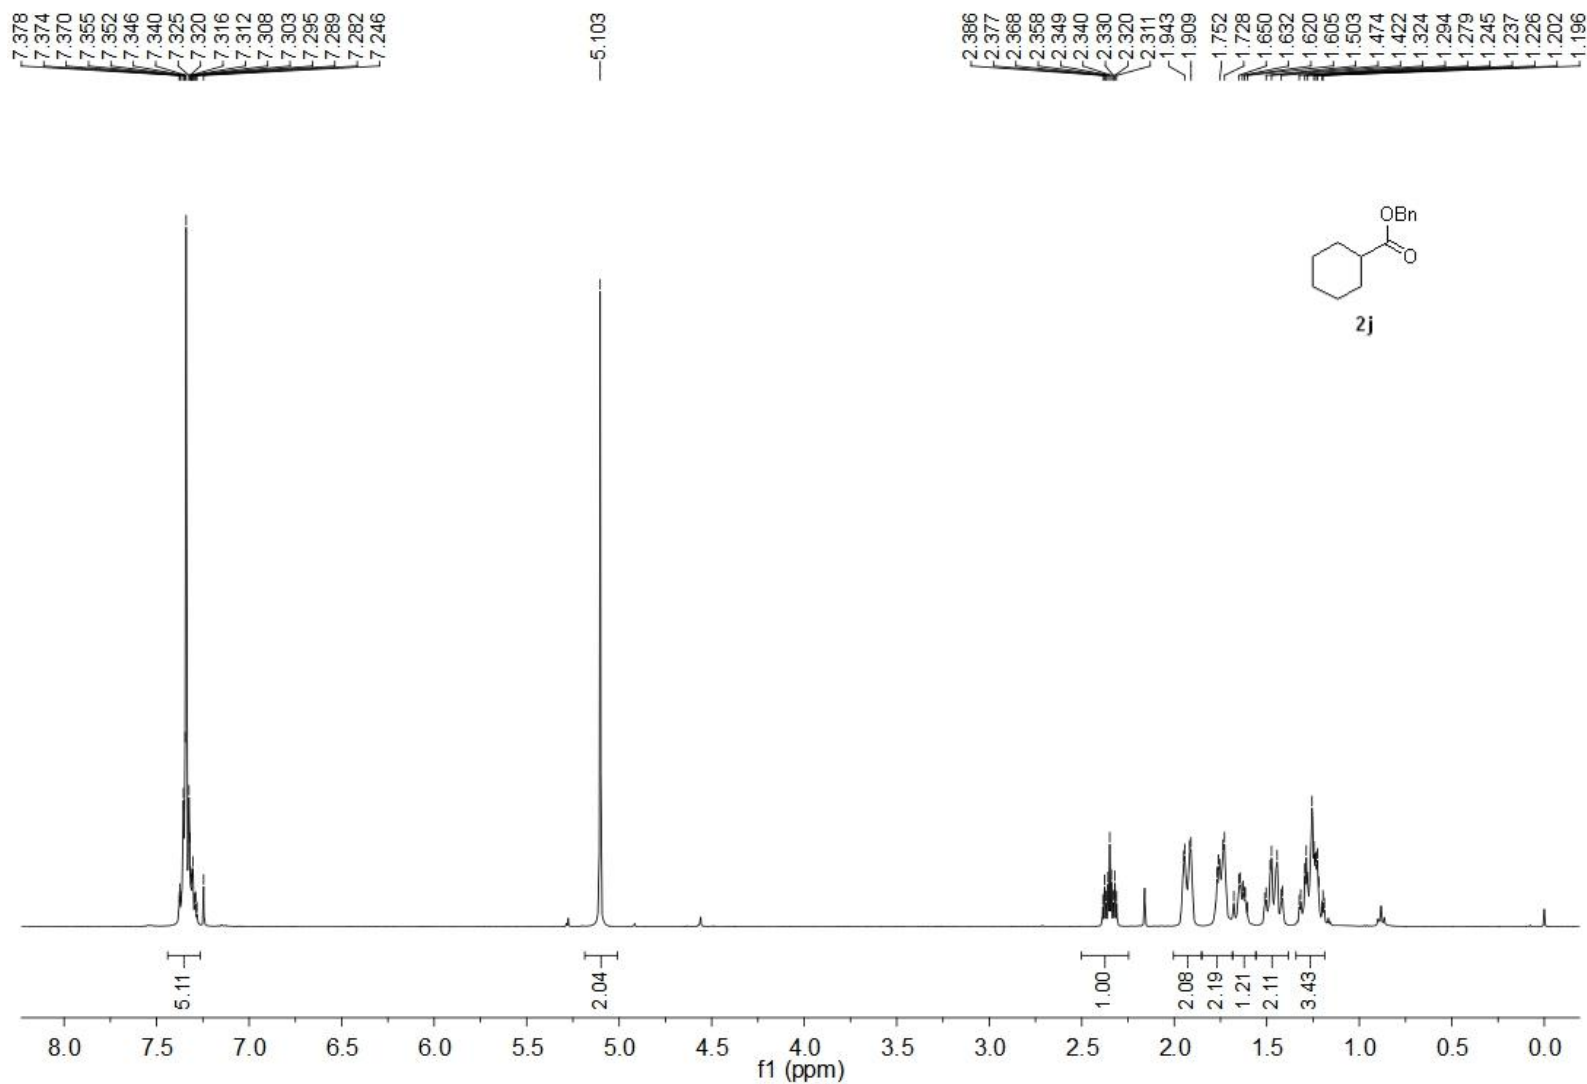

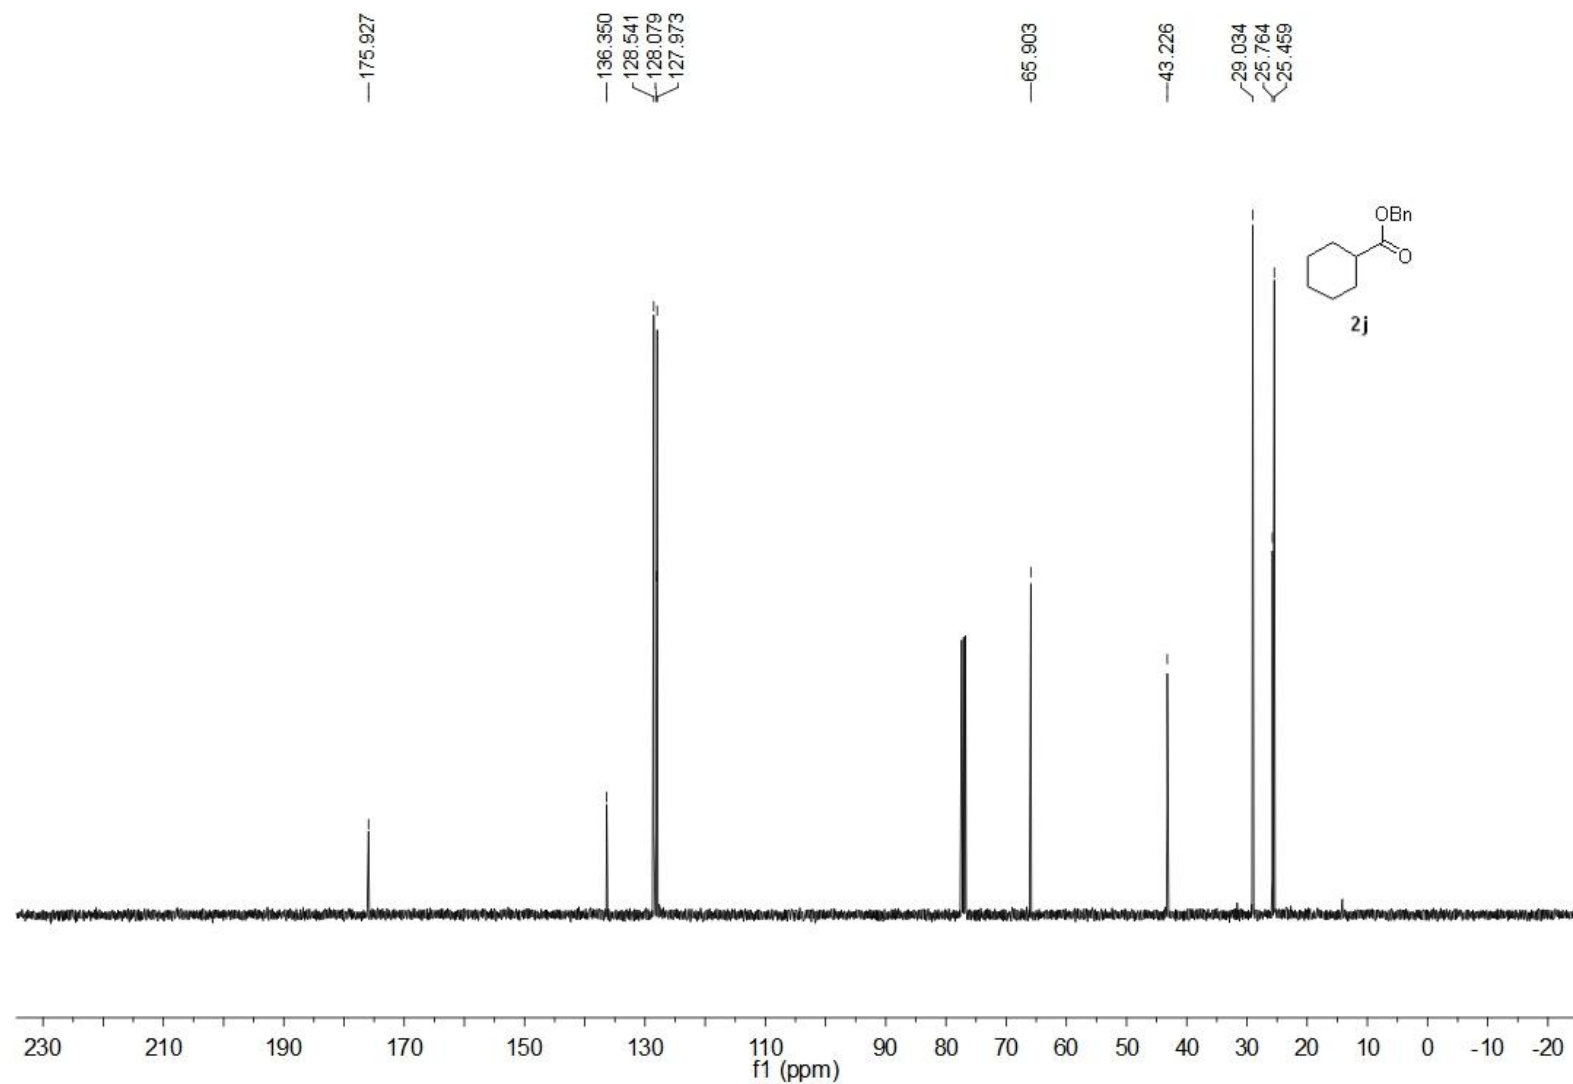

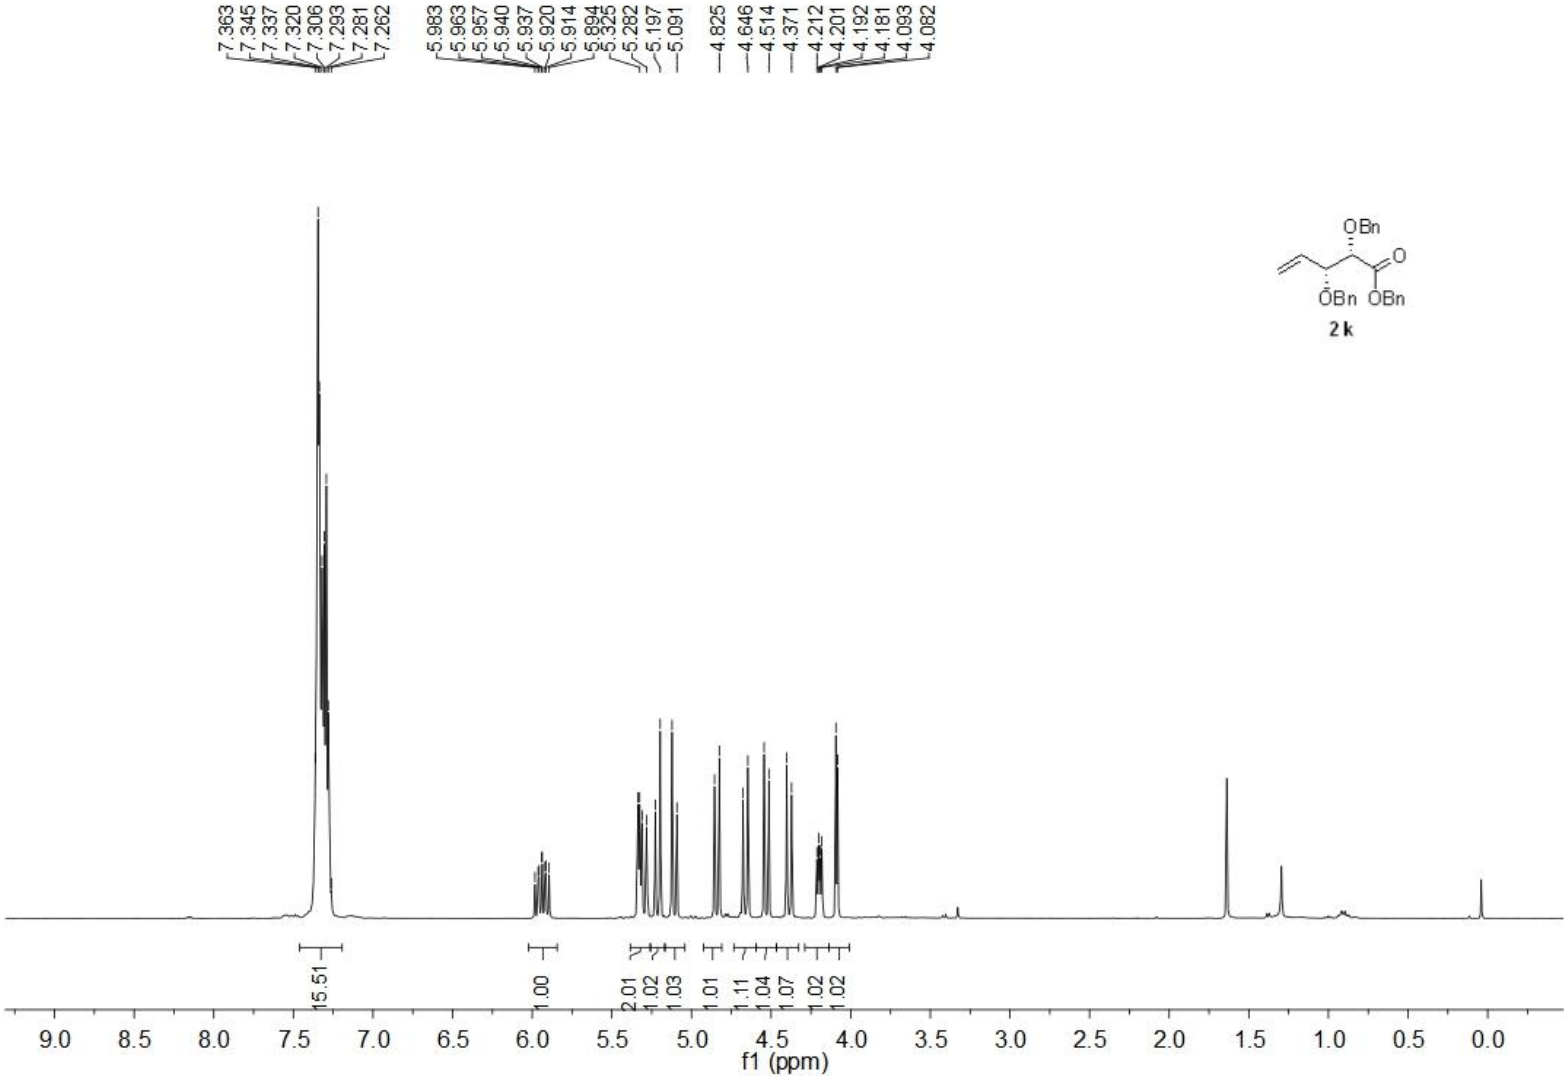

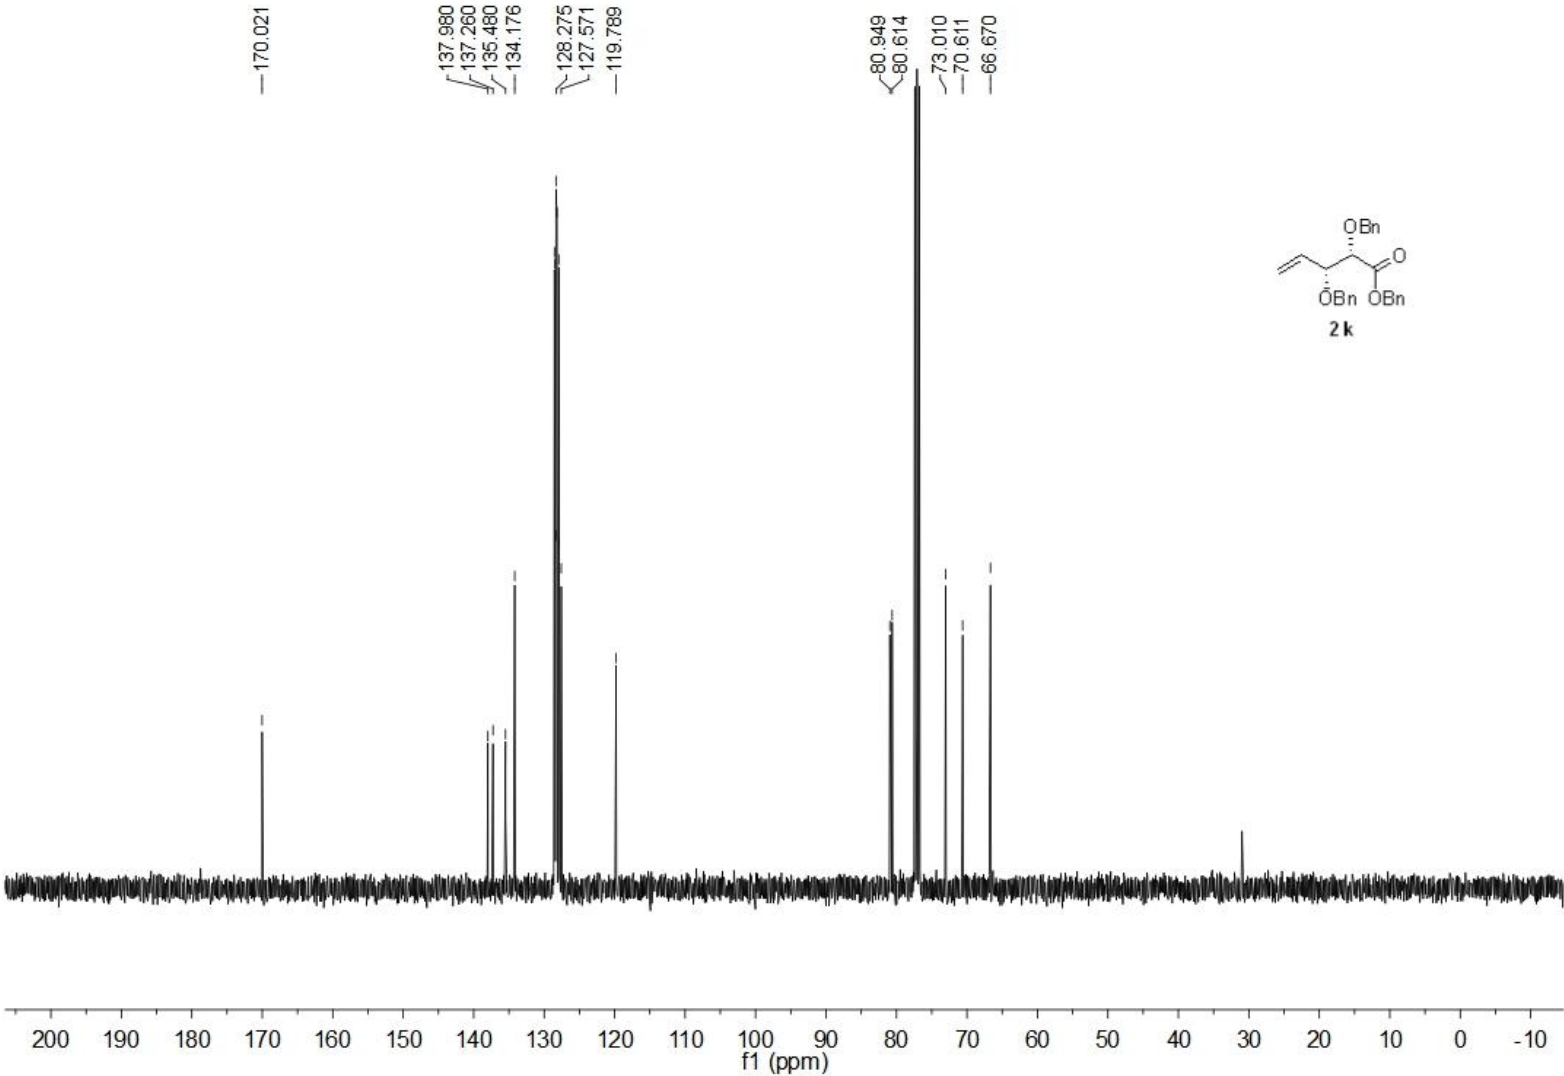

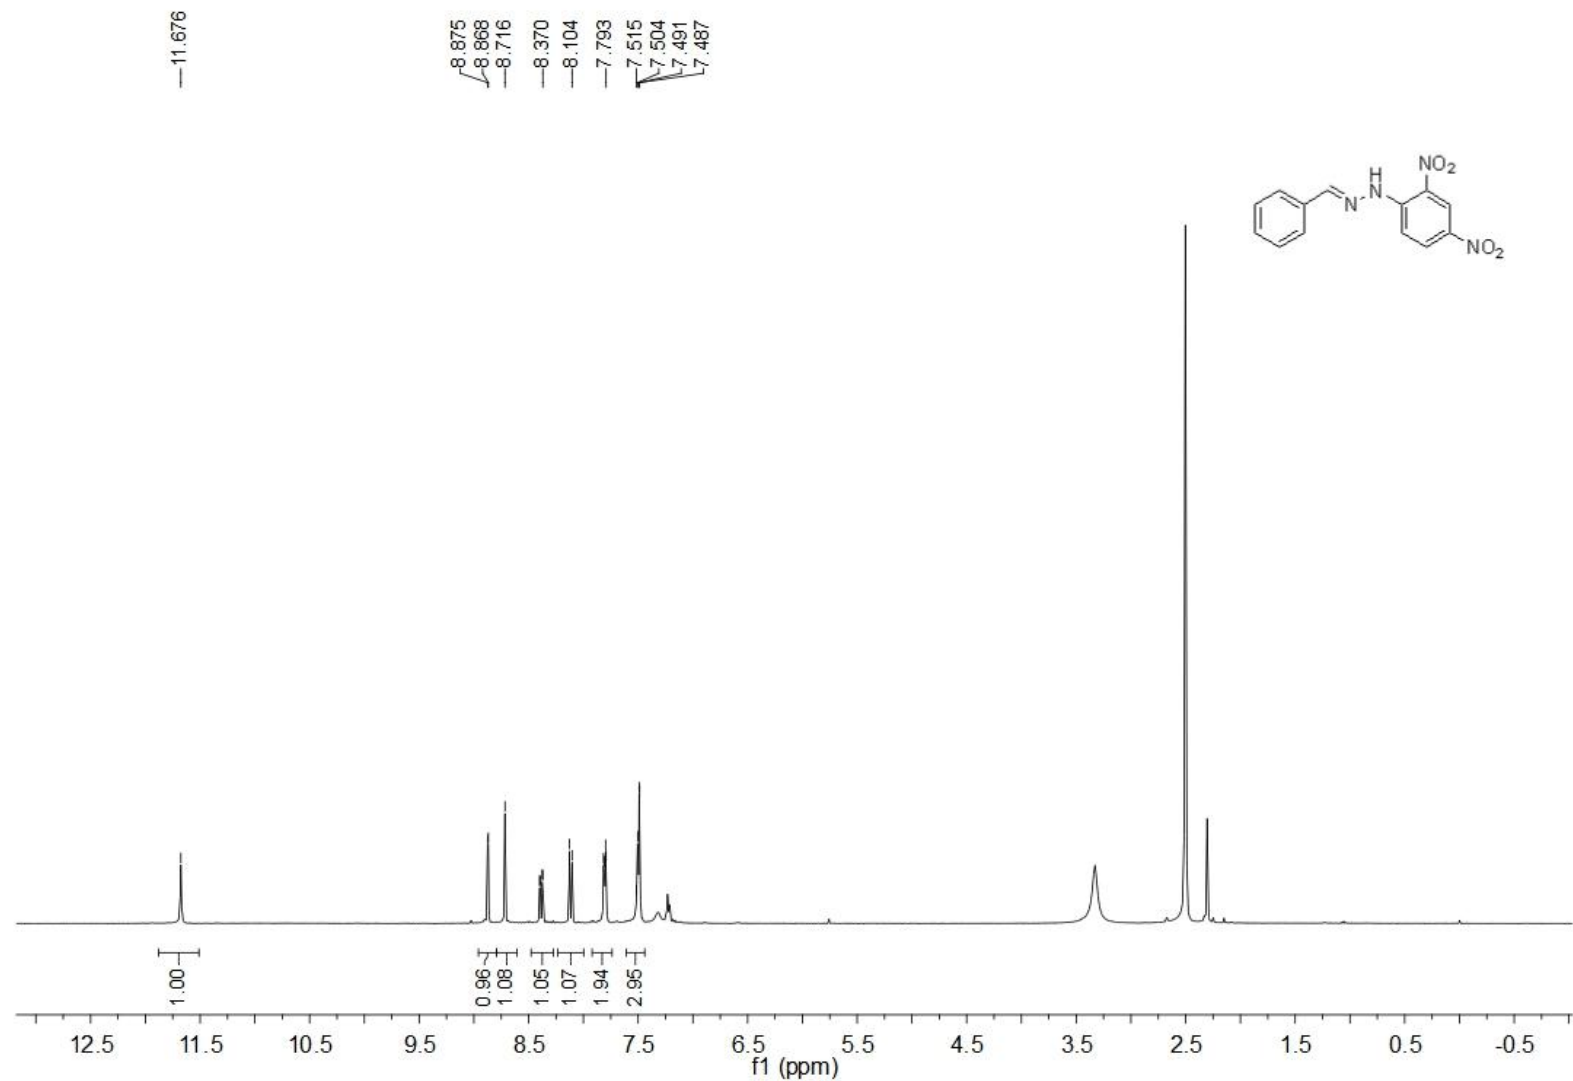

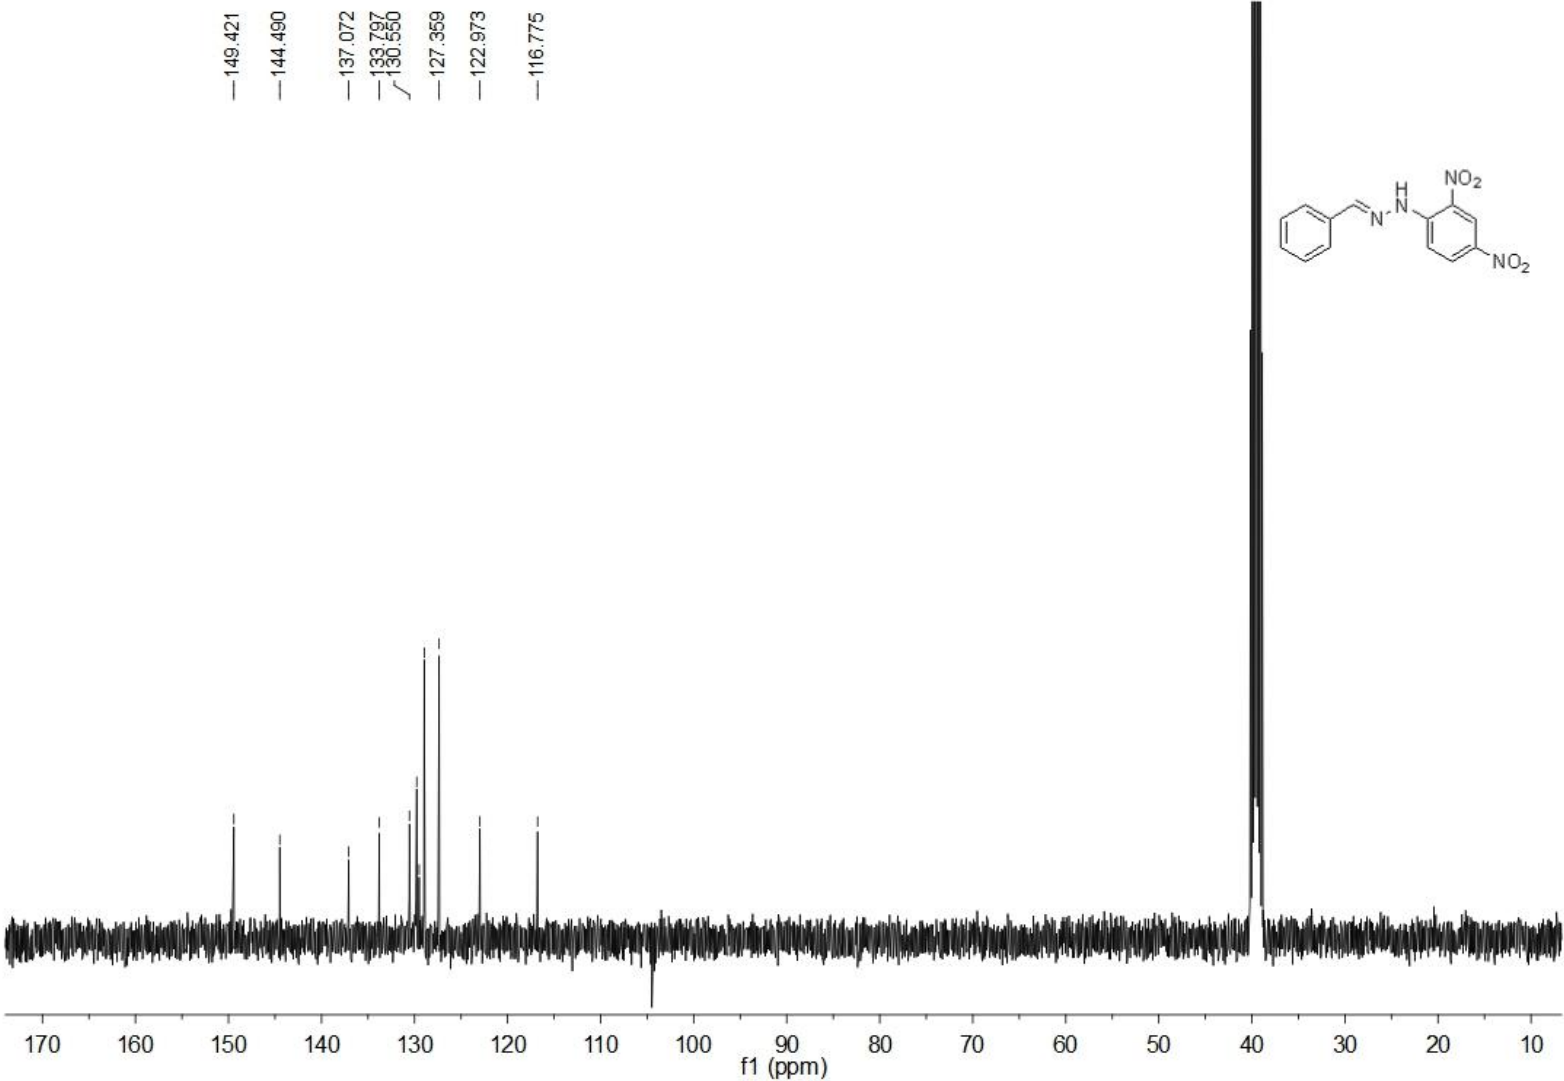

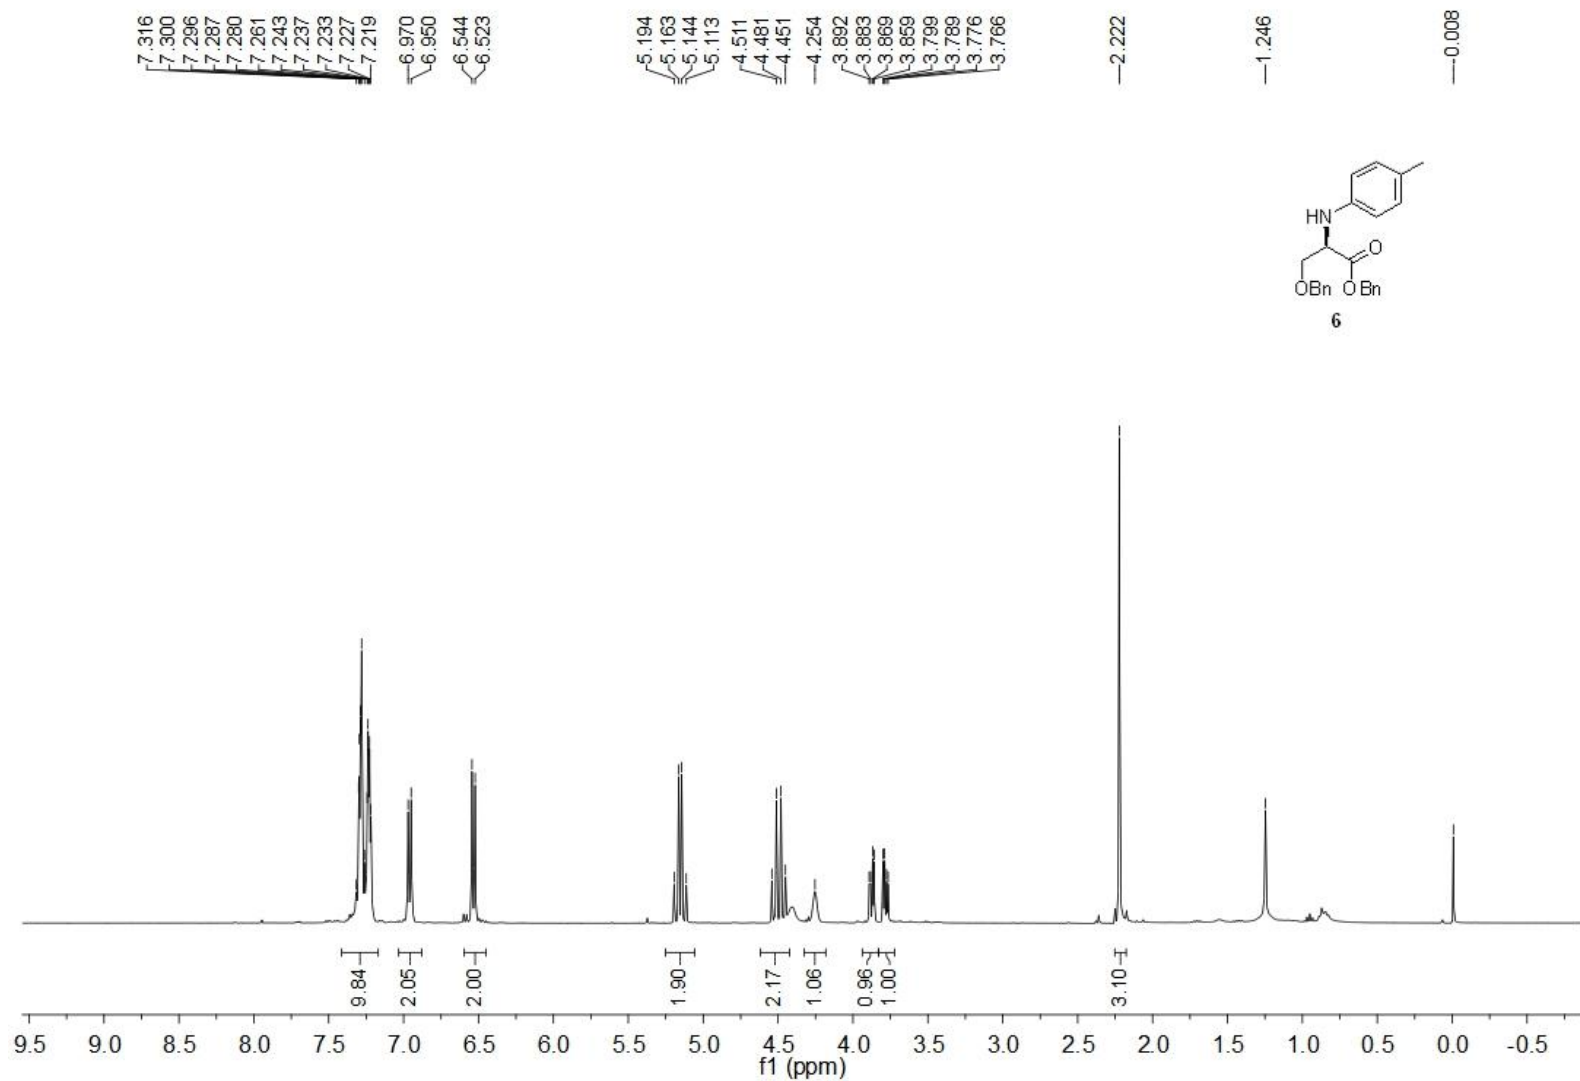



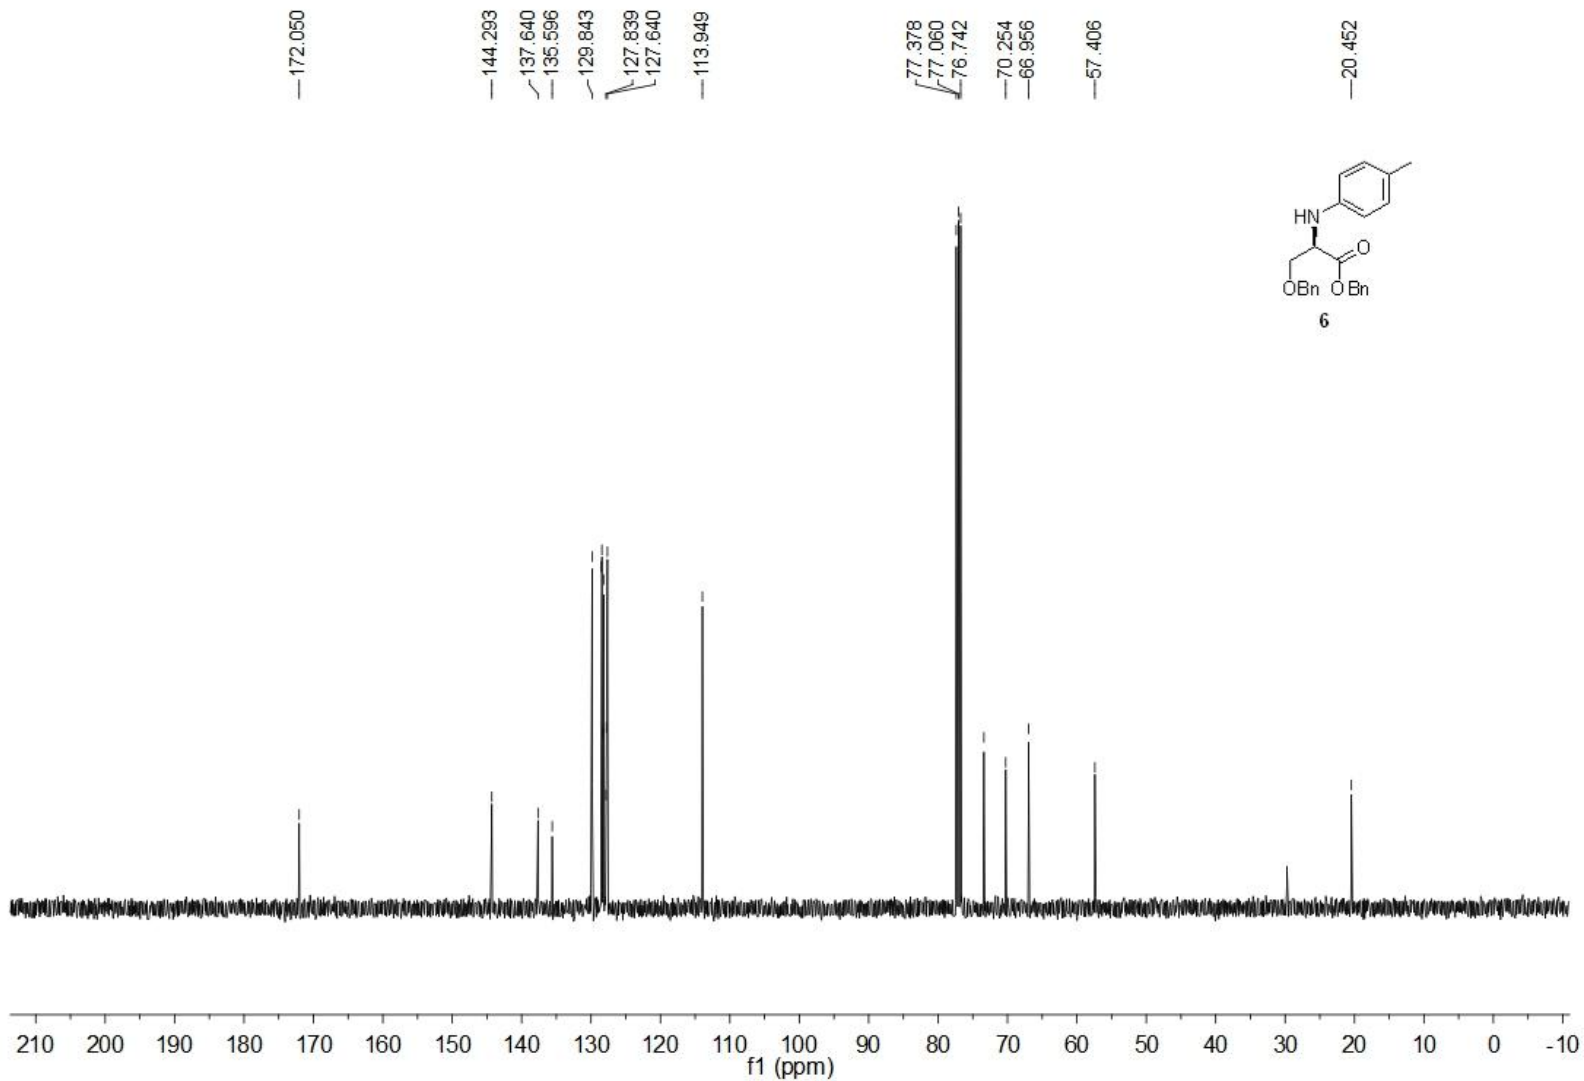

## 9. HPLC spectra for *ee* determination

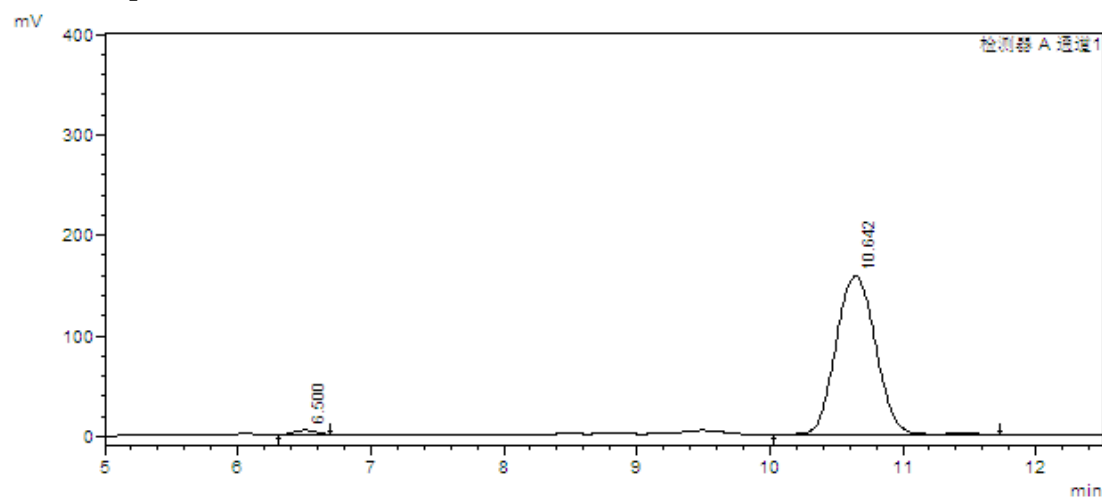

Detector A Ch1 254nm

| Peak# | Ret. Time | Area    | Height | Area%  | Height% |
|-------|-----------|---------|--------|--------|---------|
| 1     | 6.500     | 61685   | 4859   | 1.823  | 2.984   |
| 2     | 10.642    | 3322834 | 157977 | 98.177 | 97.016  |
| Total |           | 3384518 | 162835 | 100.00 | 100.00  |

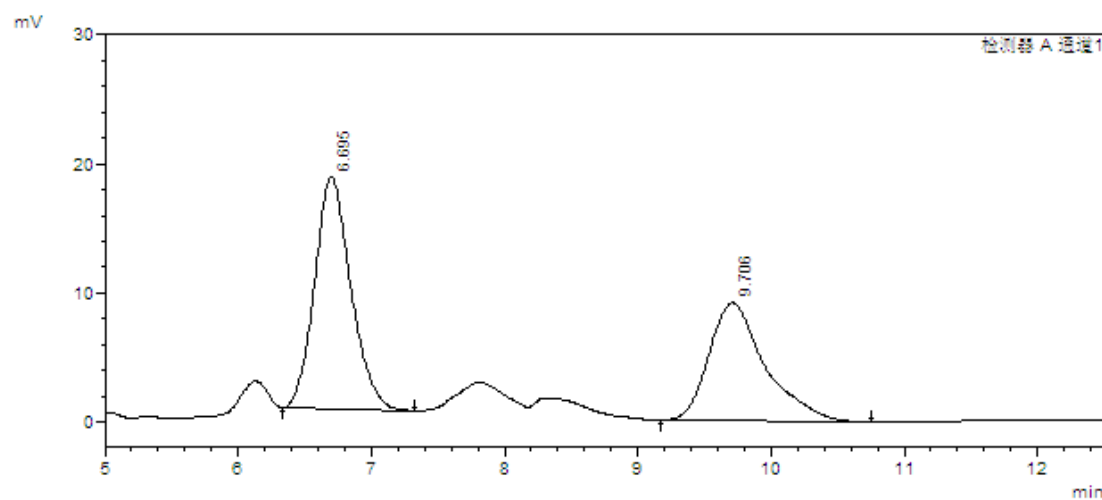

Detector A Ch1 254nm

| Peak# | Ret. Time | Area   | Height | Area%  | Height% |
|-------|-----------|--------|--------|--------|---------|
| 1     | 6.695     | 339139 | 17976  | 55.869 | 66.281  |
| 2     | 9.706     | 267887 | 9145   | 44.131 | 33.719  |
| Total |           | 607025 | 27122  | 100.00 | 100.00  |
